# Supplementary material for: Transition-metal-free alkylation strategy: facile access to alkylated oxindoles via alkyl transfer
Source: Royal Society of Chemistry journal article supplement (doi:10.1039/d2ob00019a), 2022-01-01

## Supporting Information

# Transition-Metal-Free Alkylation Strategy: A Facile Access of Alkylated Oxindoles via Alkyl Transfer

Wen-Qin Yu,<sup>†</sup> Jian-Hong Fan,<sup>†</sup> Pu Chen, Bi-Quan Xiong, Jun Xie,<sup>\*</sup> Ke-Wen Tang,  
Yu Liu,<sup>\*</sup>

<sup>a</sup> Department of Chemistry and Chemical Engineering, Hunan Institute of Science and  
Technology, Yueyang 414006, China

phone and fax number: +86073-0864-0122

<sup>†</sup> These authors contributed equally to this work.

E-mail addresses: lyxtmj\_613@163.com (Yu Liu) and xiejun12018014@163.com  
(Jun Xie)

### List of Contents

|                                                              |               |
|--------------------------------------------------------------|---------------|
| <b>1. General Information</b>                                | <b>S1</b>     |
| <b>2. Experimental Section</b>                               | <b>S1-S8</b>  |
| <b>2.1 General Procedure for the Synthesis of Substrates</b> | <b>S1</b>     |
| <b>2.2 Typical Experimental Procedure</b>                    | <b>S1-S2</b>  |
| <b>2.3 Radical trapping Experiments</b>                      | <b>S2-S8</b>  |
| <b>3. Reference</b>                                          | <b>S8</b>     |
| <b>4. <sup>1</sup>H and <sup>13</sup>C spectra</b>           | <b>S9-S64</b> |

## 1. General Information

Unless otherwise stated, all commercial reagents were used as received. Aniline (BK, 99%), aldehydes (Innochem, >98%) and halohydrocarbon (Innochem, >98%) were used without further treatment. All reagents and solvents were commercially available and used without any further purification unless specified. All solvents were dried and distilled according to standard procedures. Flash column chromatography was performed using silica gel (0.25mm, 300-400 mesh). Analytical thin-layer chromatography was performed using glass plates pre-coated with 0.25mm 300-400 mesh silica gel impregnated with a fluorescent indicator (254 nm). All reactions were carried out with magnetic stirring and in dried glassware. Nuclear magnetic resonance (NMR) spectra are recorded in parts per million from internal tetramethylsilane on the  $\delta$  scale.  $^1\text{H}$  NMR,  $^{19}\text{F}$  NMR and  $^{13}\text{C}$  NMR spectra were recorded in  $\text{CDCl}_3$  on a Bruker DRX-400 spectrometer operating at 400 MHz, 376 MHz and 100 MHz, respectively. All chemical shift values are quoted in ppm and coupling constants quoted in Hz. The solvent peak was used as a reference value, for  $^1\text{H}$  NMR: TMS = 0.00 ppm, for  $^{13}\text{C}$  NMR:  $\text{CDCl}_3$  = 77.00 ppm. The following abbreviations were used to explain multiplicities: s = singlet, d = doublet, dd = doublet of doublet, t = triplet, td = triplet of doublet, q = quartet, m = multiplet, and br = broad. High-resolution mass spectra (HRMS) were obtained on an Agilent mass spectrometer using ESI-TOF (electrospray ionization-time of flight).

## 2. Experiment Section

### 2.1 General Procedure for the Synthesis of Substrates

All *N*-arylacrylamide derivatives **1**<sup>1</sup> and 4-alkylated Hantzsch esters **2**<sup>2-3</sup> were synthesized according to the known methods.

### 2.2 Typical Experimental Procedure

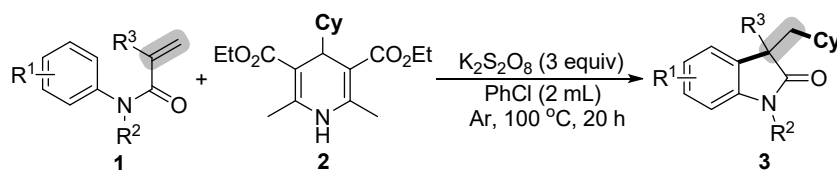

To a Schlenk tube were added *N*-arylacrylamide derivatives **1** (0.2 mmol, 0.1 M), acyl Hantzsch esters **2** (0.3 mmol, 1.5 equiv), K<sub>2</sub>S<sub>2</sub>O<sub>8</sub> (0.6 mmol, 3 equiv) and PhCl (2 mL) at 100 °C for 20 h. Until complete consumption of the starting material was observed by TLC and/or GC-MS analysis. After the reaction was finished, the reaction mixture removal of the solvent, the crude product was purified by column chromatography (petroleum ether/ethyl acetate, 10 : 1) to provide the desired products **3**. A scaled-up experiment conducted in the presence of **1a** (5 mmol), **2a** (7.5 mmol, 1.5 equiv), K<sub>2</sub>S<sub>2</sub>O<sub>8</sub> (15 mmol, 3 equiv) and PhCl (50 mL) at 100 °C for 120 h gave the target product **3aa** in 60% yield.

## 2.3 Radical Trapping Experiments

### 2.3.1 Using TEMPO as Radical Inhibitor

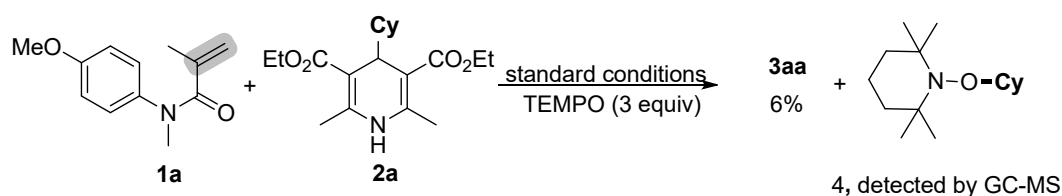

To a Schlenk tube were added *N*-arylacrylamide derivatives **1a** (0.2 mmol, 0.1 M), acyl Hantzsch esters **2a** (0.3 mmol, 1.5 equiv), K<sub>2</sub>S<sub>2</sub>O<sub>8</sub> (0.6 mmol, 3 equiv), TEMPO (3 equiv) and PhCl (2 mL) at 100 °C for 20 h. The GC-MS analysis of raw reaction mixture showed that onyl 6% yield of target product **3aa** was detected. Additionally, the cyclohexyl-trapping products **4** could be detected by GC-MS analysis of raw reaction mixture.

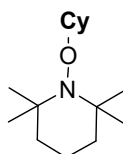

**4**, detected by GC-MS  
 Chemical Formula: C<sub>15</sub>H<sub>29</sub>NO  
 Exact Mass: 239.2249  
 Molecular Weight: 239.3969  
 m/z: 239.2249 (100.0%), 240.2283 (16.2%), 241.2316 (1.2%)  
 Elemental Analysis: C, 75.26; H, 12.21; N, 5.85; O, 6.68

# GC-MS analysis of raw reaction mixture by using TEMPO as radical inhibitor

## GC spectra

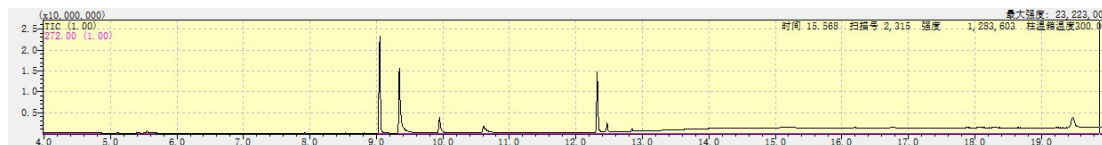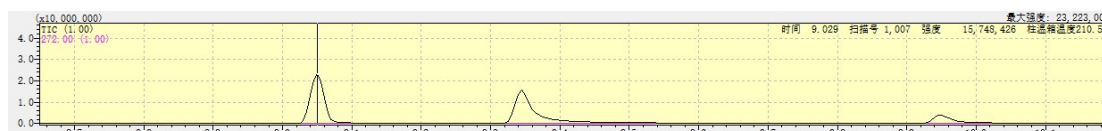

## MS spectra of the peak at 9.050 min

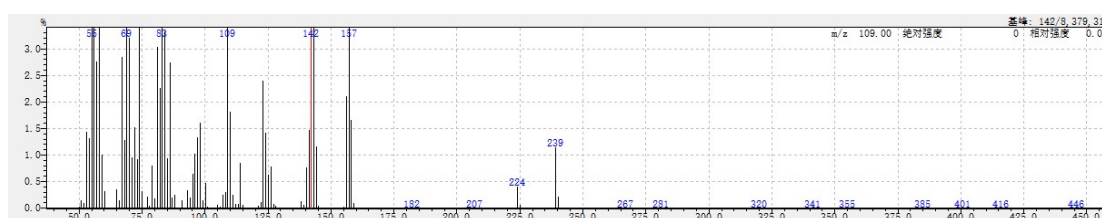

| [MS Spectrum] | 63.00                          | 16930.02 | 87.05  | 14056    | 0.18  |          |          |       |
|---------------|--------------------------------|----------|--------|----------|-------|----------|----------|-------|
| # of Peaks    | 281                            | 64.05    | 563    | 0.01     | 88.10 | 17200    | 0.22     |       |
| Raw Spectrum  | 9.055 (scan : 1012)            | 65.05    | 24727  | 0.32     | 89.10 | 961      | 0.01     |       |
| Background    | 8.770 (scan : 955)             | 66.05    | 10544  | 0.14     | 90.00 | 110      | 0.00     |       |
| Base Peak     | m/z 142.20 (Inten : 7,719,651) | 67.05    | 197888 | 2.56     | 91.05 | 10760    | 0.14     |       |
| Event#        | 1                              | 68.05    | 88777  | 1.15     | 92.10 | 17960.02 |          |       |
| m/z           | Absolute Intensity             | 69.05    | 923219 | 11.96    | 93.10 | 23651    | 0.31     |       |
|               | Relative Intensity             | 70.05    | 219894 | 2.85     | 94.10 | 14935    | 0.19     |       |
| 50.00         | 30390.04                       | 71.05    | 65901  | 0.85     | 95.10 | 45107    | 0.58     |       |
| 51.00         | 10249                          | 0.13     | 72.05  | 104784   | 1.36  | 96.10    | 69264    | 0.90  |
| 52.05         | 70170.09                       | 73.05    | 63164  | 0.82     | 97.10 | 91573    | 1.19     |       |
| 53.05         | 102045                         | 1.32     | 74.05  | 595765   | 7.72  | 98.10    | 107027   | 1.39  |
| 54.10         | 93252                          | 1.21     | 75.05  | 21670    | 0.28  | 99.15    | 10320    | 0.13  |
| 55.05         | 1674242                        | 21.69    | 76.05  | 15730.02 |       | 100.10   | 31626    | 0.41  |
| 56.05         | 667056                         | 8.64     | 77.05  | 17077    | 0.22  | 101.10   | 19890.03 |       |
| 57.10         | 191577                         | 2.48     | 78.05  | 39460.05 |       | 102.10   | 13620.02 |       |
| 58.05         | 435891                         | 5.65     | 79.05  | 54108    | 0.70  | 102.90   | 250      | 0.00  |
| 59.05         | 69675                          | 0.90     | 80.10  | 13075    | 0.17  | 104.10   | 287      | 0.00  |
| 60.05         | 22593                          | 0.29     | 81.05  | 206945   | 2.68  | 105.10   | 45460.06 |       |
| 61.05         | 827                            | 0.01     | 82.05  | 155225   | 2.01  | 106.10   | 19800.03 |       |
| 62.00         | 829                            | 0.01     | 83.10  | 426320   | 5.52  | 107.10   | 17391    | 0.23  |
|               |                                |          | 84.10  | 225669   | 2.92  | 108.15   | 20011    | 0.26  |
|               |                                |          | 85.10  | 63152    | 0.82  | 109.10   | 962268   | 12.47 |
|               |                                |          | 86.05  | 186362   | 2.41  | 110.10   | 122978   | 1.59  |

|        |          |        |        |          |        |               |                 |             |
|--------|----------|--------|--------|----------|--------|---------------|-----------------|-------------|
| 111.10 | 15860    | 0.21   | 159.10 | 65490.08 | 220.95 | 633           | 0.01            |             |
| 112.15 | 57100.07 |        | 160.10 | 274      | 0.00   | 222.20        | 253             | 0.00        |
| 113.15 | 59260.08 |        | 161.10 | 86       | 0.00   | 223.25        | 271             | 0.00        |
| 114.10 | 55840    | 0.72   | 162.10 | 37       | 0.00   | 224.20        | 25471           | 0.33        |
| 115.10 | 41070.05 |        | 163.10 | 13       | 0.00   | 225.15        | 35010.05        |             |
| 116.15 | 10730.01 |        | 166.10 | 197      | 0.00   | 226.30        | 306             | 0.00        |
| 117.10 | 187      | 0.00   | 168.10 | 142      | 0.00   | 227.30        | 38              | 0.00        |
| 118.20 | 95       | 0.00   | 169.10 | 20       | 0.00   | 228.30        | 9               | 0.00        |
| 119.20 | 287      | 0.00   | 170.10 | 5        | 0.00   | 230.30        | 16              | 0.00        |
| 120.25 | 367      | 0.00   | 172.10 | 96       | 0.00   | 231.30        | 52              | 0.00        |
| 121.15 | 33200.04 |        | 174.10 | 59       | 0.00   | 232.30        | 5               | 0.00        |
| 122.25 | 79140.10 |        | 175.10 | 32       | 0.00   | 233.30        | 20              | 0.00        |
| 123.15 | 157884   | 2.05   | 176.10 | 133      | 0.00   | 236.30        | 31              | 0.00        |
| 124.20 | 91828    | 1.19   | 178.10 | 222      | 0.00   | 237.30        | 31              | 0.00        |
| 125.20 | 41526    | 0.54   | 179.10 | 7        | 0.00   | <b>238.20</b> | <b>131</b>      | <b>0.00</b> |
| 126.15 | 51966    | 0.67   | 180.10 | 126      | 0.00   | <b>239.20</b> | <b>65216</b>    | <b>0.84</b> |
| 127.20 | 53480.07 |        | 181.10 | 80       | 0.00   | <b>240.20</b> | <b>11931</b>    | <b>0.15</b> |
| 128.20 | 36370.05 |        | 182.10 | 165      | 0.00   | <b>241.20</b> | <b>11040.01</b> |             |
| 129.20 | 90       | 0.00   | 184.10 | 128      | 0.00   | <b>242.20</b> | <b>71</b>       | <b>0.00</b> |
| 131.00 | 123      | 0.00   | 185.10 | 45       | 0.00   | 243.20        | 6               | 0.00        |
| 132.00 | 48       | 0.00   | 190.95 | 21       | 0.00   | 247.20        | 21              | 0.00        |
| 133.15 | 31       | 0.00   | 191.90 | 10       | 0.00   | 249.20        | 91              | 0.00        |
| 135.15 | 355      | 0.00   | 193.05 | 289      | 0.00   | 250.20        | 18              | 0.00        |
| 136.15 | 17100.02 |        | 194.00 | 88       | 0.00   | 251.20        | 83              | 0.00        |
| 137.10 | 833      | 0.01   | 196.00 | 126      | 0.00   |               |                 |             |
| 138.15 | 93450.12 |        | 197.00 | 33       | 0.00   |               |                 |             |
| 139.15 | 40360.05 |        | 198.00 | 30       | 0.00   |               |                 |             |
| 140.15 | 48897    | 0.63   | 199.00 | 7        | 0.00   |               |                 |             |
| 141.25 | 93398    | 1.21   | 200.00 | 2        | 0.00   |               |                 |             |
| 142.20 | 7719651  | 100.00 | 203.00 | 30       | 0.00   |               |                 |             |
| 143.15 | 1202386  | 15.58  | 205.00 | 24       | 0.00   |               |                 |             |
| 144.15 | 71088    | 0.92   | 206.00 | 61       | 0.00   |               |                 |             |
| 145.15 | 31610.04 |        | 207.00 | 883      | 0.01   |               |                 |             |
| 146.10 | 187      | 0.00   | 208.00 | 283      | 0.00   |               |                 |             |
| 147.05 | 555      | 0.01   | 209.00 | 85       | 0.00   |               |                 |             |
| 149.15 | 143      | 0.00   | 210.00 | 57       | 0.00   |               |                 |             |
| 150.10 | 56       | 0.00   | 212.00 | 31       | 0.00   |               |                 |             |
| 151.05 | 242      | 0.00   | 213.00 | 8        | 0.00   |               |                 |             |
| 153.10 | 48       | 0.00   | 215.00 | 23       | 0.00   |               |                 |             |
| 154.20 | 906      | 0.01   | 216.00 | 40       | 0.00   |               |                 |             |
| 155.15 | 13680.02 |        | 217.00 | 10       | 0.00   |               |                 |             |
| 156.15 | 132436   | 1.72   | 218.00 | 18       | 0.00   |               |                 |             |
| 157.15 | 1000692  | 12.96  | 219.00 | 27       | 0.00   |               |                 |             |
| 158.10 | 101371   | 1.31   | 220.00 | 8        | 0.00   |               |                 |             |

### 2.3.2 Using BHT as Radical Inhibitor

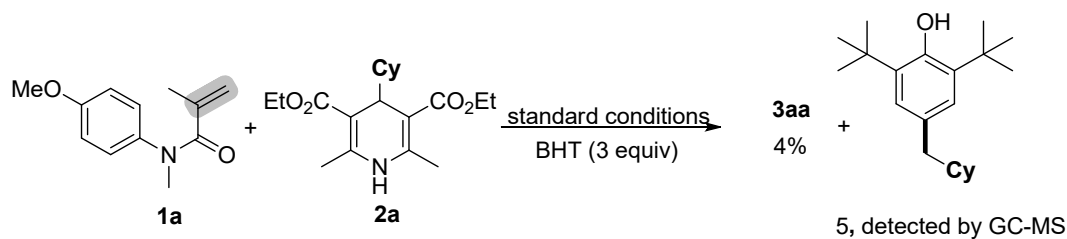

To a Schlenk tube were added N-arylacrylamide derivatives **1a** (0.2 mmol, 0.1 M), acyl Hantzsch esters **2a** (0.3 mmol, 1.5 equiv),  $\text{K}_2\text{S}_2\text{O}_8$  (0.6 mmol, 3 equiv), BHT (3 equiv) and PhCl (2 mL) at 100 °C for 20 h. The GC-MS analysis of raw reaction mixture showed that onyl 4% yield of target product **3aa** was detected. Additionally, the cyclohexyl-trapping products **5** could be detected by GC-MS analysis of raw reaction mixture.

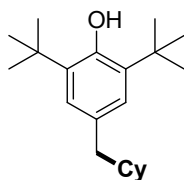

**5**, detected by GC-MS  
 Chemical Formula:  $\text{C}_{21}\text{H}_{34}\text{O}$   
 Exact Mass: 302.2610  
 Molecular Weight: 302.4941  
 m/z: 302.2610 (100.0%), 303.2643 (22.7%), 304.2677 (2.5%)  
 Elemental Analysis: C, 83.38; H, 11.33; O, 5.29

GC-MS analysis of raw reaction mixture by using BHT as radical inhibitor

GC spectra

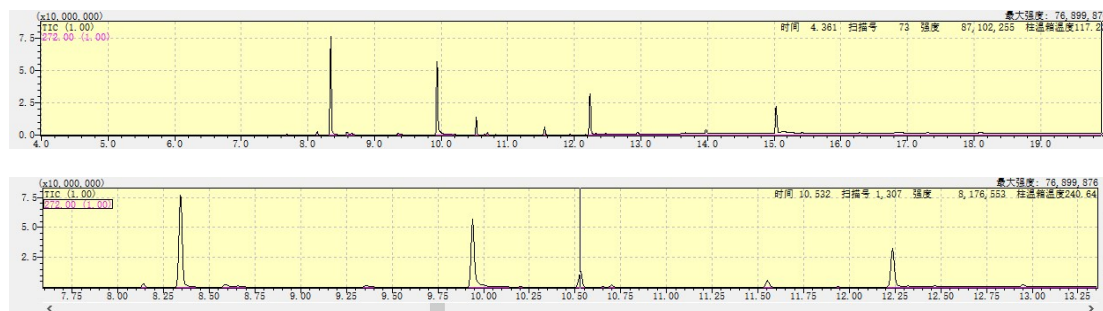

MS spectra of the peak at 10.532 min

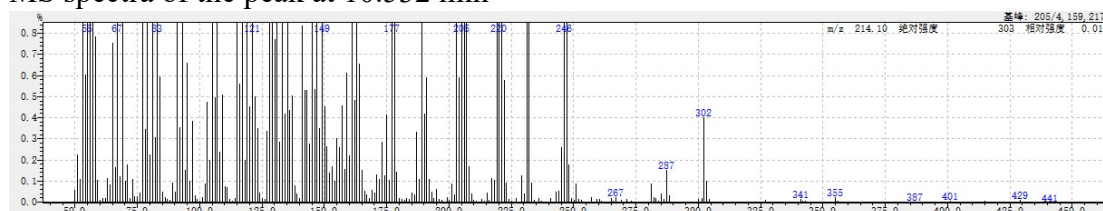

| [MS Spectrum]                            |                    |           | 82.15  | 13216    | 0.31 | 125.10 | 686      | 0.02 |
|------------------------------------------|--------------------|-----------|--------|----------|------|--------|----------|------|
| # of Peaks                               |                    |           | 83.10  | 405811   | 9.55 | 126.15 | 296      | 0.01 |
| Raw Spectrum 10.530 (scan : 1307)        |                    |           | 84.10  | 27416    | 0.65 | 127.10 | 15274    | 0.36 |
| Background 10.480 (scan : 1297)          |                    |           | 85.10  | 18040.04 |      | 128.10 | 58398    | 1.37 |
| Base Peak m/z 205.15 (Inten : 4,249,046) |                    |           | 86.15  | 11800.03 |      | 129.10 | 64541    | 1.52 |
| Event# 1                                 |                    |           | 87.10  | 515      | 0.01 | 130.10 | 35834    | 0.84 |
| m/z                                      | Absolute           | Intensity | 87.85  | 409      | 0.01 | 131.10 | 68274    | 1.61 |
|                                          | Relative Intensity |           | 89.00  | 41140.10 |      | 132.15 | 12219    | 0.29 |
| 50.00                                    | 26110.06           |           | 90.15  | 22660.05 |      | 133.15 | 85415    | 2.01 |
| 51.00                                    | 10208              | 0.24      | 91.10  | 144842   | 3.41 | 134.10 | 18656    | 0.44 |
| 52.05                                    | 45390.11           |           | 92.10  | 15638    | 0.37 | 135.15 | 72780    | 1.71 |
| 53.05                                    | 56928              | 1.34      | 93.10  | 41842    | 0.98 | 136.15 | 18422    | 0.43 |
| 54.15                                    | 28787              | 0.68      | 94.10  | 67120.16 |      | 137.15 | 20304    | 0.48 |
| 55.05                                    | 961645             | 22.63     | 95.10  | 30630    | 0.72 | 138.15 | 27180.06 |      |
| 56.10                                    | 50300              | 1.18      | 96.05  | 28900.07 |      | 139.10 | 17430.04 |      |
| 57.10                                    | 803558             | 18.91     | 97.10  | 17255    | 0.41 | 140.15 | 709      | 0.02 |
| 58.05                                    | 37771              | 0.89      | 98.10  | 14960.04 |      | 141.10 | 37078    | 0.87 |
| 59.05                                    | 47350.11           |           | 99.10  | 479      | 0.01 | 142.10 | 23718    | 0.56 |
| 60.05                                    | 250                | 0.01      | 100.05 | 330      | 0.01 | 143.10 | 23479    | 0.55 |
| 61.00                                    | 350                | 0.01      | 101.05 | 13090.03 |      | 144.15 | 12399    | 0.29 |
| 62.05                                    | 472                | 0.01      | 102.10 | 39910.09 |      | 145.10 | 133355   | 3.14 |
| 63.05                                    | 42750.10           |           | 103.05 | 21853    | 0.51 | 146.10 | 23841    | 0.56 |
| 64.05                                    | 24690.06           |           | 104.15 | 85610.20 |      | 147.10 | 50338    | 1.18 |
| 65.05                                    | 35617              | 0.84      | 105.10 | 168264   | 3.96 | 148.10 | 15009    | 0.35 |
| 66.00                                    | 75040.18           |           | 106.10 | 21355    | 0.50 | 149.10 | 147168   | 3.46 |
| 67.05                                    | 79379              | 1.87      | 107.10 | 46461    | 1.09 | 150.10 | 17384    | 0.41 |
| 68.05                                    | 57700.14           |           | 108.10 | 10832    | 0.25 | 151.10 | 87590.21 |      |
| 69.05                                    | 63588              | 1.50      | 109.10 | 23965    | 0.56 | 152.10 | 58260.14 |      |
| 70.05                                    | 48500.11           |           | 110.15 | 30360.07 |      | 153.10 | 76380.18 |      |
| 71.05                                    | 84330.20           |           | 111.10 | 31790.07 |      | 154.05 | 41280.10 |      |
| 72.05                                    | 11130.03           |           | 112.10 | 176      | 0.00 | 155.10 | 13941    | 0.33 |
| 73.05                                    | 10300.02           |           | 113.10 | 225      | 0.01 | 156.10 | 12195    | 0.29 |
| 74.00                                    | 990                | 0.02      | 114.15 | 685      | 0.02 | 157.10 | 20576    | 0.48 |
| 75.00                                    | 787                | 0.02      | 115.10 | 59987    | 1.41 | 158.10 | 67260.16 |      |
| 76.05                                    | 20510.05           |           | 116.10 | 25613    | 0.60 | 159.10 | 27946    | 0.66 |
| 77.05                                    | 65659              | 1.55      | 117.10 | 44618    | 1.05 | 160.15 | 86160.20 |      |
| 78.05                                    | 14468              | 0.34      | 118.15 | 76350.18 |      | 161.10 | 127248   | 2.99 |
| 79.05                                    | 72006              | 1.69      | 119.10 | 121282   | 2.85 | 162.10 | 21200    | 0.50 |
| 80.10                                    | 10506              | 0.25      | 120.15 | 18636    | 0.44 | 163.10 | 74733    | 1.76 |
| 81.05                                    | 57008              | 1.34      | 121.10 | 179741   | 4.23 | 164.10 | 28590    | 0.67 |
|                                          |                    |           | 122.15 | 21596    | 0.51 | 165.10 | 65150.15 |      |
|                                          |                    |           | 123.15 | 15897    | 0.37 | 166.00 | 20760.05 |      |
|                                          |                    |           | 124.15 | 21100.05 |      | 167.15 | 14860.03 |      |

|        |          |        |        |          |       |  |        |          |      |
|--------|----------|--------|--------|----------|-------|--|--------|----------|------|
| 168.10 | 10600.02 |        | 211.10 | 226      | 0.01  |  | 259.20 | 926      | 0.02 |
| 169.10 | 25540.06 |        | 212.10 | 93       | 0.00  |  | 260.25 | 638      | 0.02 |
| 170.05 | 22530.05 |        | 213.10 | 819      | 0.02  |  | 261.15 | 728      | 0.02 |
| 171.10 | 59930.14 |        | 214.15 | 218      | 0.01  |  | 263.20 | 58       | 0.00 |
| 172.05 | 50600.12 |        | 215.15 | 18120.04 |       |  | 264.10 | 38       | 0.00 |
| 173.10 | 12520    | 0.29   | 216.15 | 563      | 0.01  |  | 265.10 | 224      | 0.01 |
| 174.10 | 54720.13 |        | 217.10 | 44640.11 |       |  | 266.05 | 85       | 0.00 |
| 175.10 | 18162    | 0.43   | 218.15 | 44220.10 |       |  | 268.00 | 57       | 0.00 |
| 176.15 | 45430.11 |        | 219.25 | 44452    | 1.05  |  | 269.05 | 217      | 0.01 |
| 177.10 | 285431   | 6.72   | 220.15 | 1496618  | 35.22 |  | 271.20 | 562      | 0.01 |
| 178.10 | 40986    | 0.96   | 221.15 | 245460   | 5.78  |  | 272.20 | 204      | 0.00 |
| 179.05 | 46630.11 |        | 222.10 | 22006    | 0.52  |  | 273.20 | 211      | 0.00 |
| 180.10 | 473      | 0.01   | 223.05 | 16550.04 |       |  | 274.20 | 109      | 0.00 |
| 181.10 | 552      | 0.01   | 224.00 | 229      | 0.01  |  | 276.20 | 10       | 0.00 |
| 182.05 | 548      | 0.01   | 225.05 | 778      | 0.02  |  | 277.20 | 8        | 0.00 |
| 183.05 | 742      | 0.02   | 226.10 | 208      | 0.00  |  | 278.20 | 11       | 0.00 |
| 184.15 | 575      | 0.01   | 227.10 | 10080.02 |       |  | 282.05 | 352      | 0.01 |
| 185.10 | 19250.05 |        | 228.05 | 266      | 0.01  |  | 284.00 | 189      | 0.00 |
| 186.10 | 18640.04 |        | 229.10 | 55330.13 |       |  | 285.20 | 14290.03 |      |
| 187.10 | 14432    | 0.34   | 230.25 | 17210.04 |       |  | 286.20 | 612      | 0.01 |
| 188.15 | 47300.11 |        | 231.15 | 213884   | 5.03  |  | 287.25 | 64480.15 |      |
| 189.10 | 108435   | 2.55   | 232.15 | 36325    | 0.85  |  | 288.30 | 12370.03 |      |
| 190.10 | 18040    | 0.42   | 233.15 | 40230.09 |       |  | 289.30 | 130      | 0.00 |
| 191.10 | 24089    | 0.57   | 234.15 | 386      | 0.01  |  | 290.30 | 41       | 0.00 |
| 192.05 | 42790.10 |        | 235.10 | 40       | 0.00  |  | 294.30 | 29       | 0.00 |
| 193.00 | 511      | 0.01   | 239.10 | 197      | 0.00  |  | 296.30 | 53       | 0.00 |
| 193.95 | 183      | 0.00   | 240.05 | 195      | 0.00  |  | 297.30 | 64       | 0.00 |
| 195.00 | 262      | 0.01   | 241.05 | 452      | 0.01  |  | 298.30 | 39       | 0.00 |
| 196.10 | 341      | 0.01   | 242.20 | 135      | 0.00  |  | 299.30 | 20       | 0.00 |
| 197.00 | 664      | 0.02   | 243.15 | 14220.03 |       |  | 300.20 | 540      | 0.01 |
| 198.20 | 243      | 0.01   | 244.20 | 21270.05 |       |  | 301.25 | 752      | 0.02 |
| 199.15 | 955      | 0.02   | 245.25 | 10870    | 0.26  |  | 302.25 | 15161    | 0.36 |
| 200.10 | 322      | 0.01   | 246.20 | 361054   | 8.50  |  | 303.30 | 36850.09 |      |
| 201.10 | 37100.09 |        | 247.20 | 67167    | 1.58  |  | 304.30 | 662      | 0.02 |
| 202.15 | 15330.04 |        | 248.10 | 66810.16 |       |  | 305.30 | 26       | 0.00 |
| 203.10 | 42457    | 1.00   | 249.20 | 563      | 0.01  |  | 306.30 | 4        | 0.00 |
| 204.15 | 24654    | 0.58   | 251.05 | 139      | 0.00  |  | 310.30 | 100      | 0.00 |
| 205.15 | 4249046  | 100.00 | 252.10 | 57       | 0.00  |  | 315.30 | 6        | 0.00 |
| 206.10 | 672979   | 15.84  | 255.00 | 55       | 0.00  |  | 316.30 | 12       | 0.00 |
| 207.10 | 57283    | 1.35   | 256.00 | 22       | 0.00  |  | 318.30 | 17       | 0.00 |
| 208.05 | 37110.09 |        | 257.20 | 11080.03 |       |  | 319.30 | 7        | 0.00 |
| 209.90 | 262      | 0.01   | 258.20 | 188      | 0.00  |  |        |          |      |



### 2.3.3 Using 1,1-diphenylethene as Radical Inhibitor

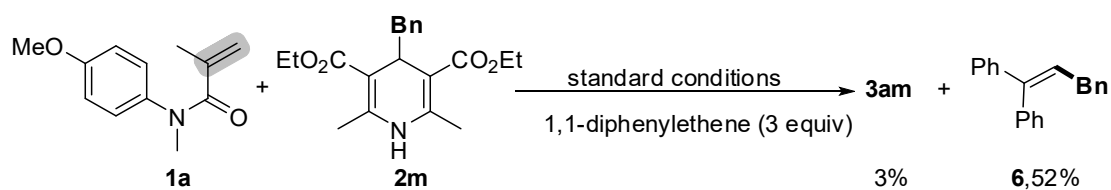

To a Schlenk tube were added N-arylacrylamide derivatives **1a** (0.2 mmol, 0.1 M), acyl Hantzsch esters **2m** (0.3 mmol, 1.5 equiv),  $K_2S_2O_8$  (0.6 mmol, 3 equiv), 1,1-diphenylethene (3 equiv) and PhCl (2 mL) at 100 °C for 20 h. The GC-MS analysis of raw reaction mixture showed that onyl 3% yield of target product **3am** was detected. The benzyl-trapping products **6** could be obtained in 52% yield.

### 3. References

- [1] Q.-L. Wang, Q. Zhou, J. Liao, Z. Chen, B.-Q. Xiong, G.-J. Deng, K.-W. Tang and Y. Liu, *J. Org., Chem.*, 2021, **86**, 2866-2875.
- [2] F. Gu, W. Huang, X. Liu, W. Chen and X. Cheng, *Adv. Synth. Catal.*, 2018, **360**, 925.
- [3] Q.-Y. Wu, Q.-Q. Min, G.-Z. Ao and F. Liu, *Org. Biomol. Chem.*, 2018, **16**, 6391.

## 4. Spectra

### 3-(Cyclohexylmethyl)-5-methoxy-1,3-dimethylindolin-2-one (3aa)

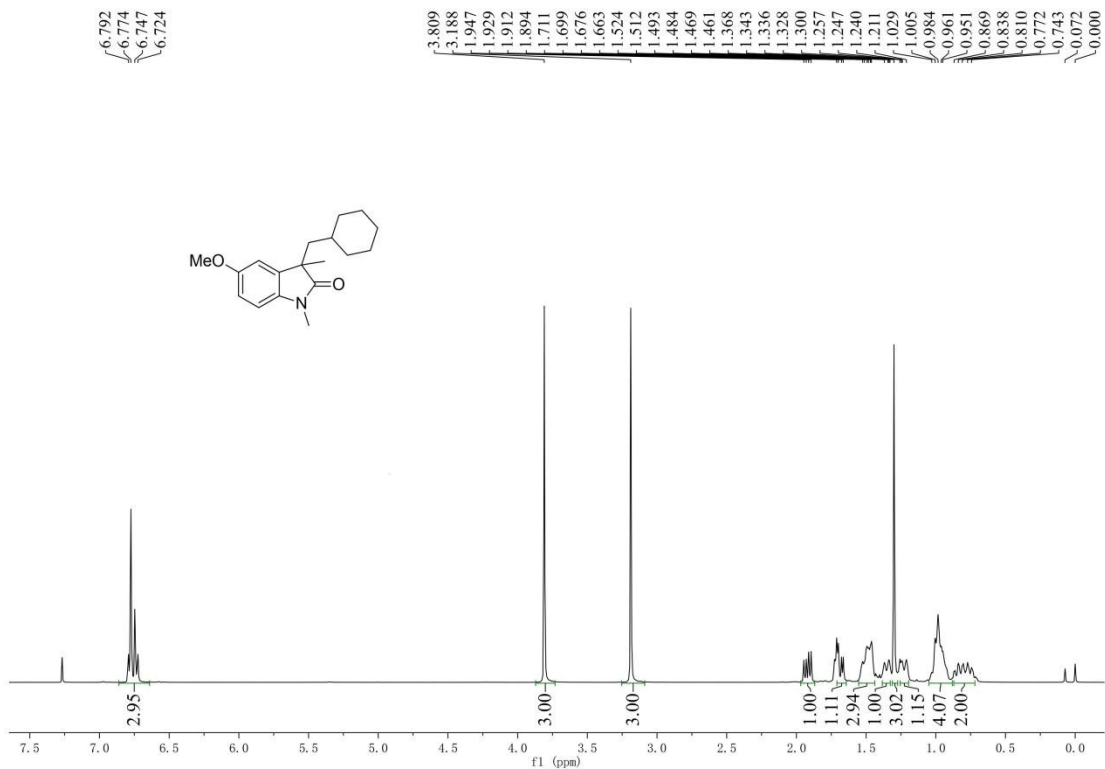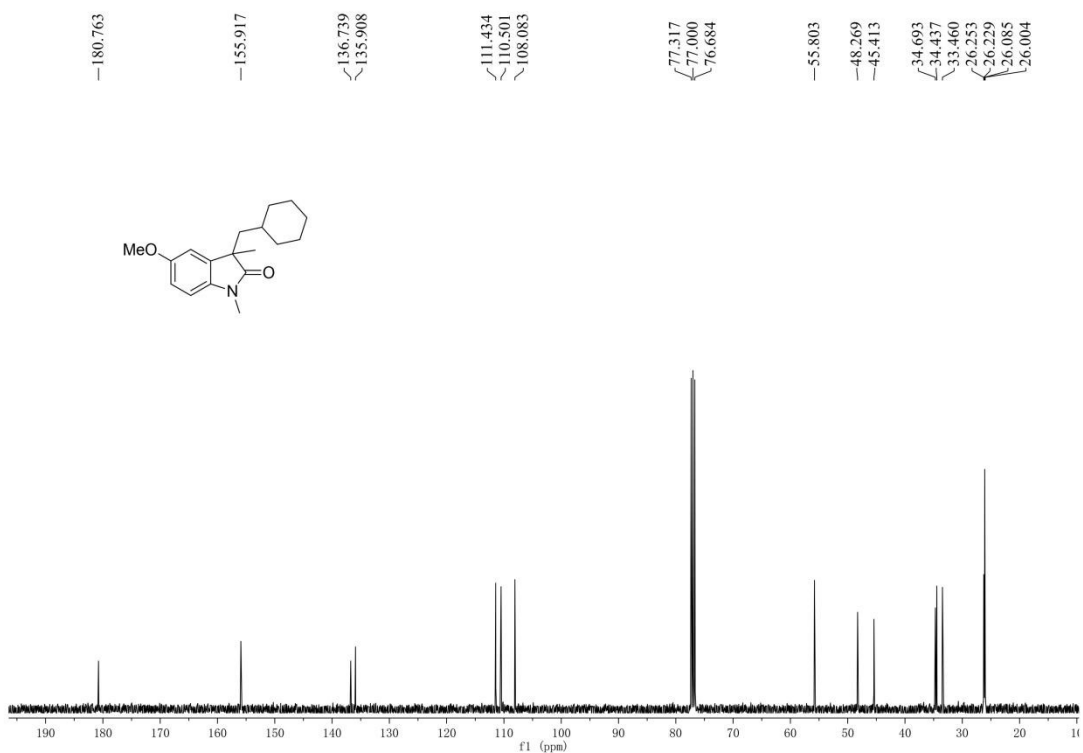

### 3-(Cyclohexylmethyl)-1,3-dimethyl-5-phenoxyindolin-2-one (3ba)

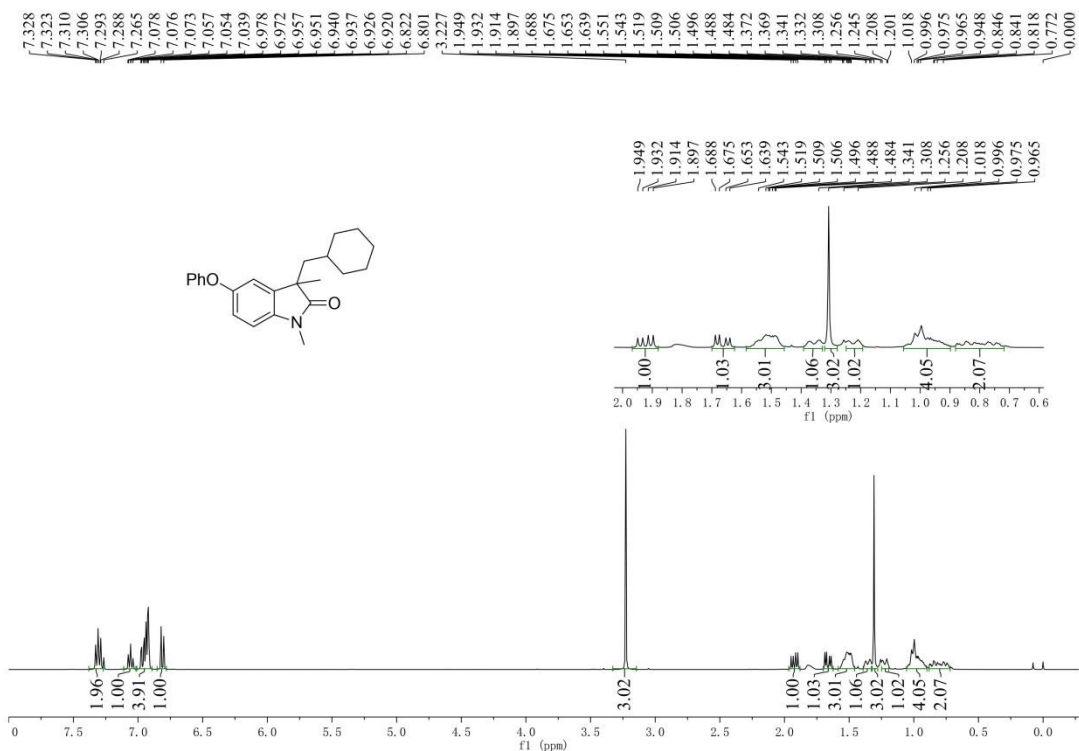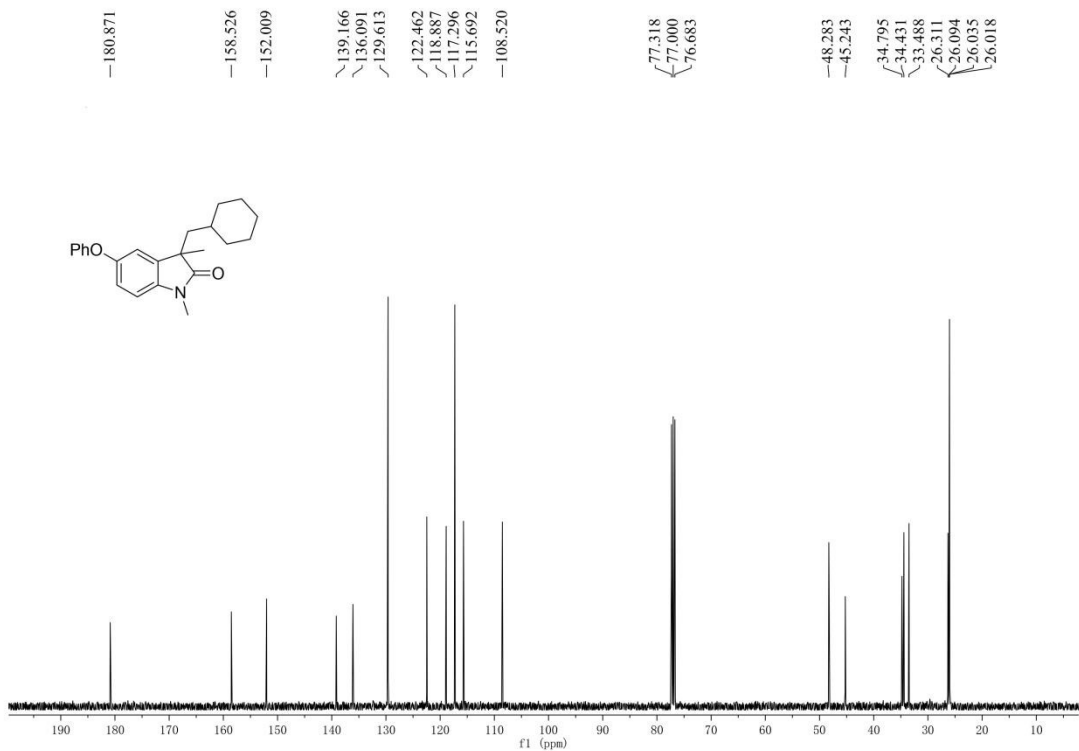

### 3-(Cyclohexylmethyl)-1,3,5-trimethylindolin-2-one (3ca)

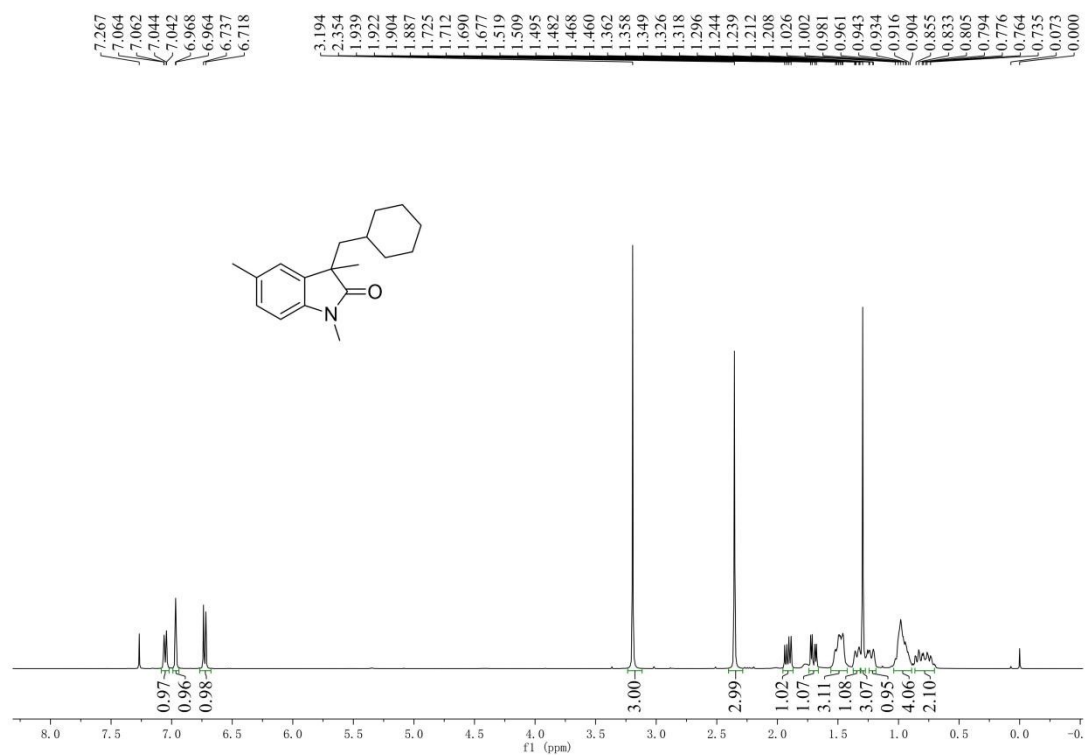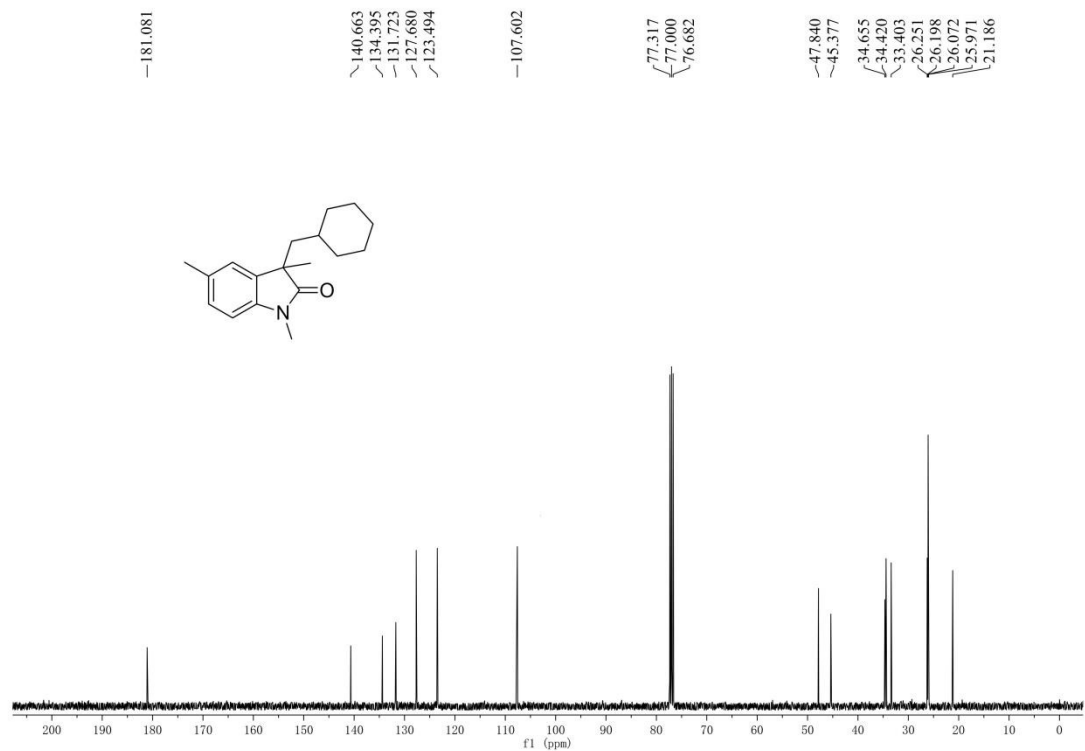

**5-(*Tert*-butyl)-3-(cyclohexylmethyl)-1,3-dimethylindolin-2-one (3da)**

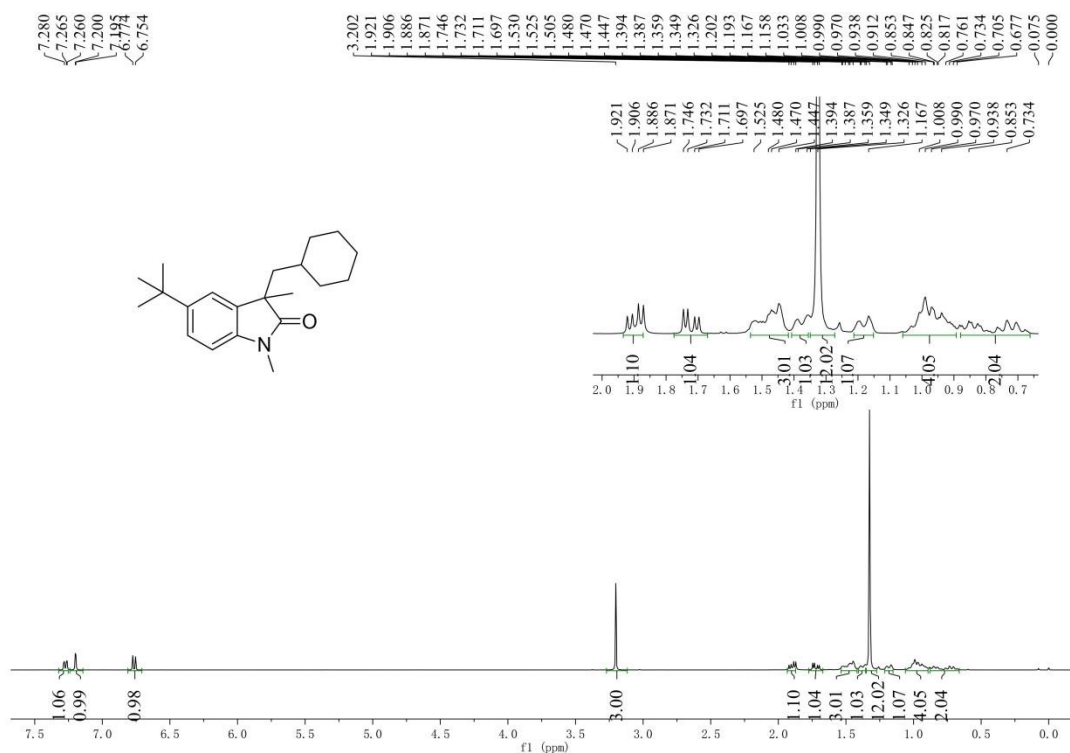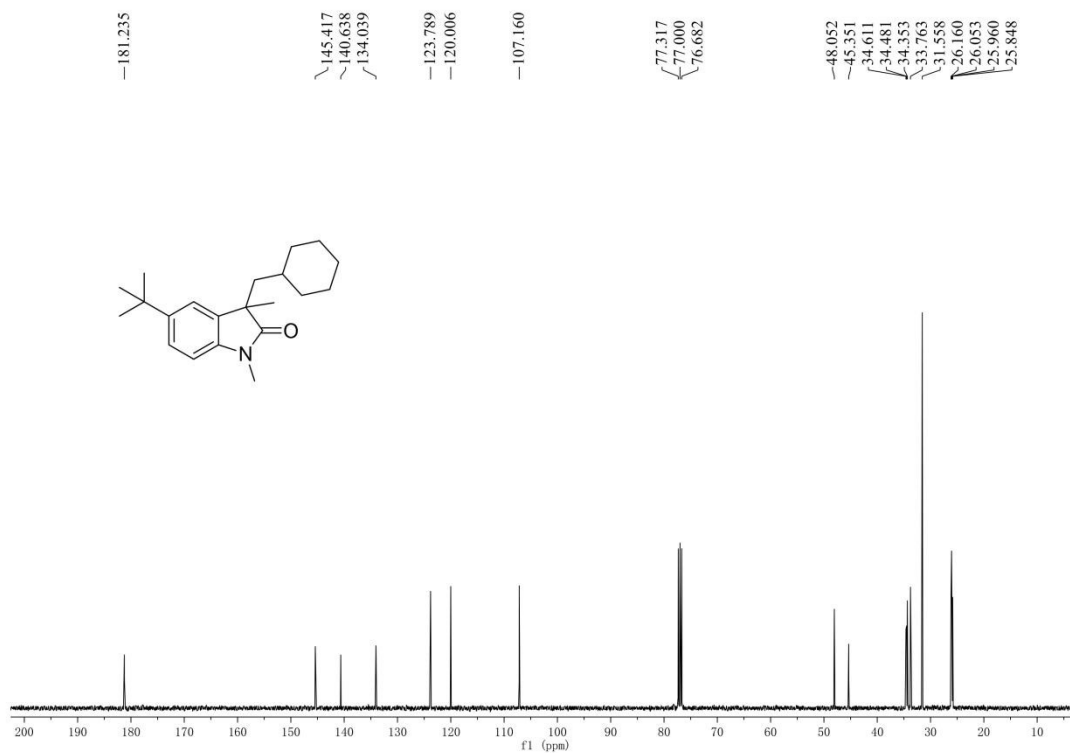

### 3-(Cyclohexylmethyl)-1,3-dimethylindolin-2-one (3ea)

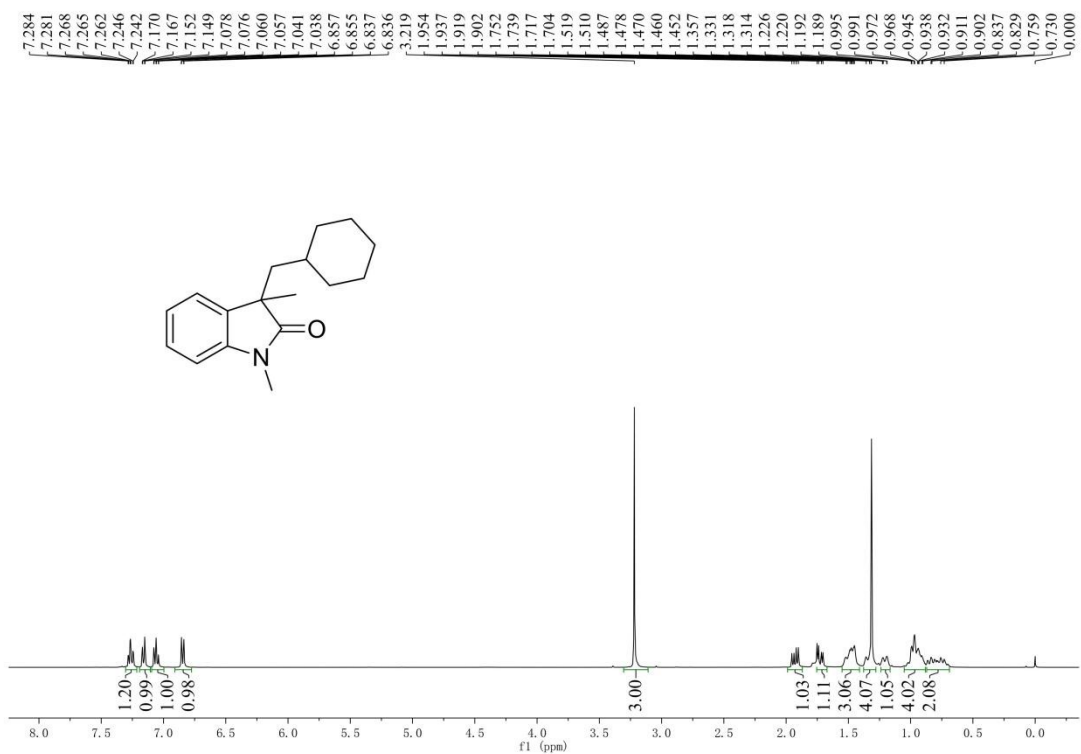

Chemical shifts (ppm): 181.125, 143.032, 134.349, 127.470, 122.666, 122.289, 107.912, 77.317, 76.999, 76.682, 47.822, 45.367, 34.689, 34.414, 33.472, 26.173, 26.131, 26.062, 26.048, 25.984.

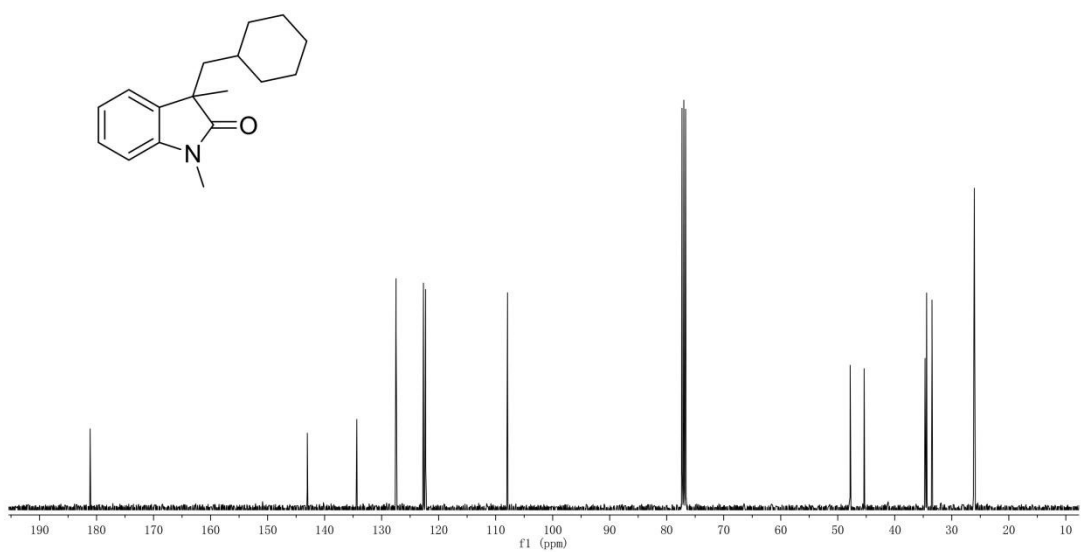

### 3-(Cyclohexylmethyl)-5-fluoro-1,3-dimethylindolin-2-one (3fa)

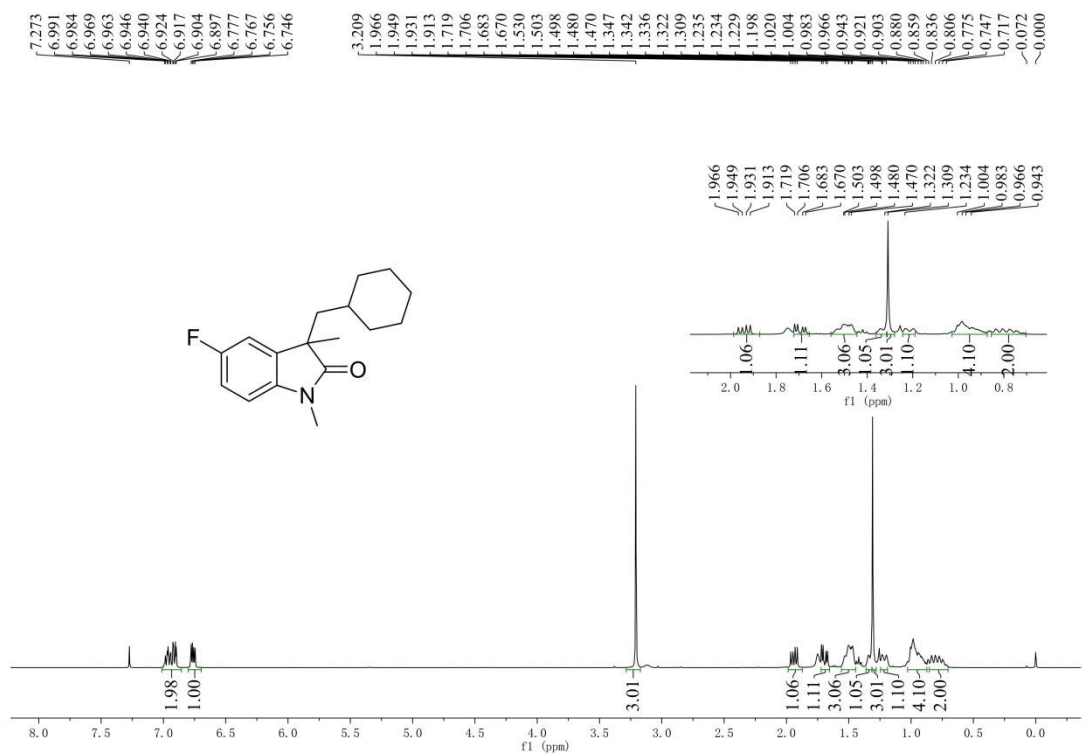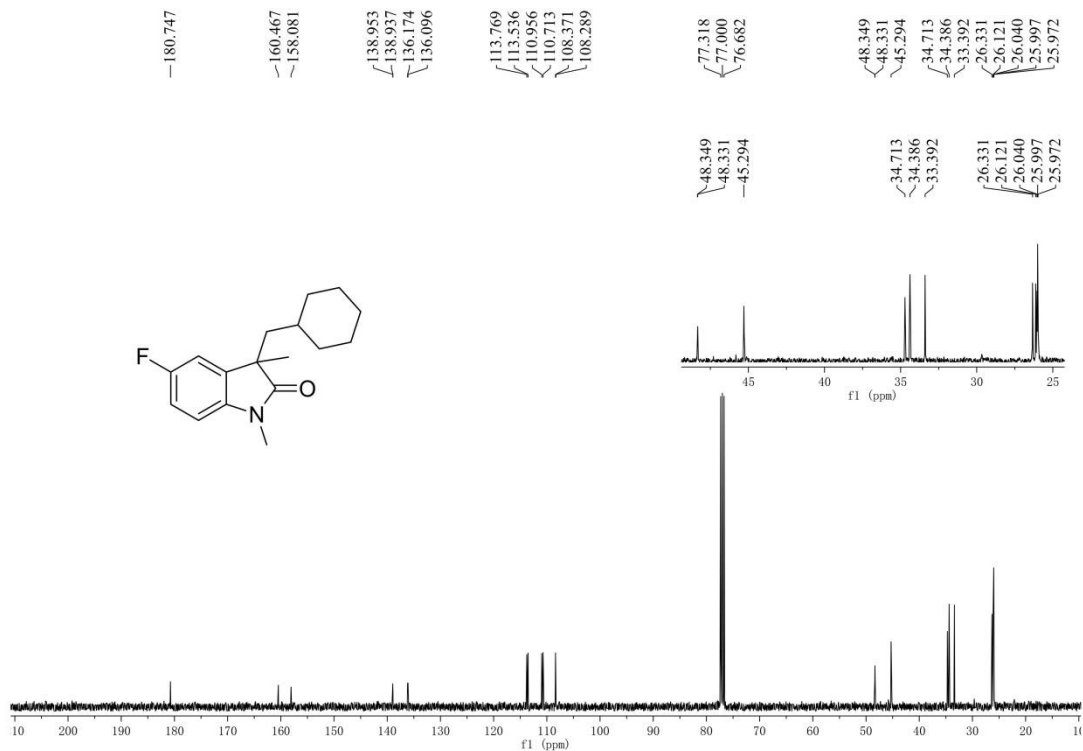

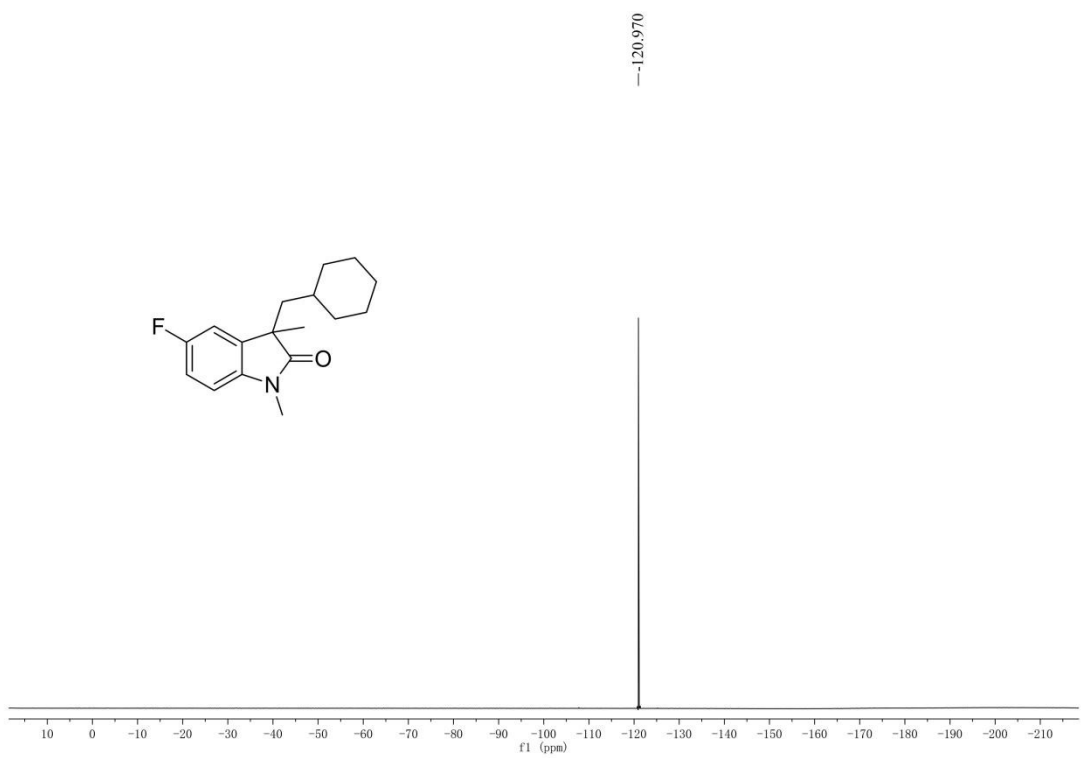



### 5-Chloro-3-(cyclohexylmethyl)-1,3-dimethylindolin-2-one (3ga)

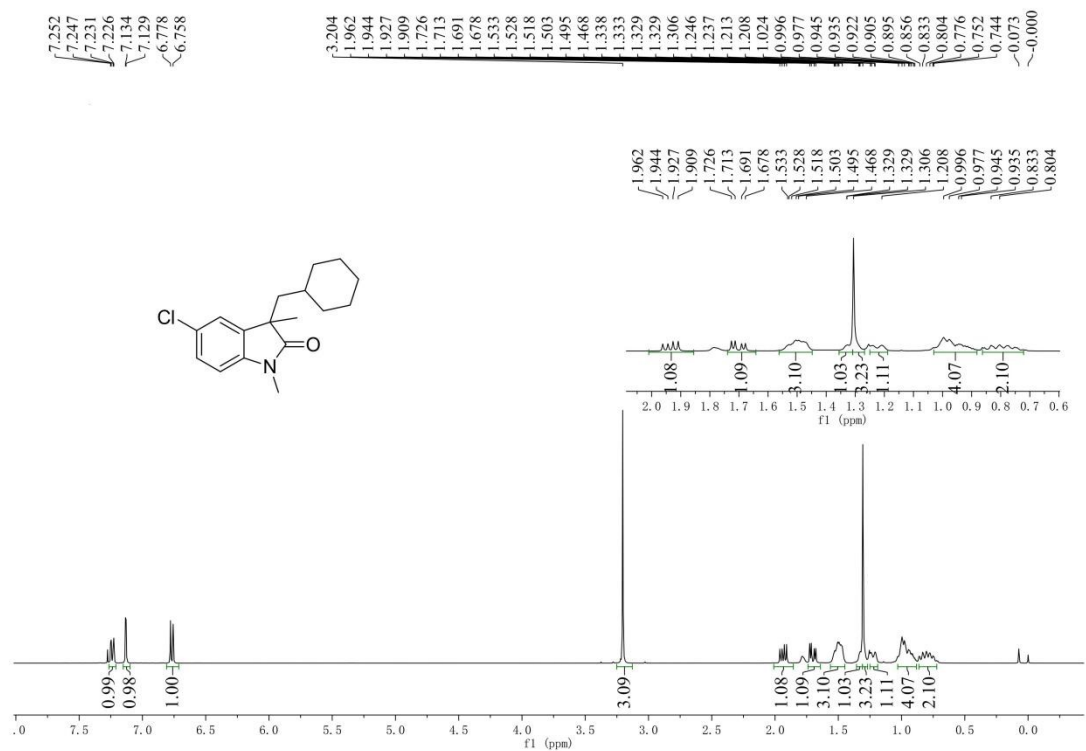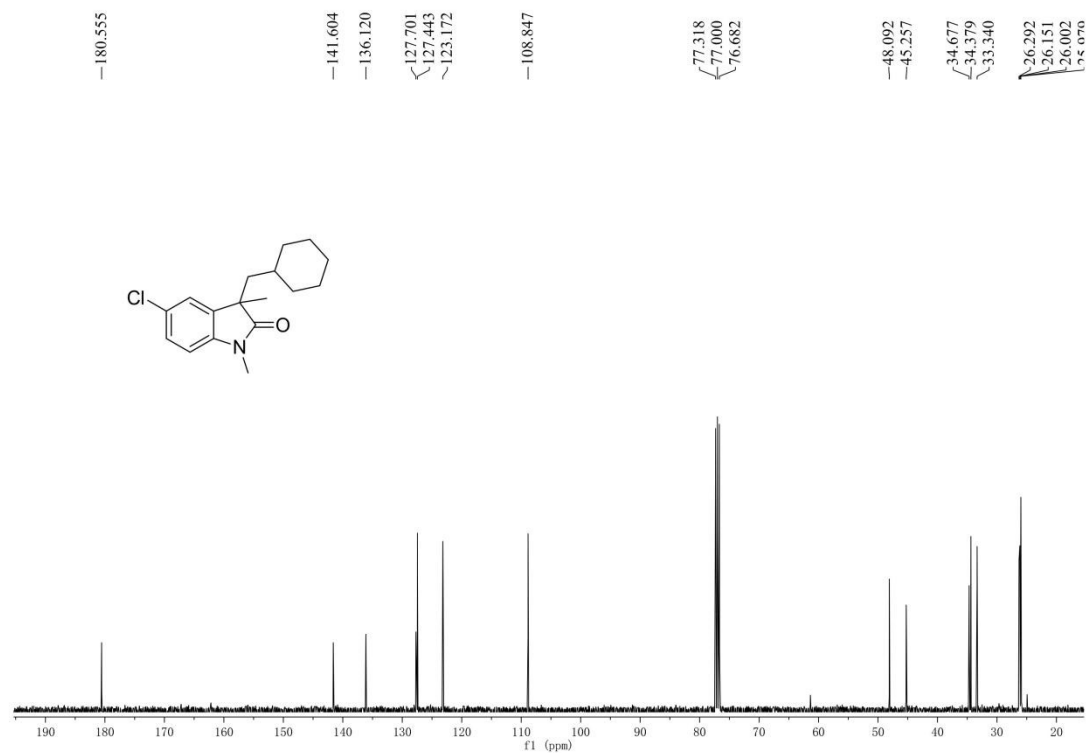

### 5-Bromo-3-(cyclohexylmethyl)-1,3-dimethylindolin-2-one (3ha)

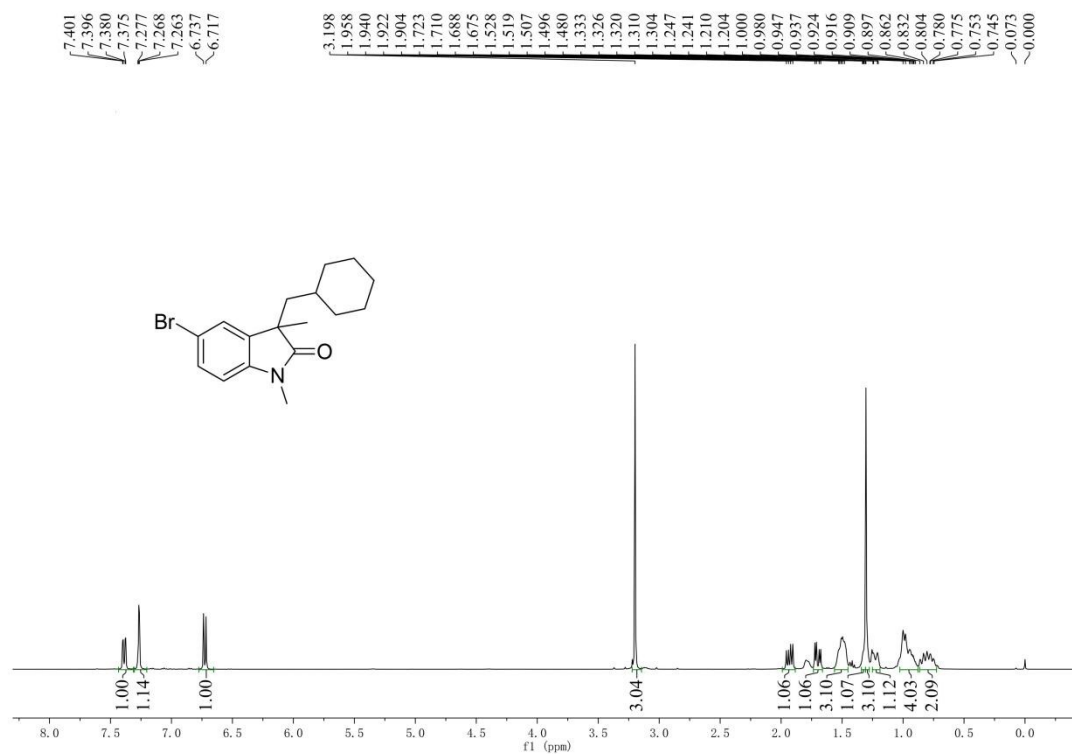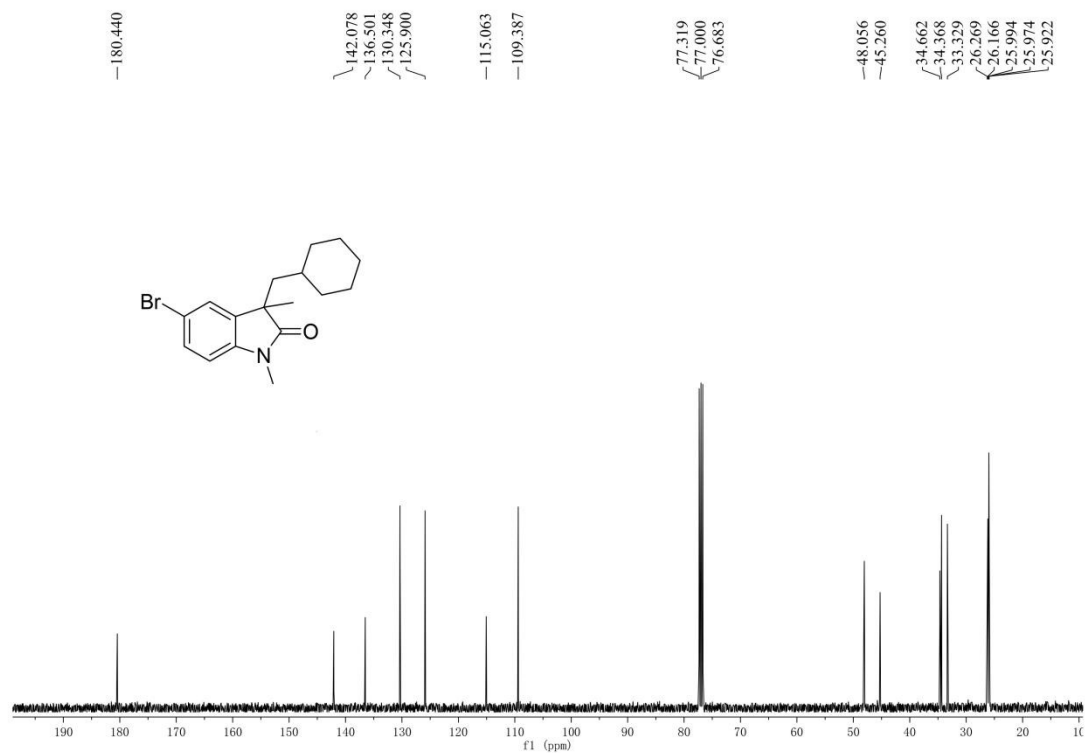

### 3-(Cyclohexylmethyl)-5-iodo-1,3-dimethylindolin-2-one (3ia)

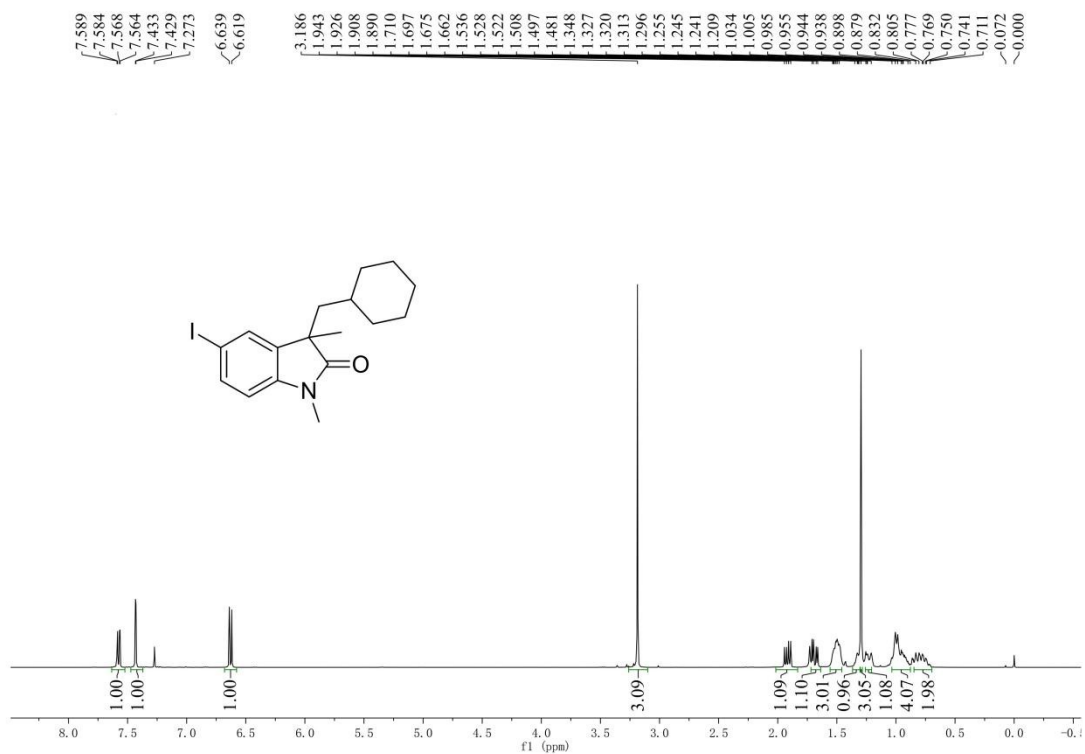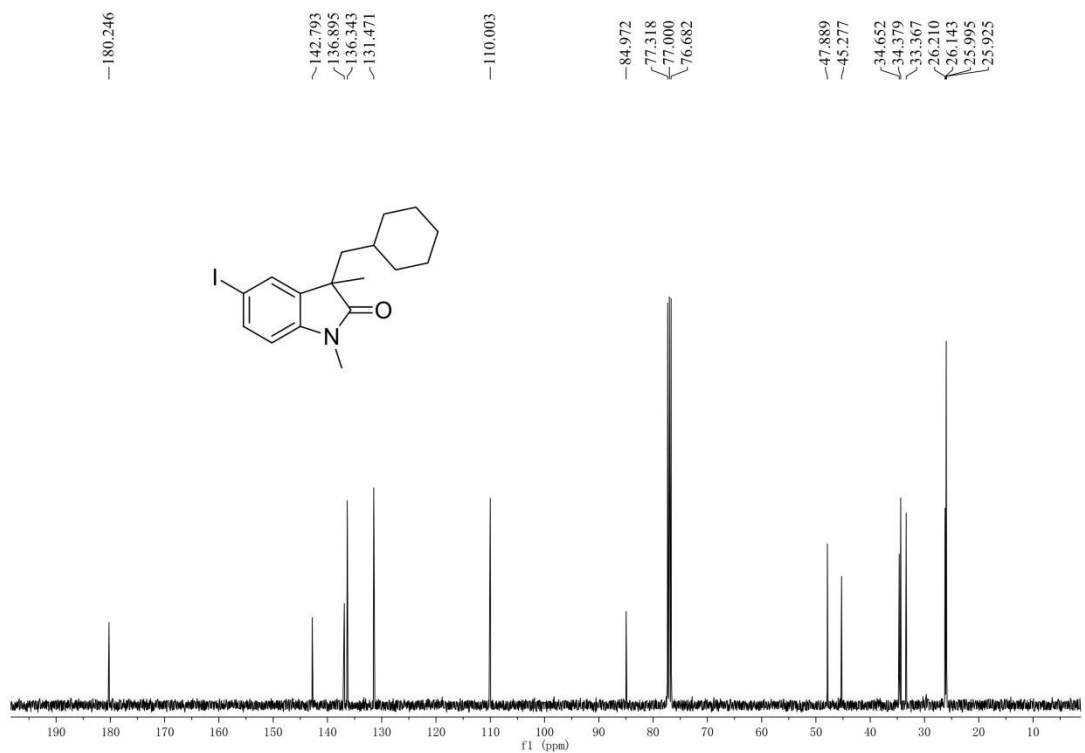

### 3-(Cyclohexylmethyl)-1,3-dimethyl-5-(trifluoromethyl)indolin-2-one (3ja)

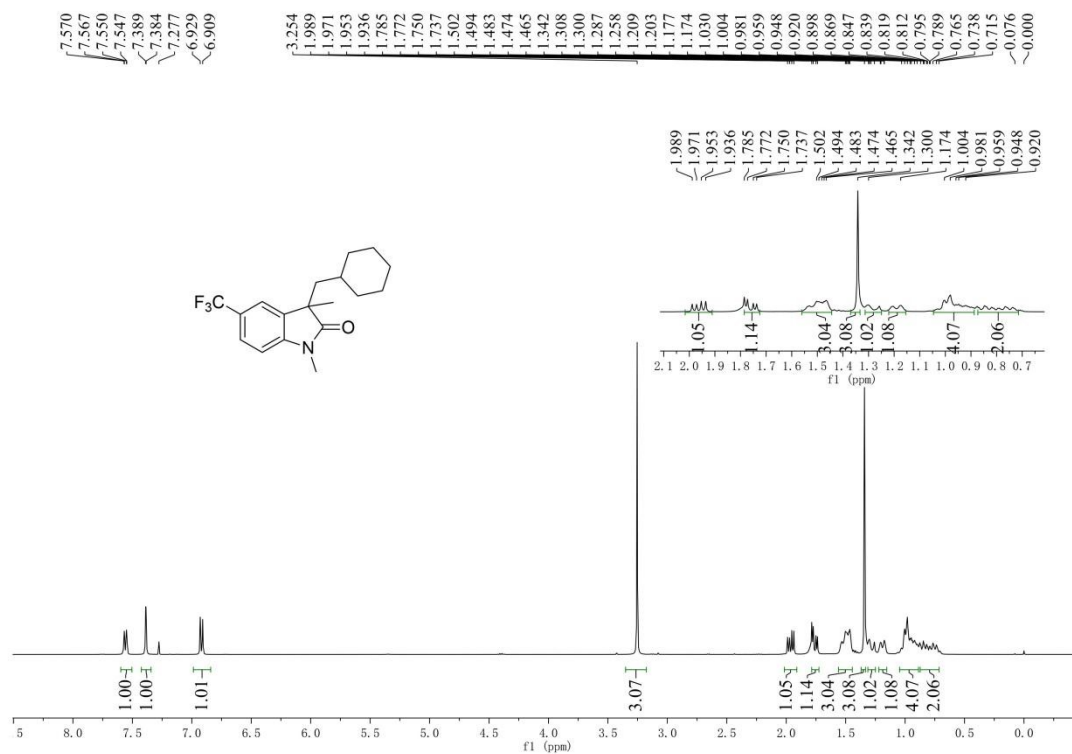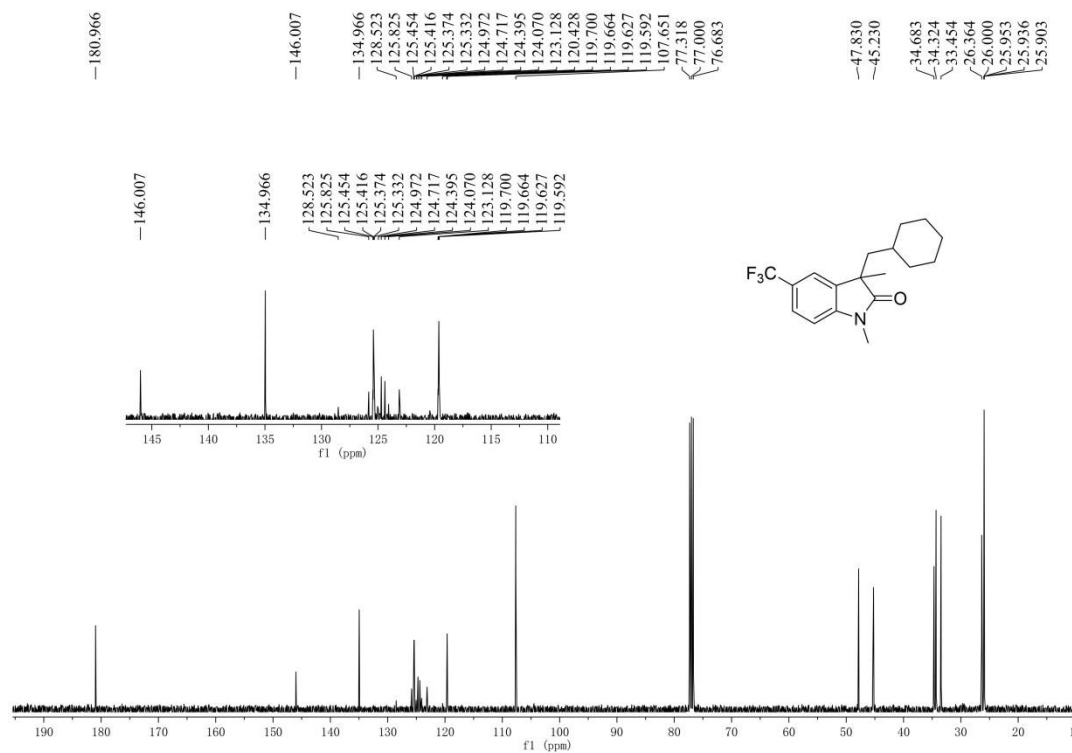

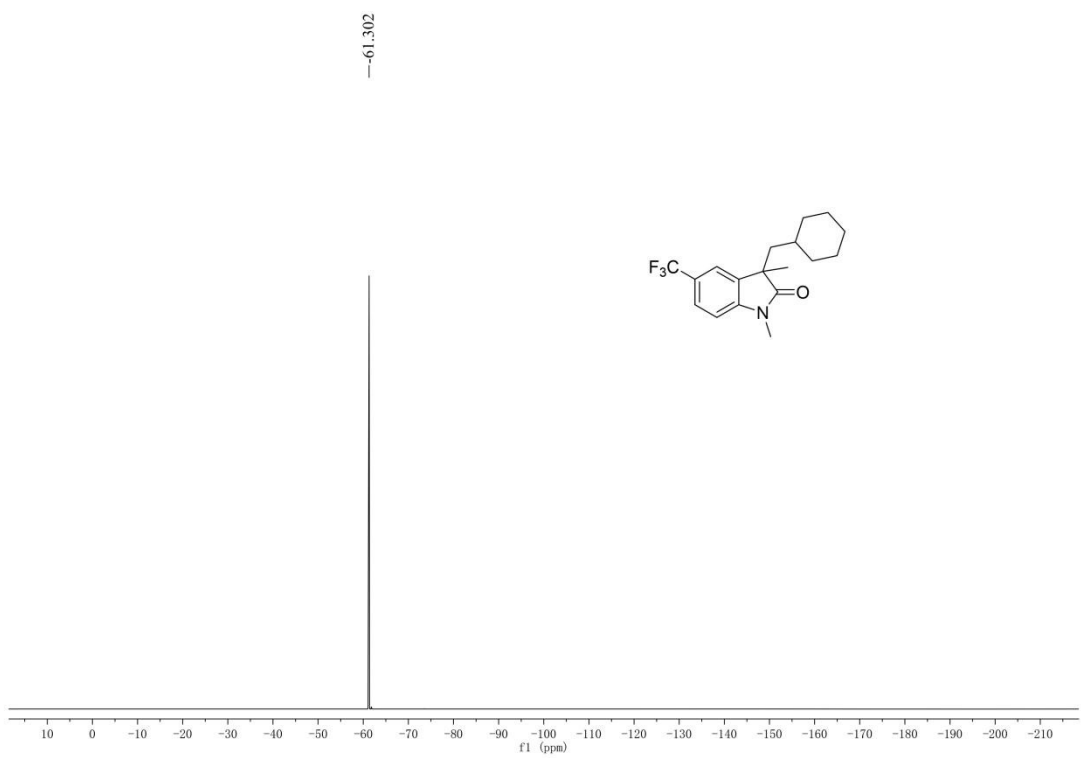

# Ethyl 3-(cyclohexylmethyl)-1,3-dimethyl-2-oxindoline-5-carboxylate (3ka)

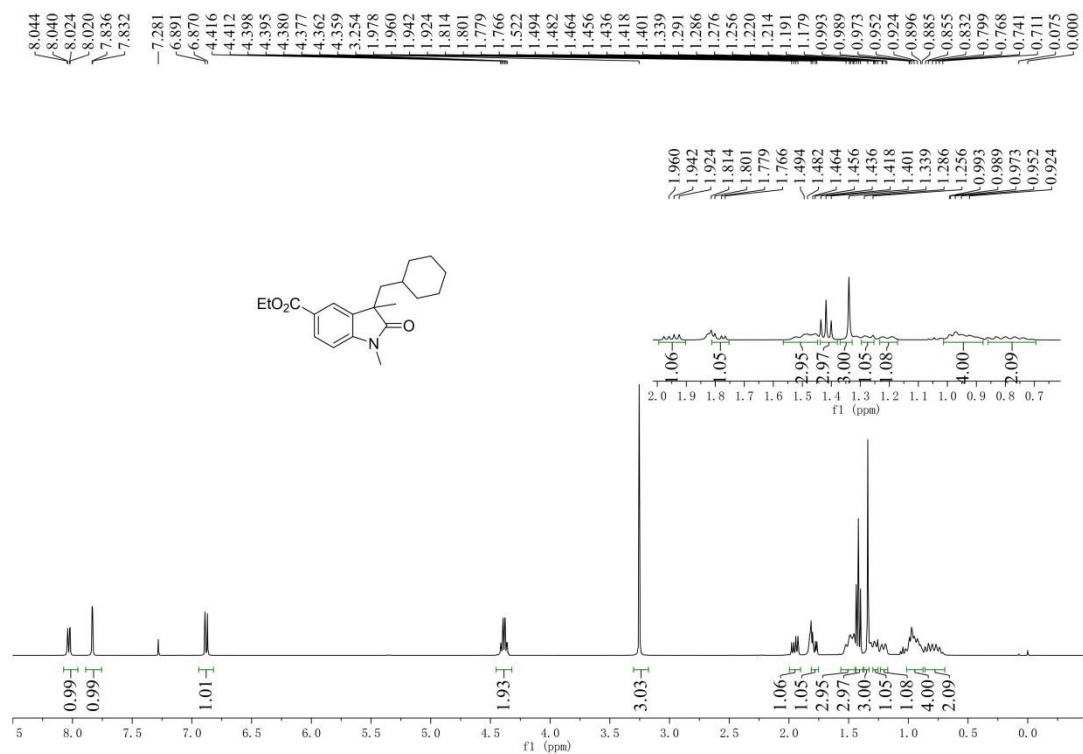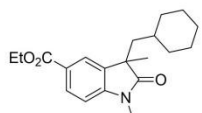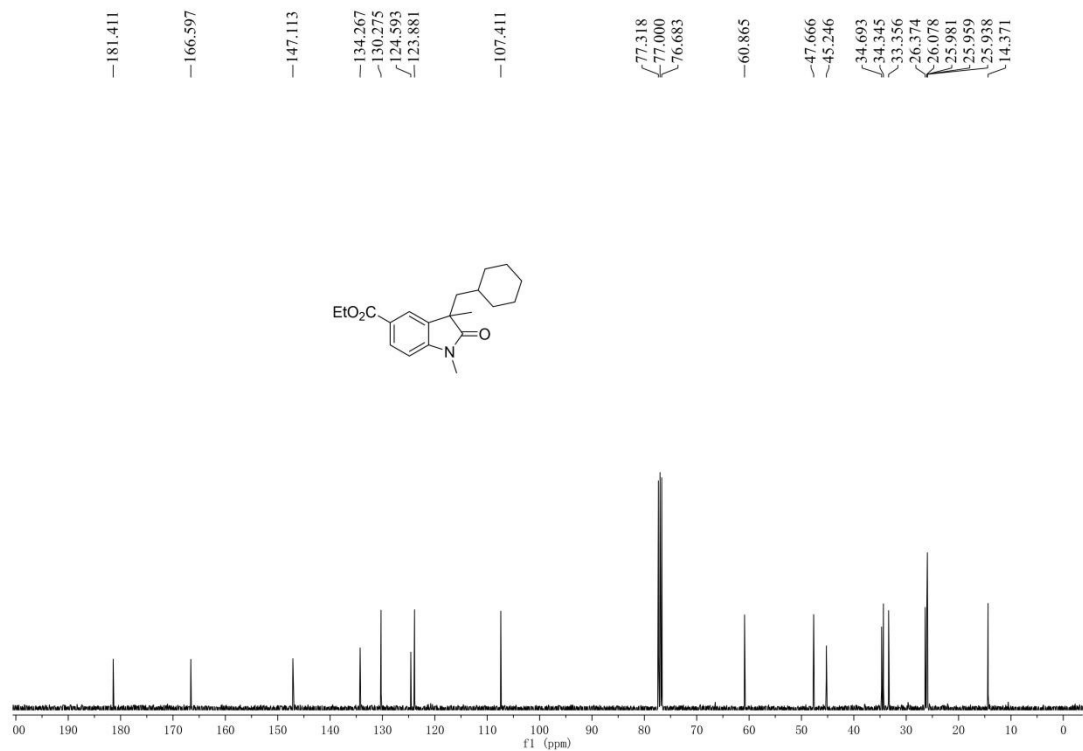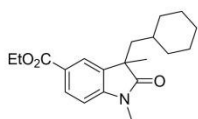

### 3-(Cyclohexylmethyl)-6-methoxy-1,3-dimethylindolin-2-one (31a)

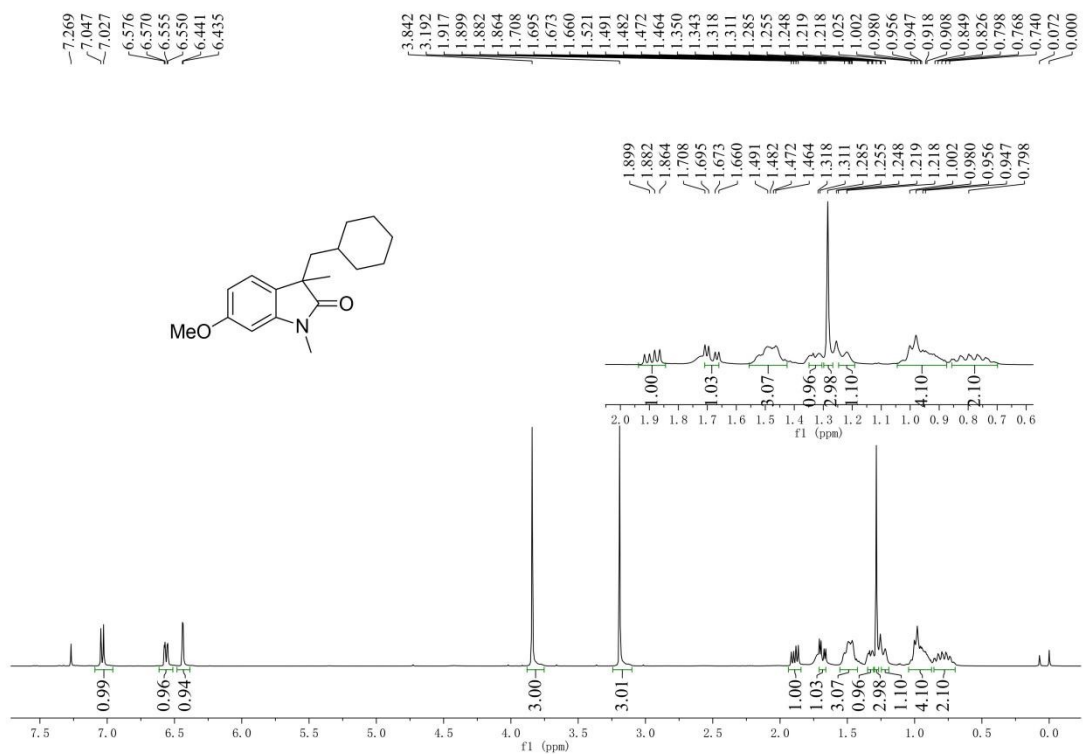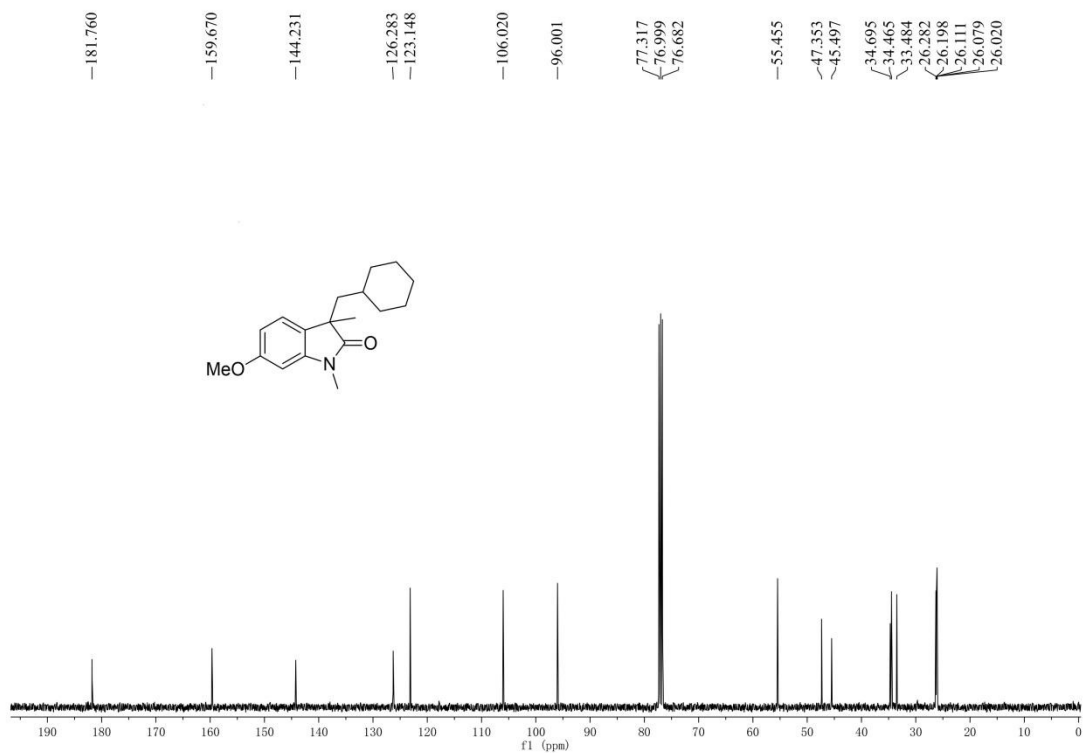

### 3-(Cyclohexylmethyl)-4-methoxy-1,3-dimethylindolin-2-one (3la')

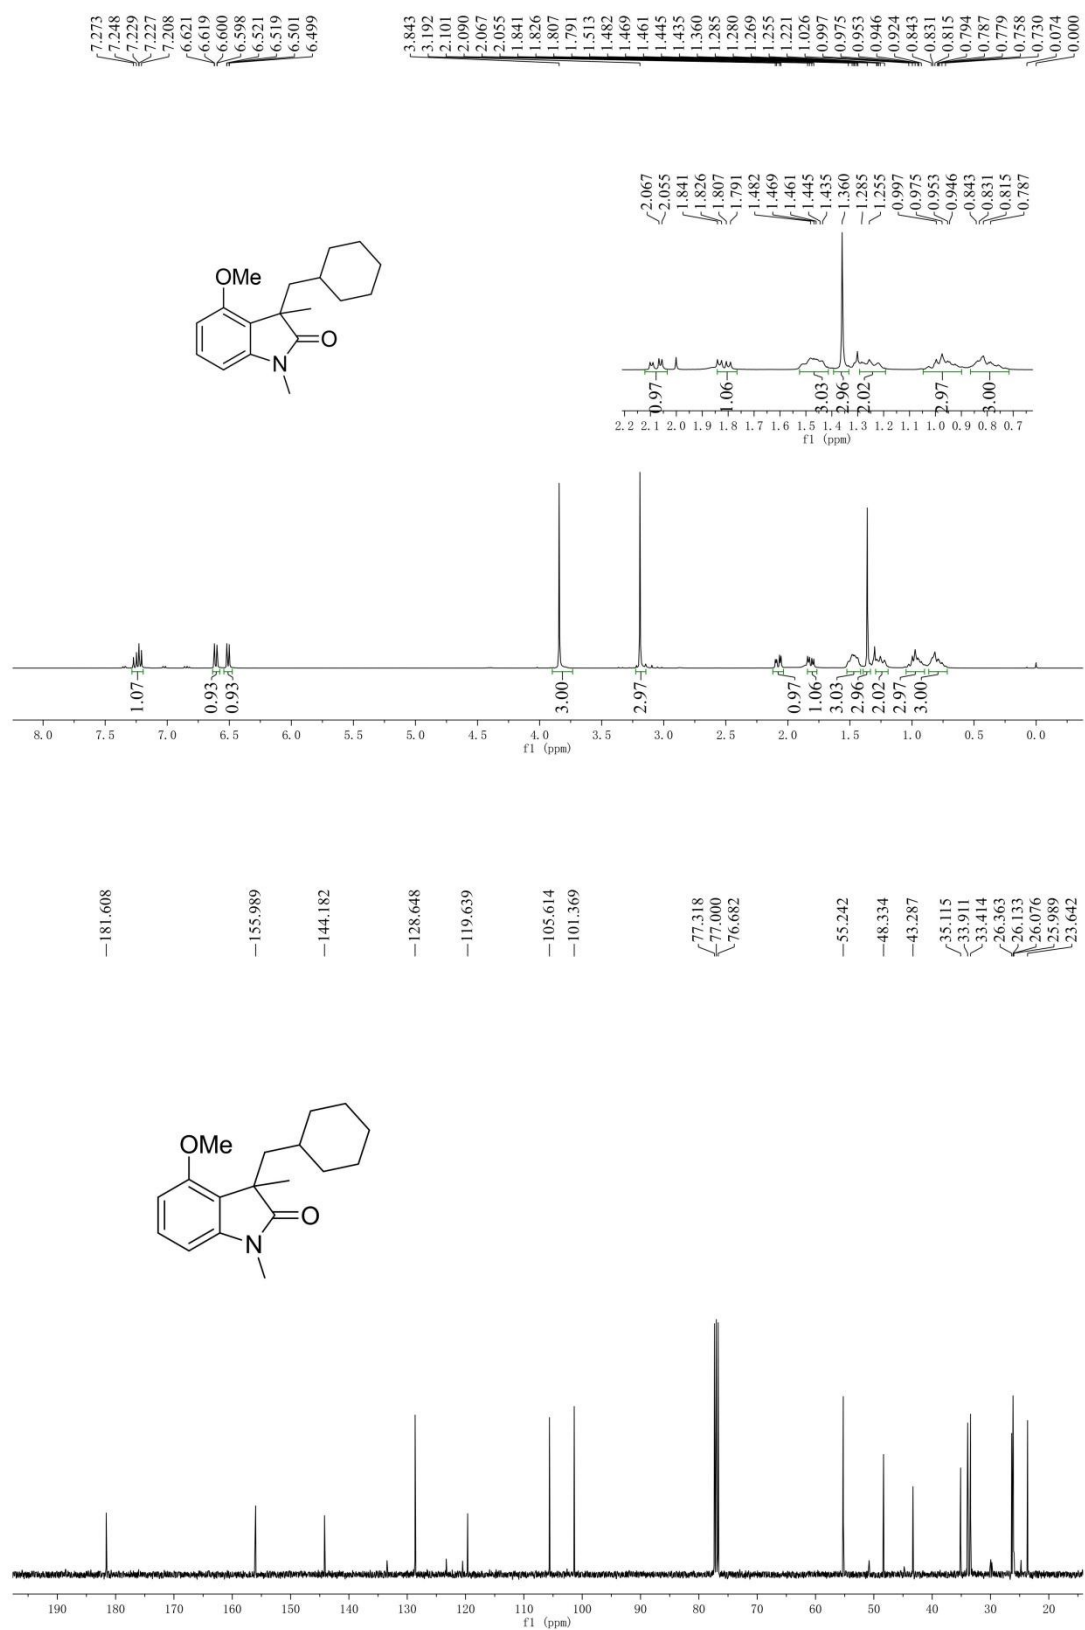



### 6-Chloro-3-(cyclohexylmethyl)-1,3-dimethylindolin-2-one (3ma)

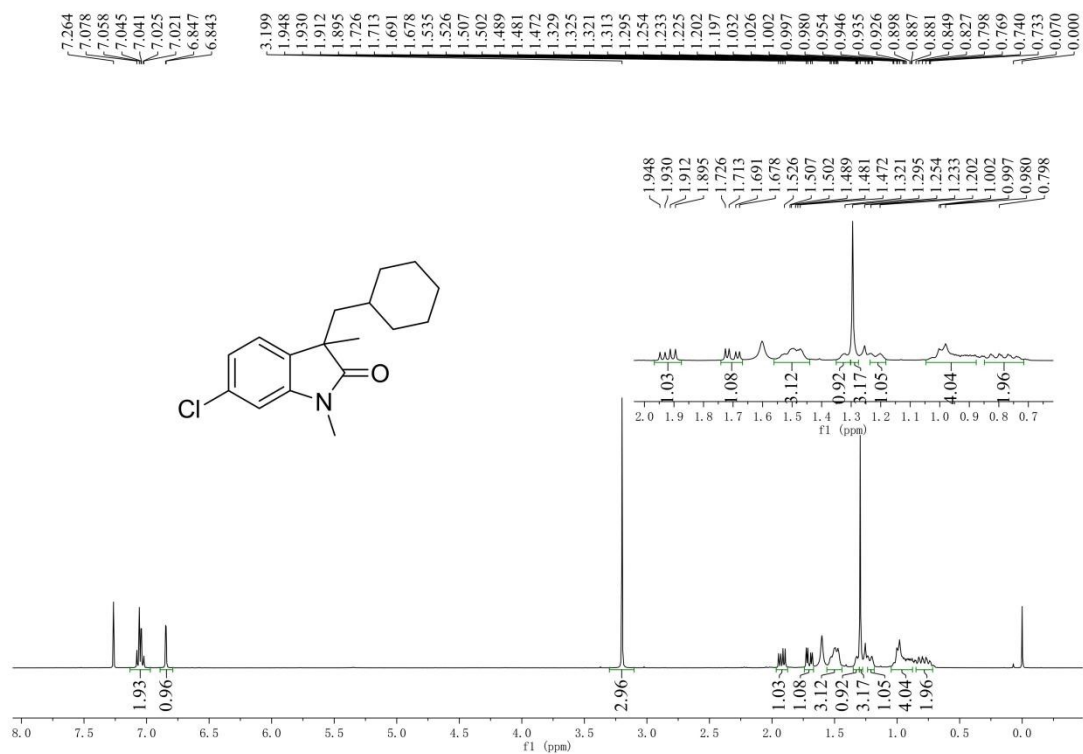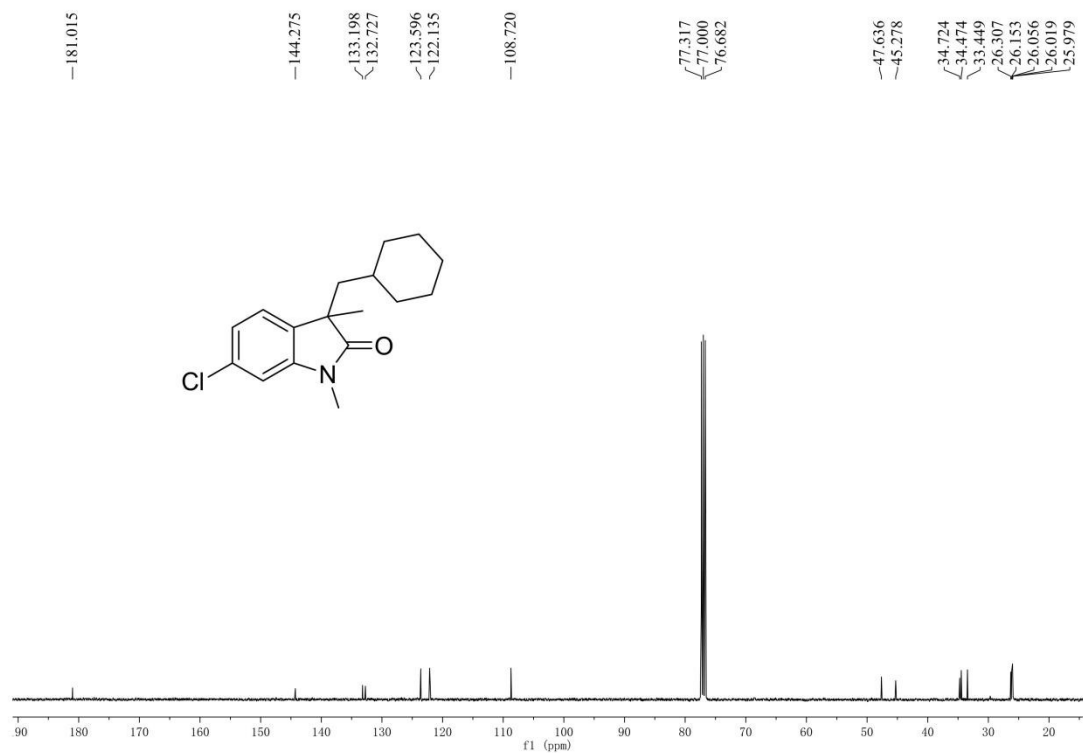

### 4-chloro-3-(cyclohexylmethyl)-1,3-dimethylindolin-2-one (3ma')

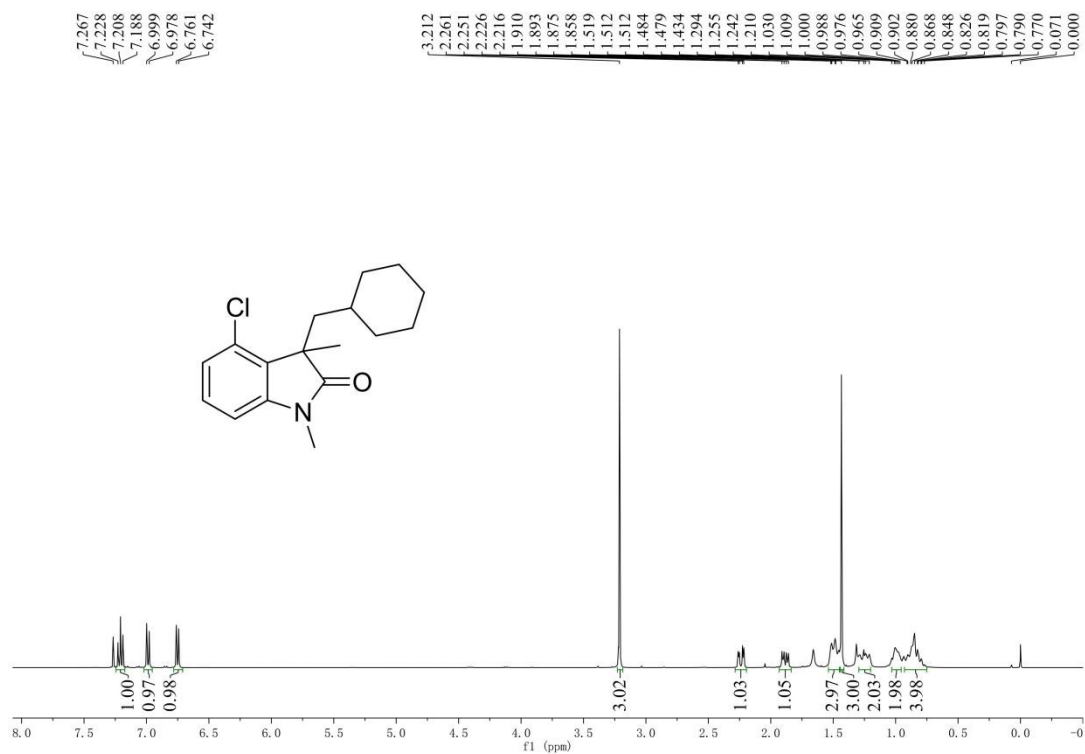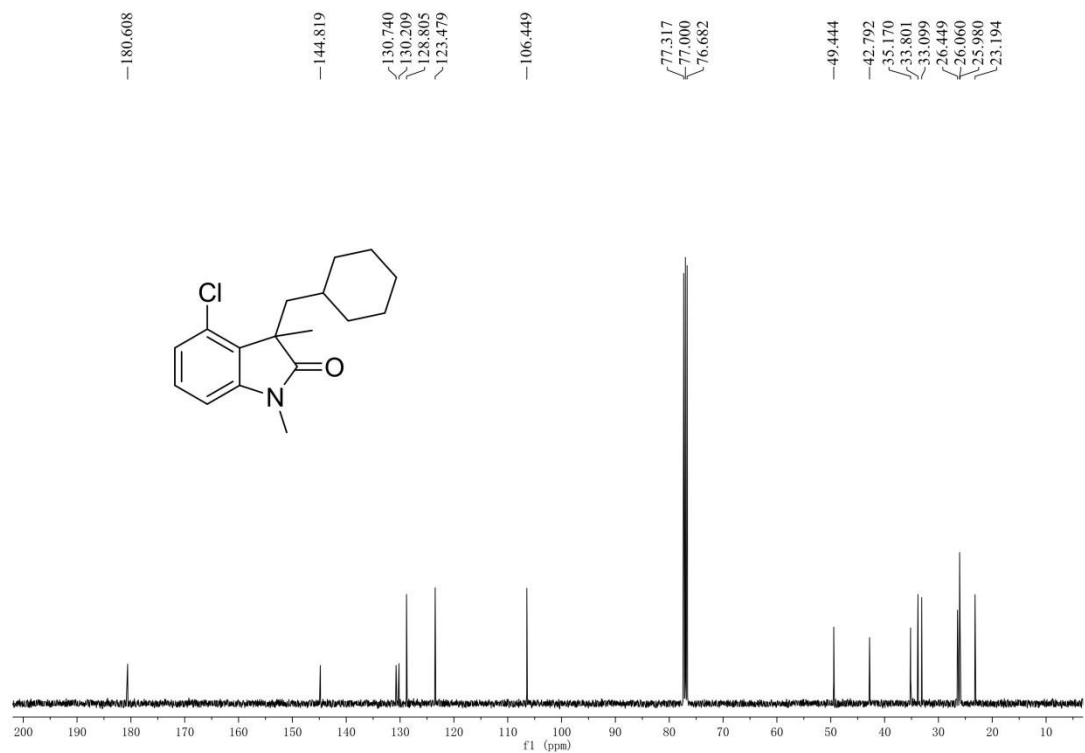

**(Cyclohexylmethyl)-1,3,6-trimethylindolin-2-one (3na) and 3-  
(Cyclohexylmethyl)-1,3,4-trimethylindolin-2-one (3na')**

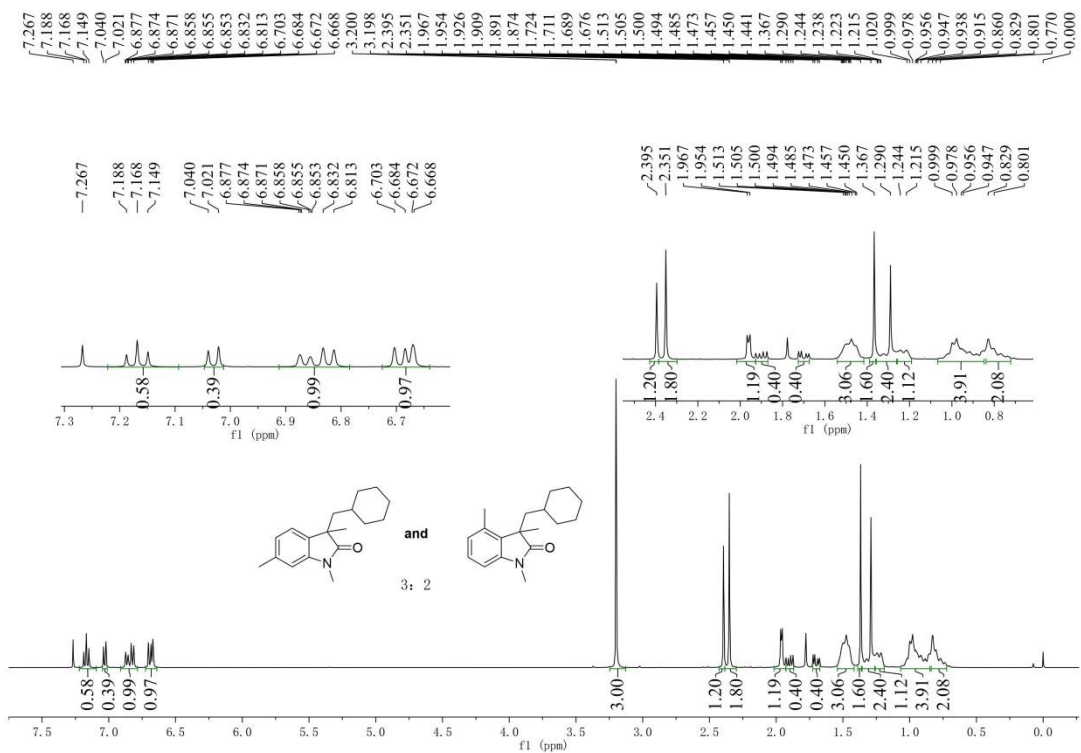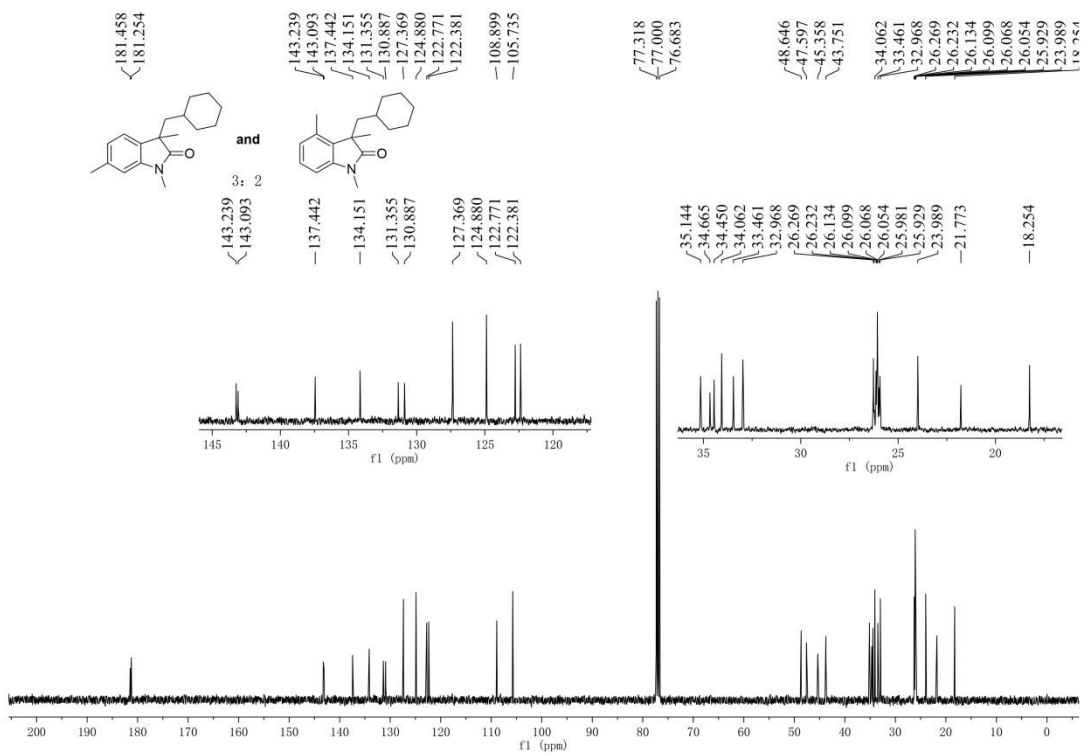

### 3-(Cyclohexylmethyl)-7-methoxy-1,3-dimethylindolin-2-one (30a)

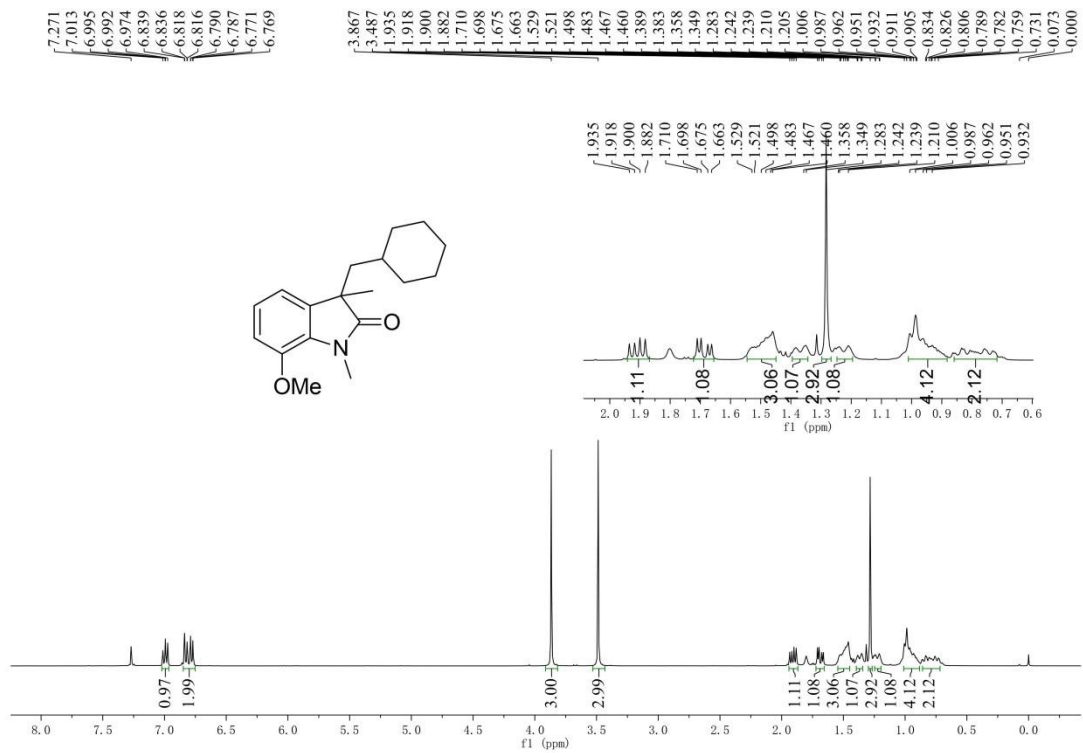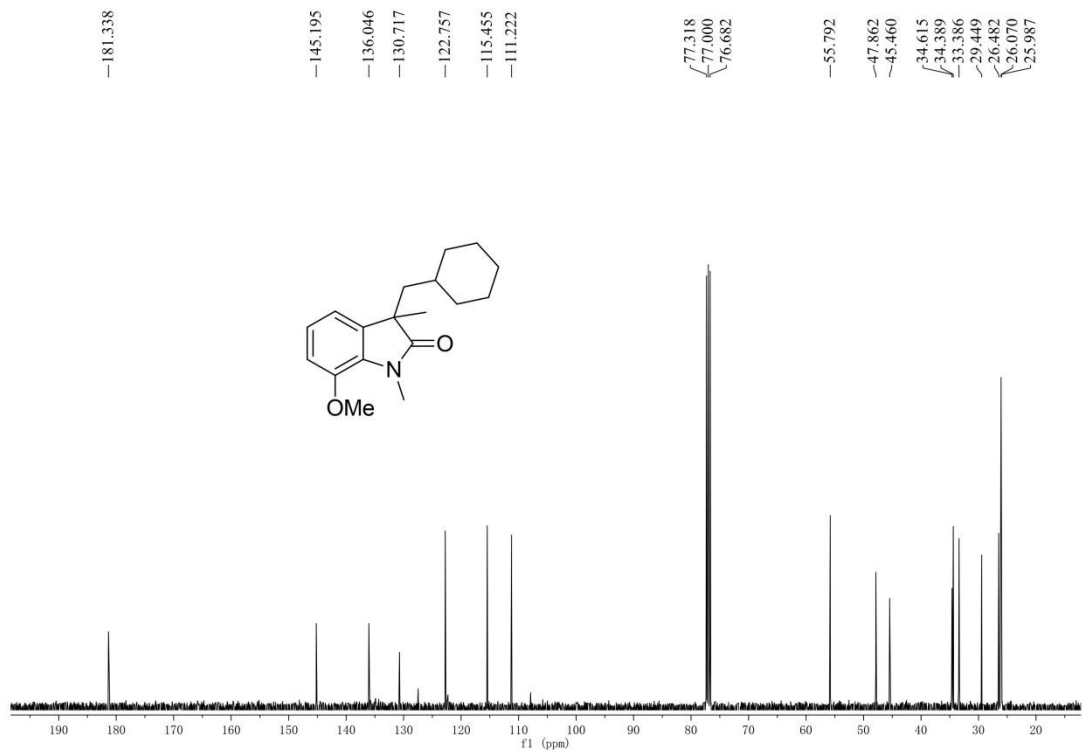

### 3-(Cyclohexylmethyl)-1,3,7-trimethylindolin-2-one (3pa)

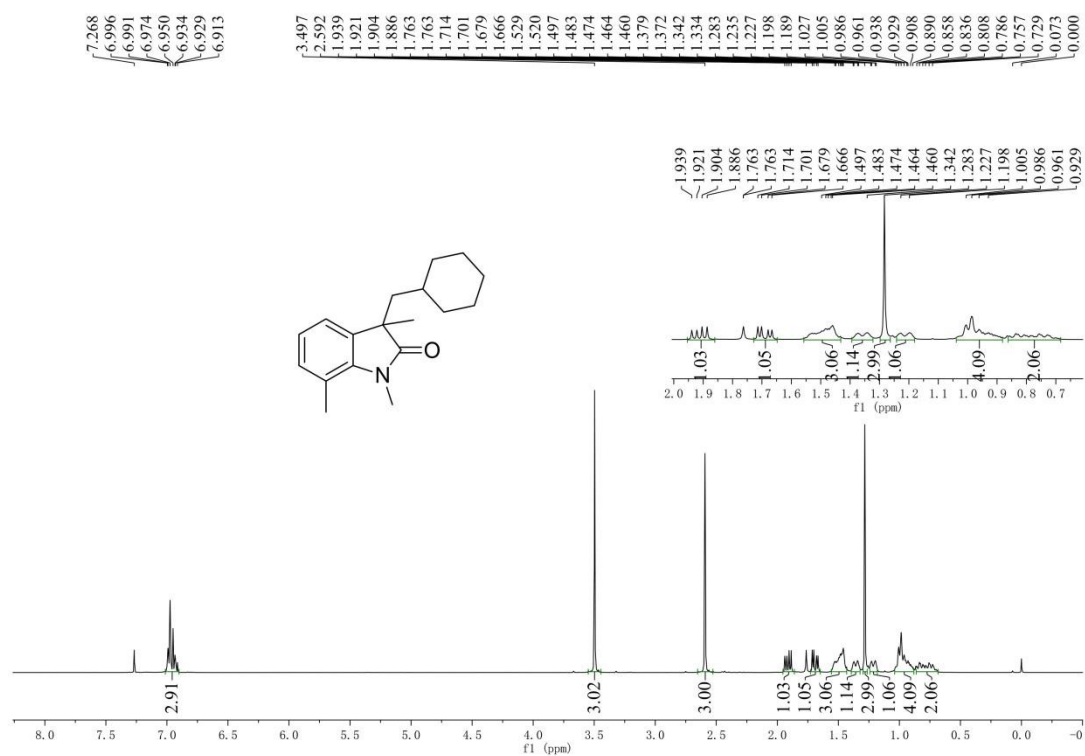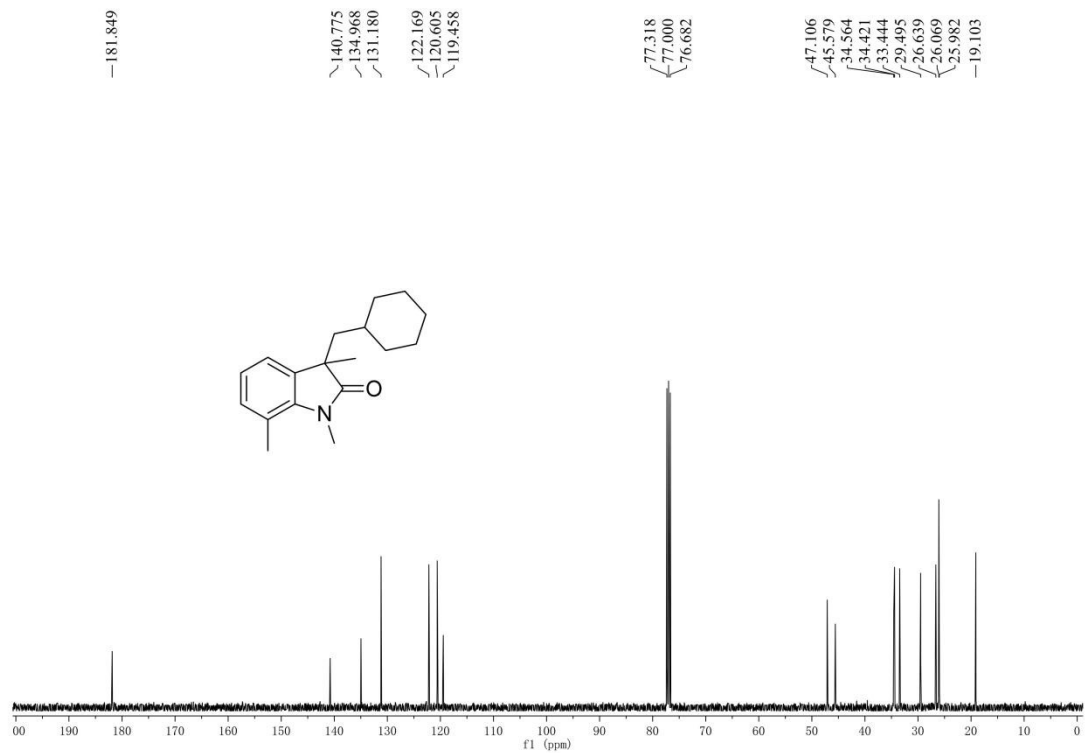

### 3-(Cyclohexylmethyl)-7-iodo-1,3-dimethylindolin-2-one (3qa)

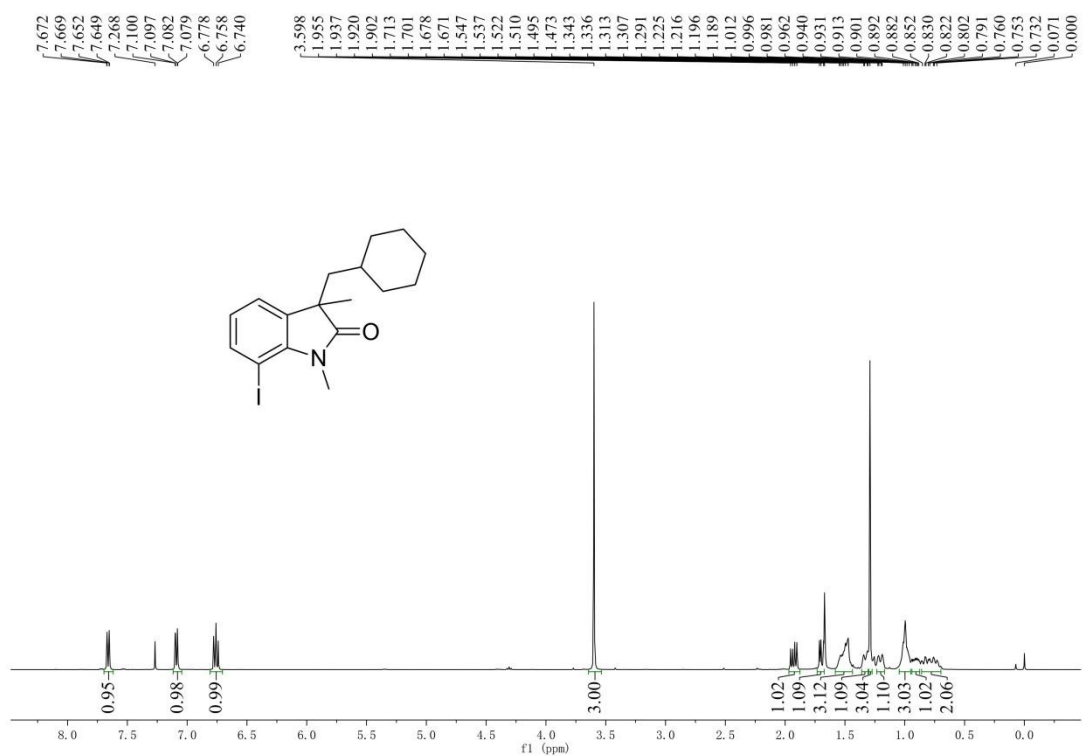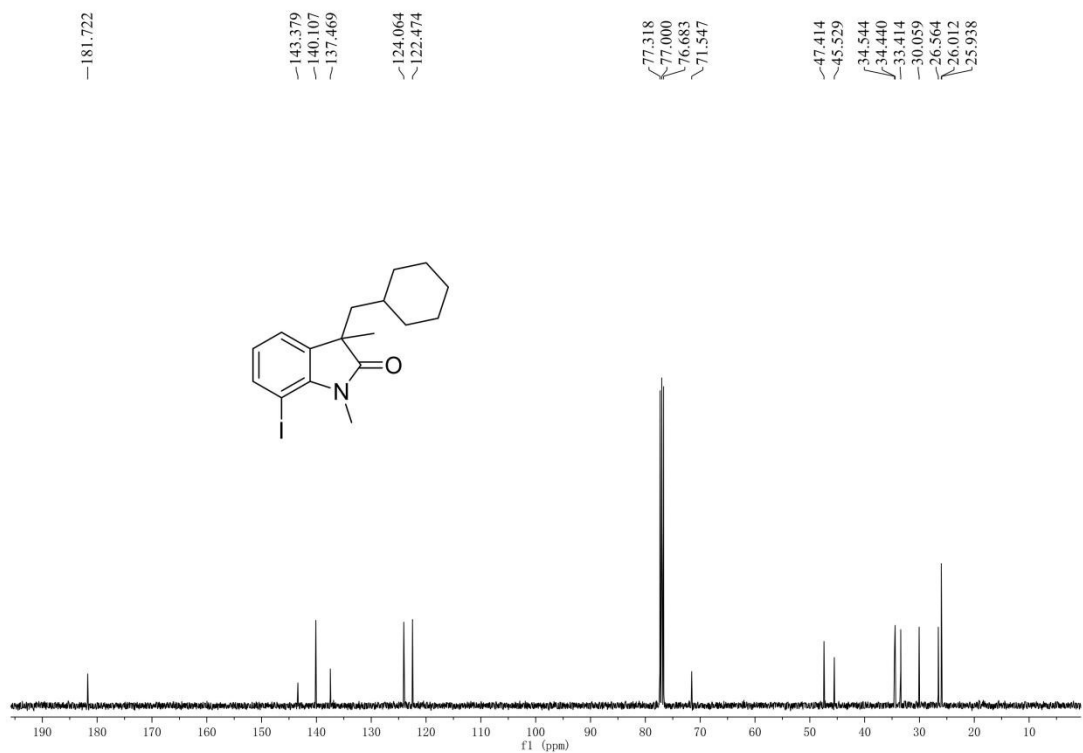

**3-(Cyclohexylmethyl)-1,3-dimethyl-1H-pyrrolo[2,3-b]pyridin-2(3H)-one  
(3ra)**

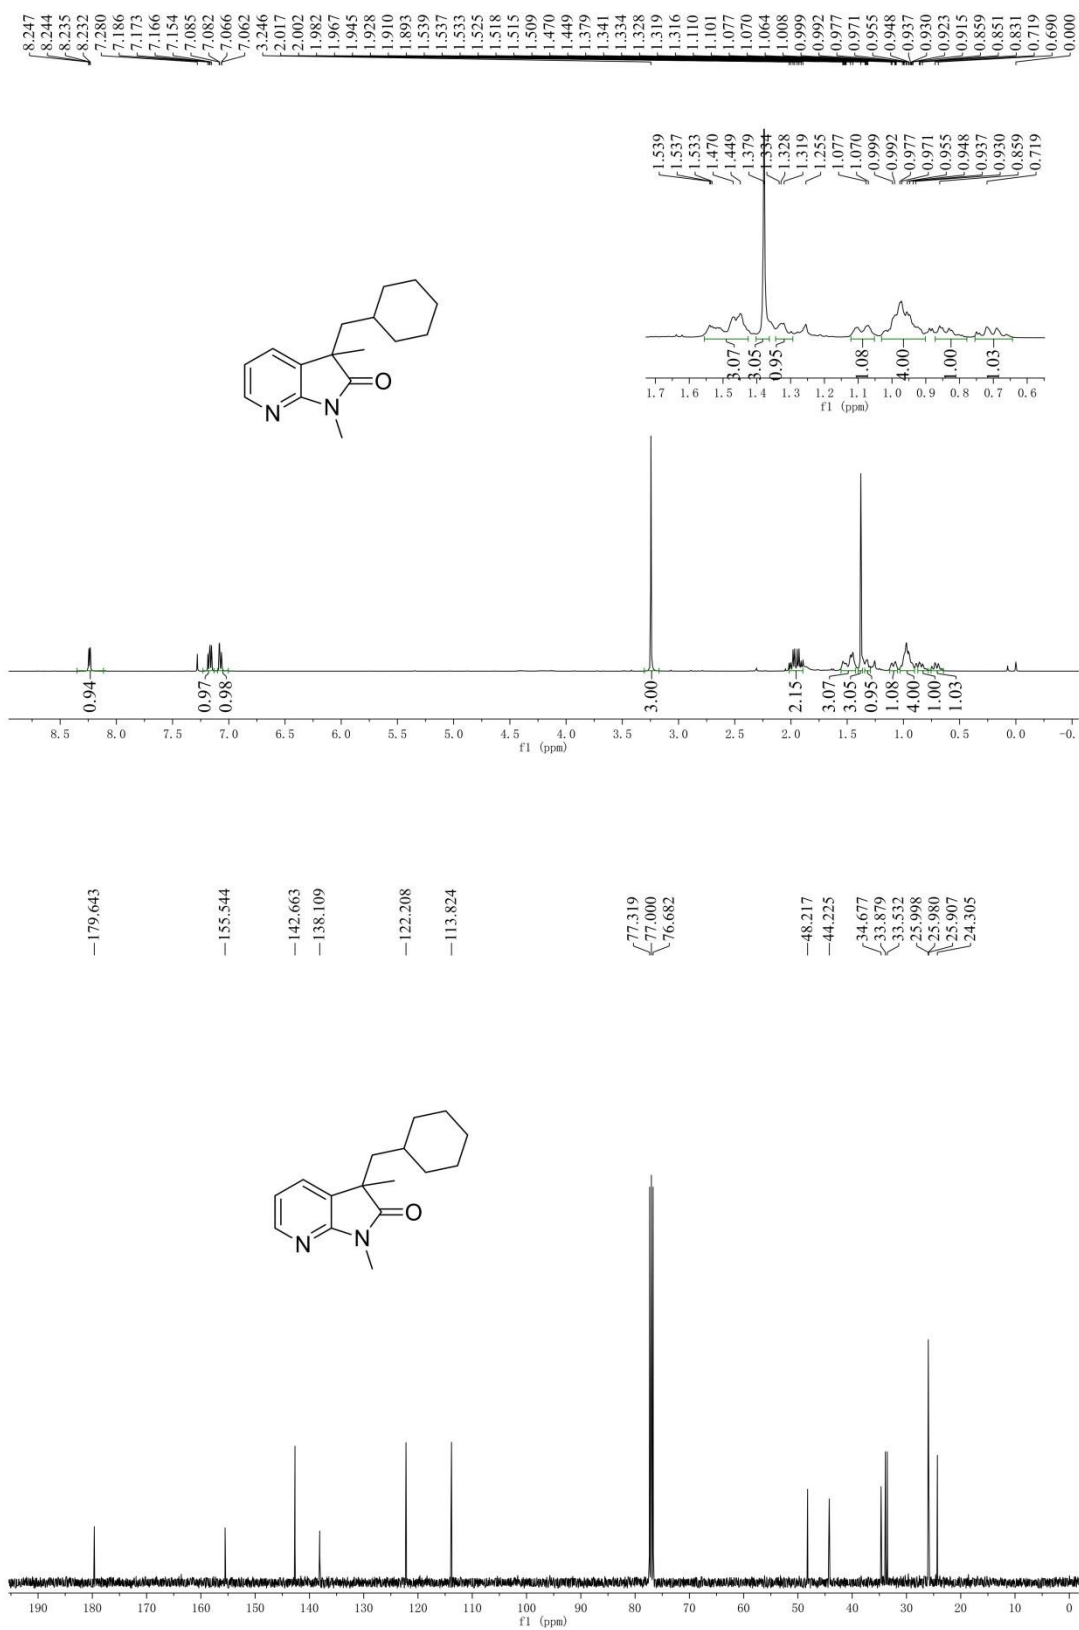

### 3-(Cyclohexylmethyl)-1,3-dimethyl-1H-benzo[f]indol-2(3H)-one (3sa)

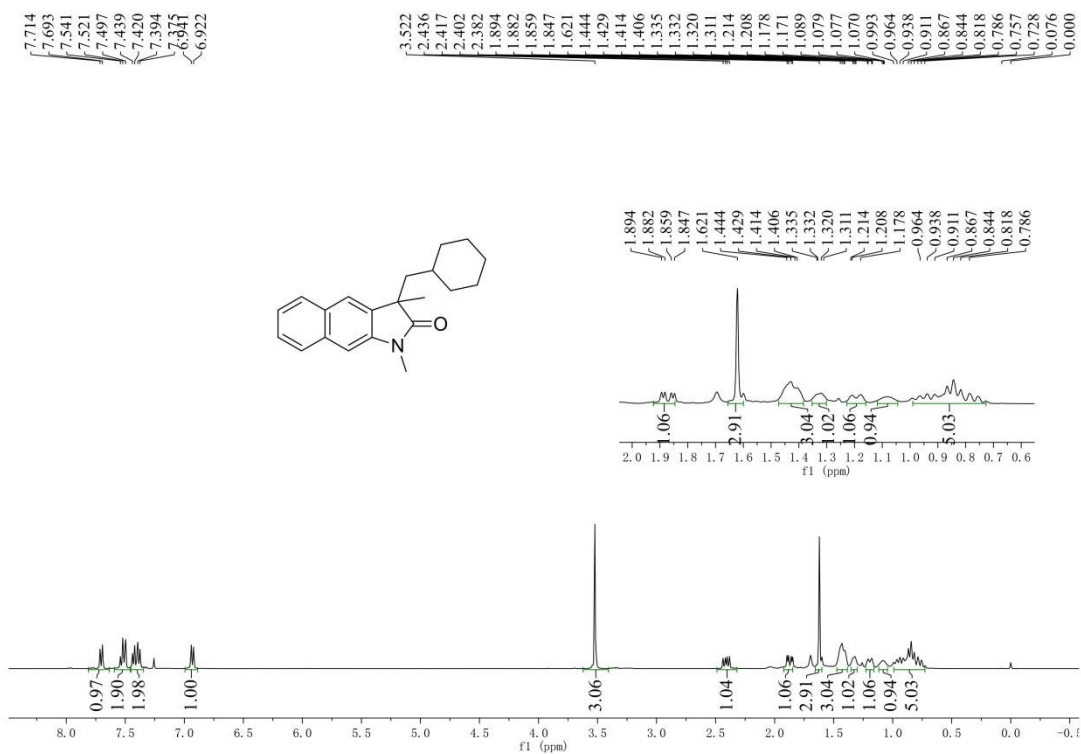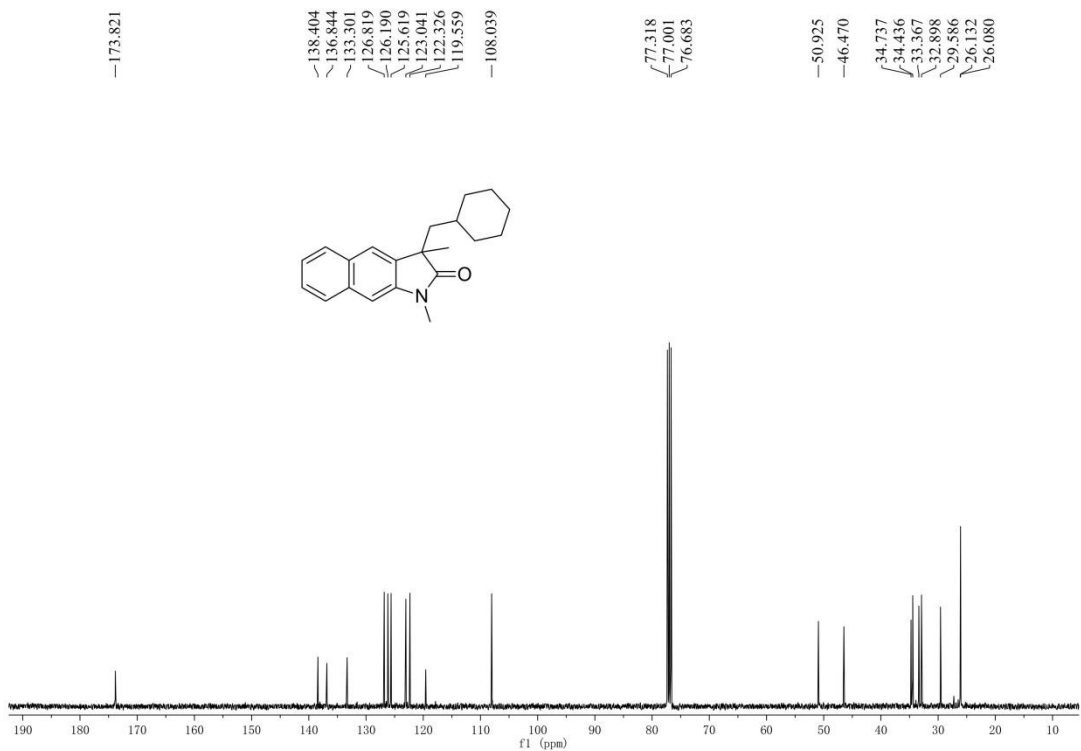



### 3-(Cyclohexylmethyl)-1-ethyl-3-methylindolin-2-one (3ta)

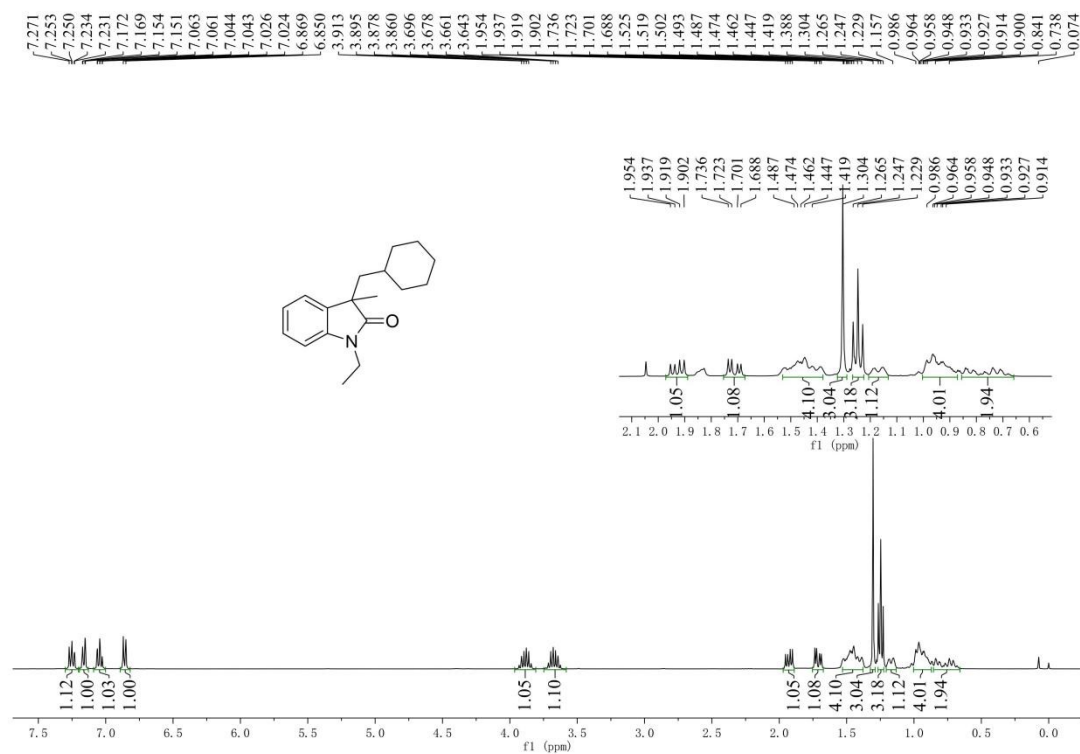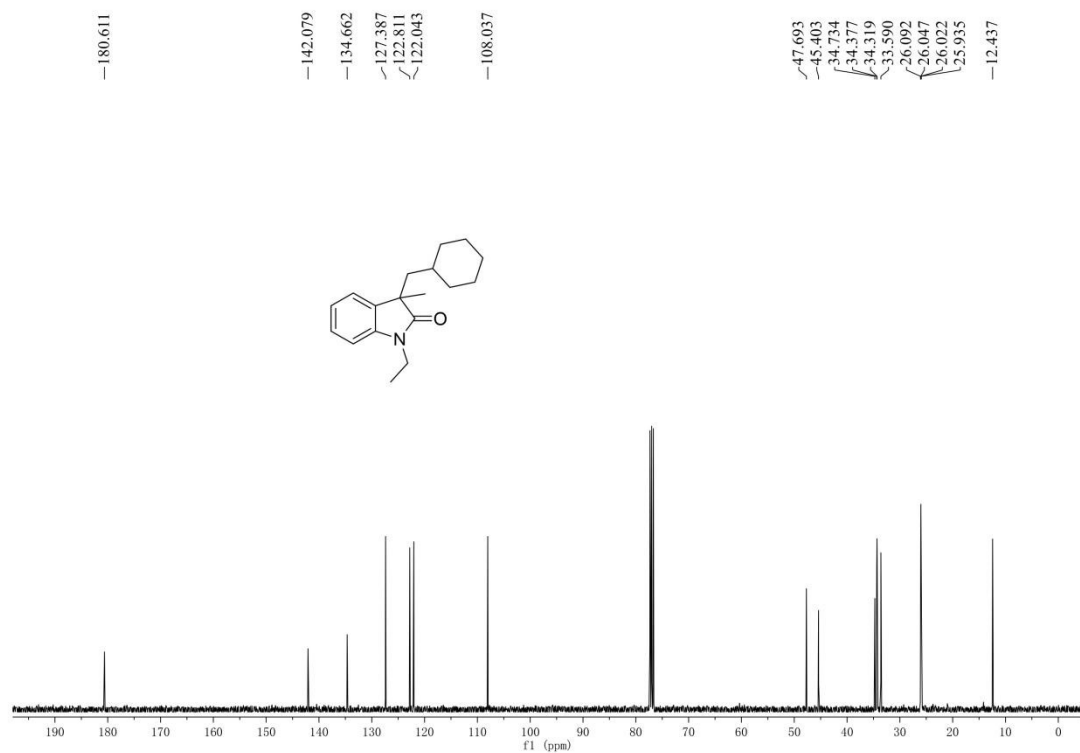

### 3-(Cyclohexylmethyl)-3-methyl-1-phenylindolin-2-one (3ua)

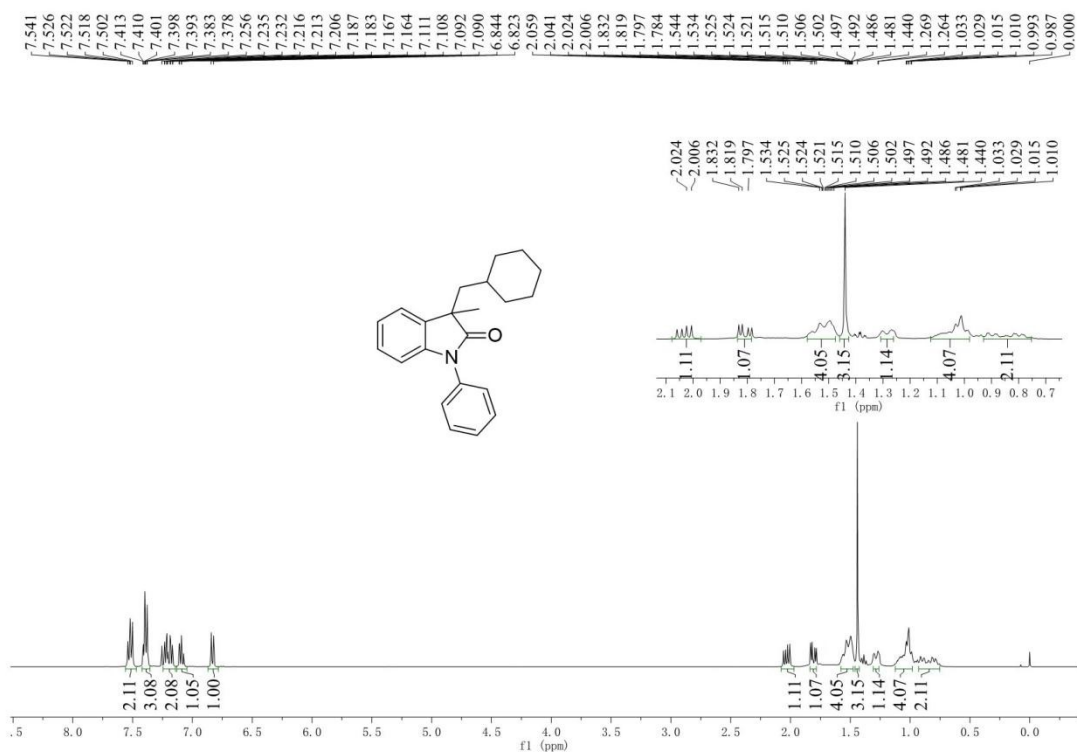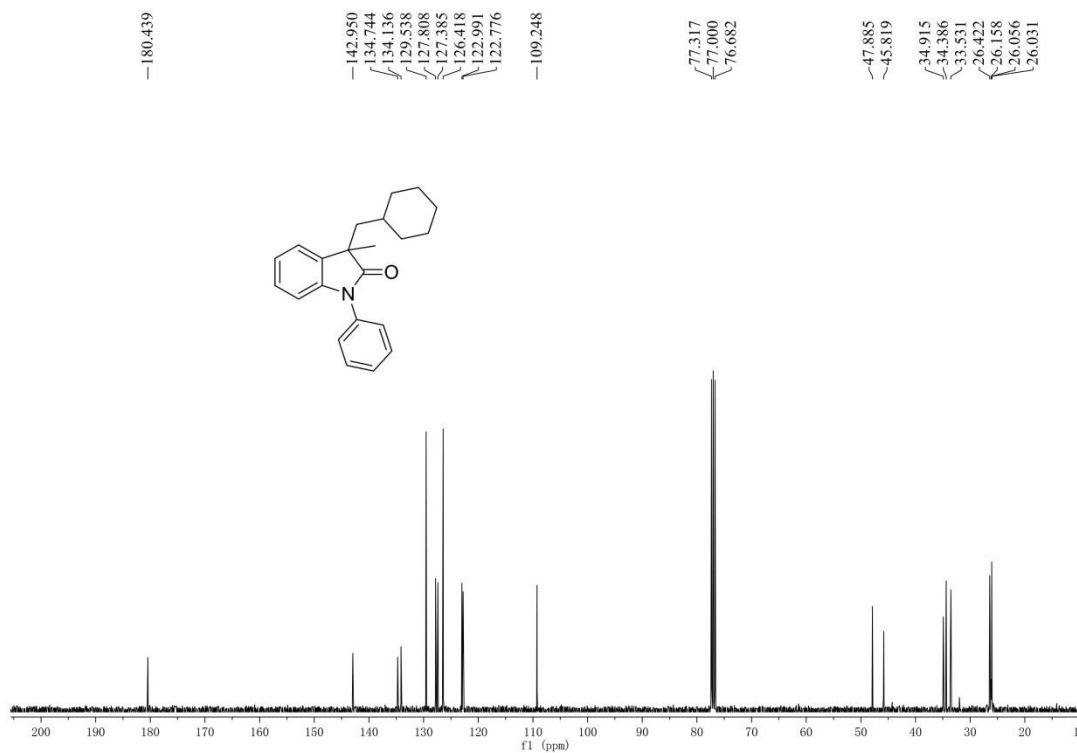

# 1-Benzyl-3-(cyclohexylmethyl)-3-methylindolin-2-one (3va)

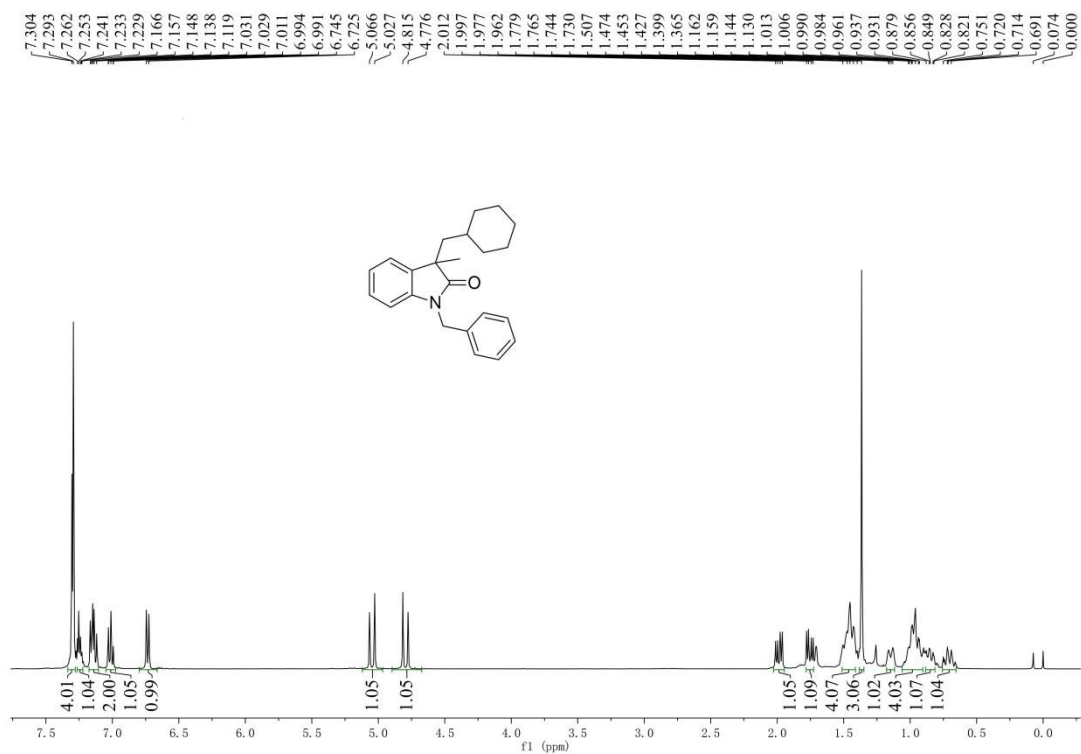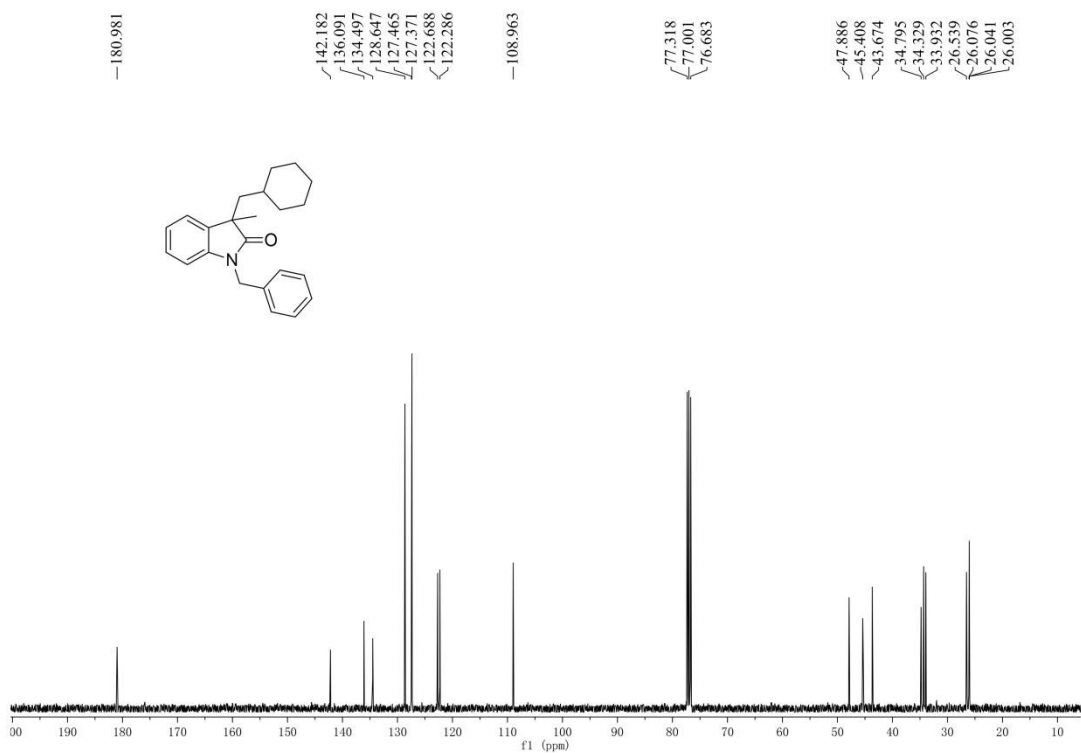

### 3-(Cyclohexylmethyl)-3-methyl-1-(4-methylbenzyl)indolin-2-one (3wa)

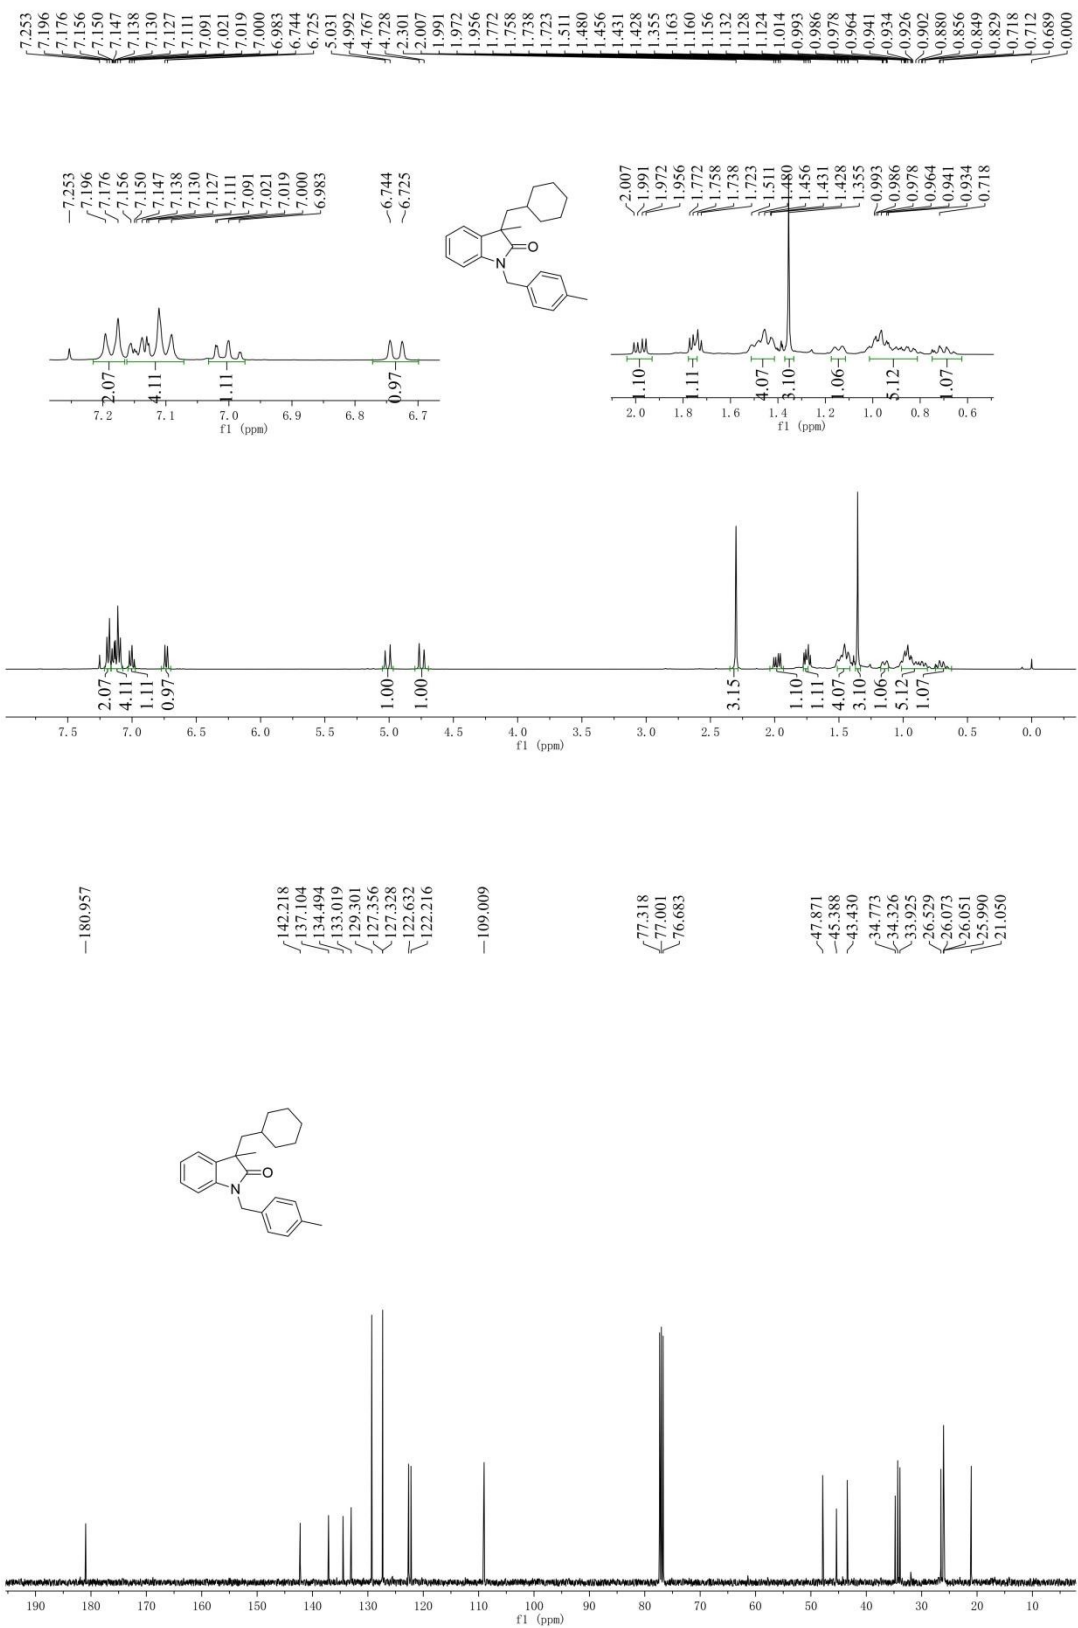

### 3-(Cyclohexylmethyl)-1-(4-fluorobenzyl)-3-methylindolin-2-one (3xa)

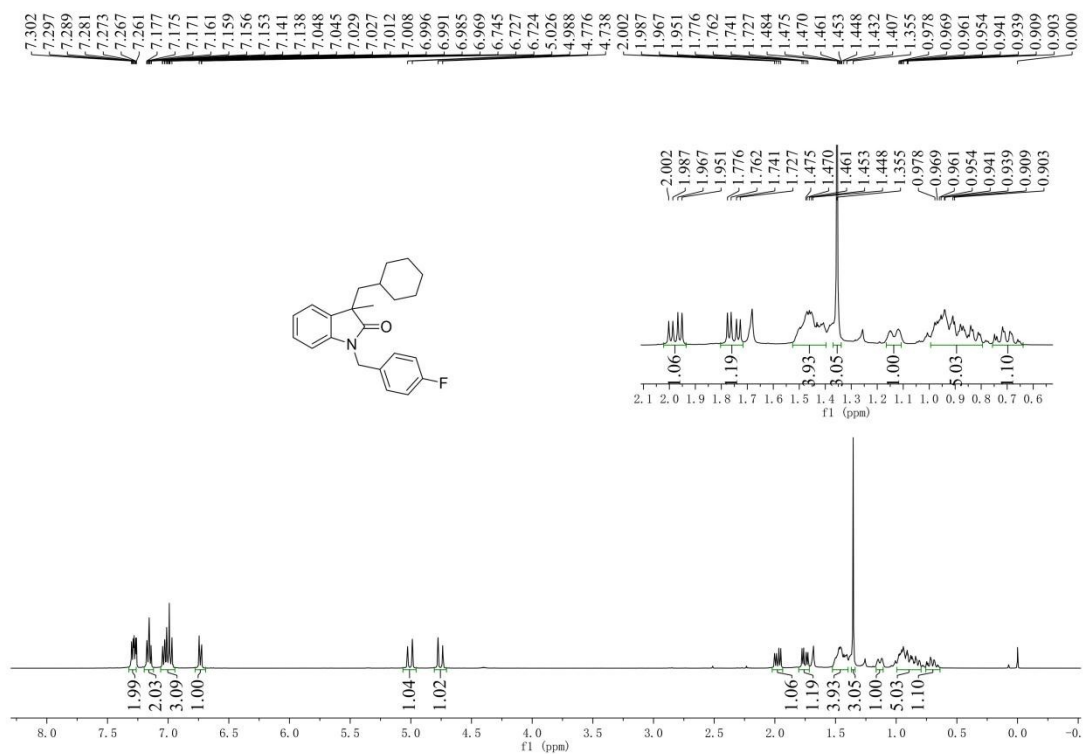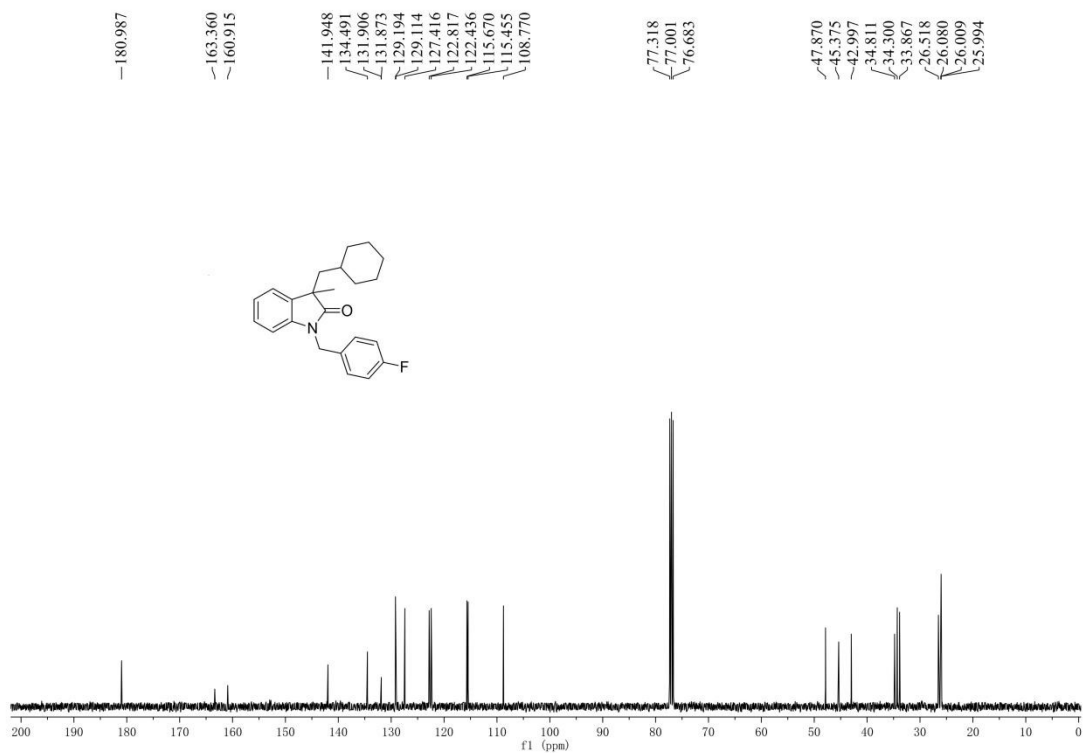

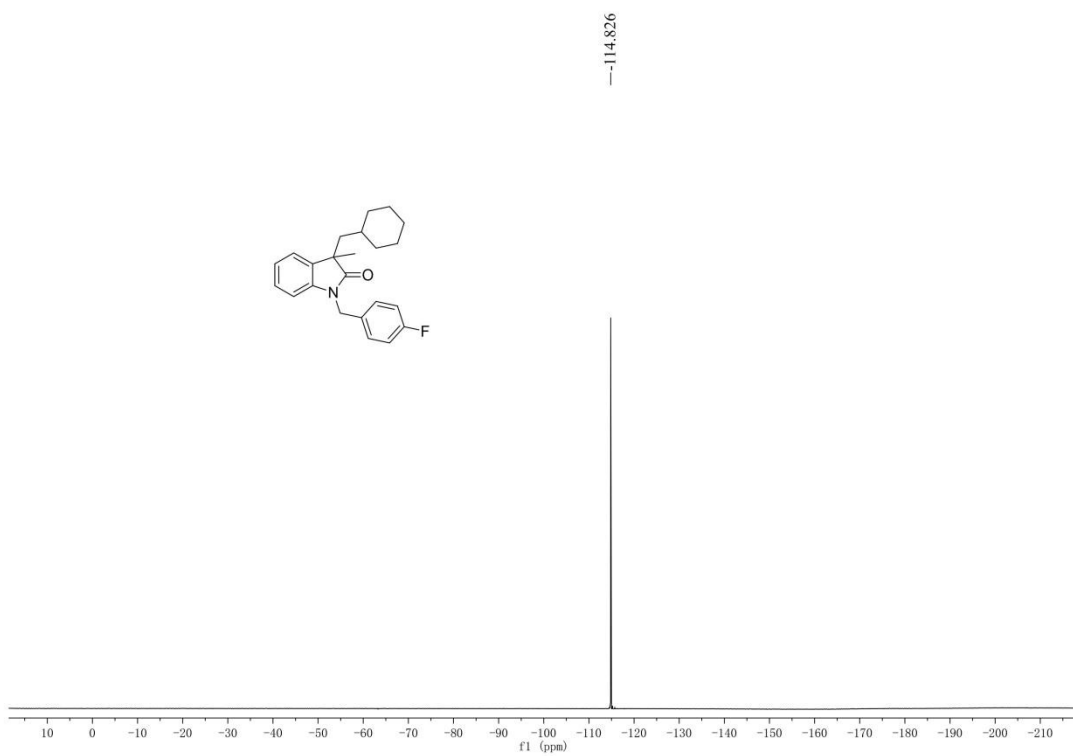

### 3-(Cyclohexylmethyl)-1-(2-iodobenzyl)-3-methylindolin-2-one (3ya)

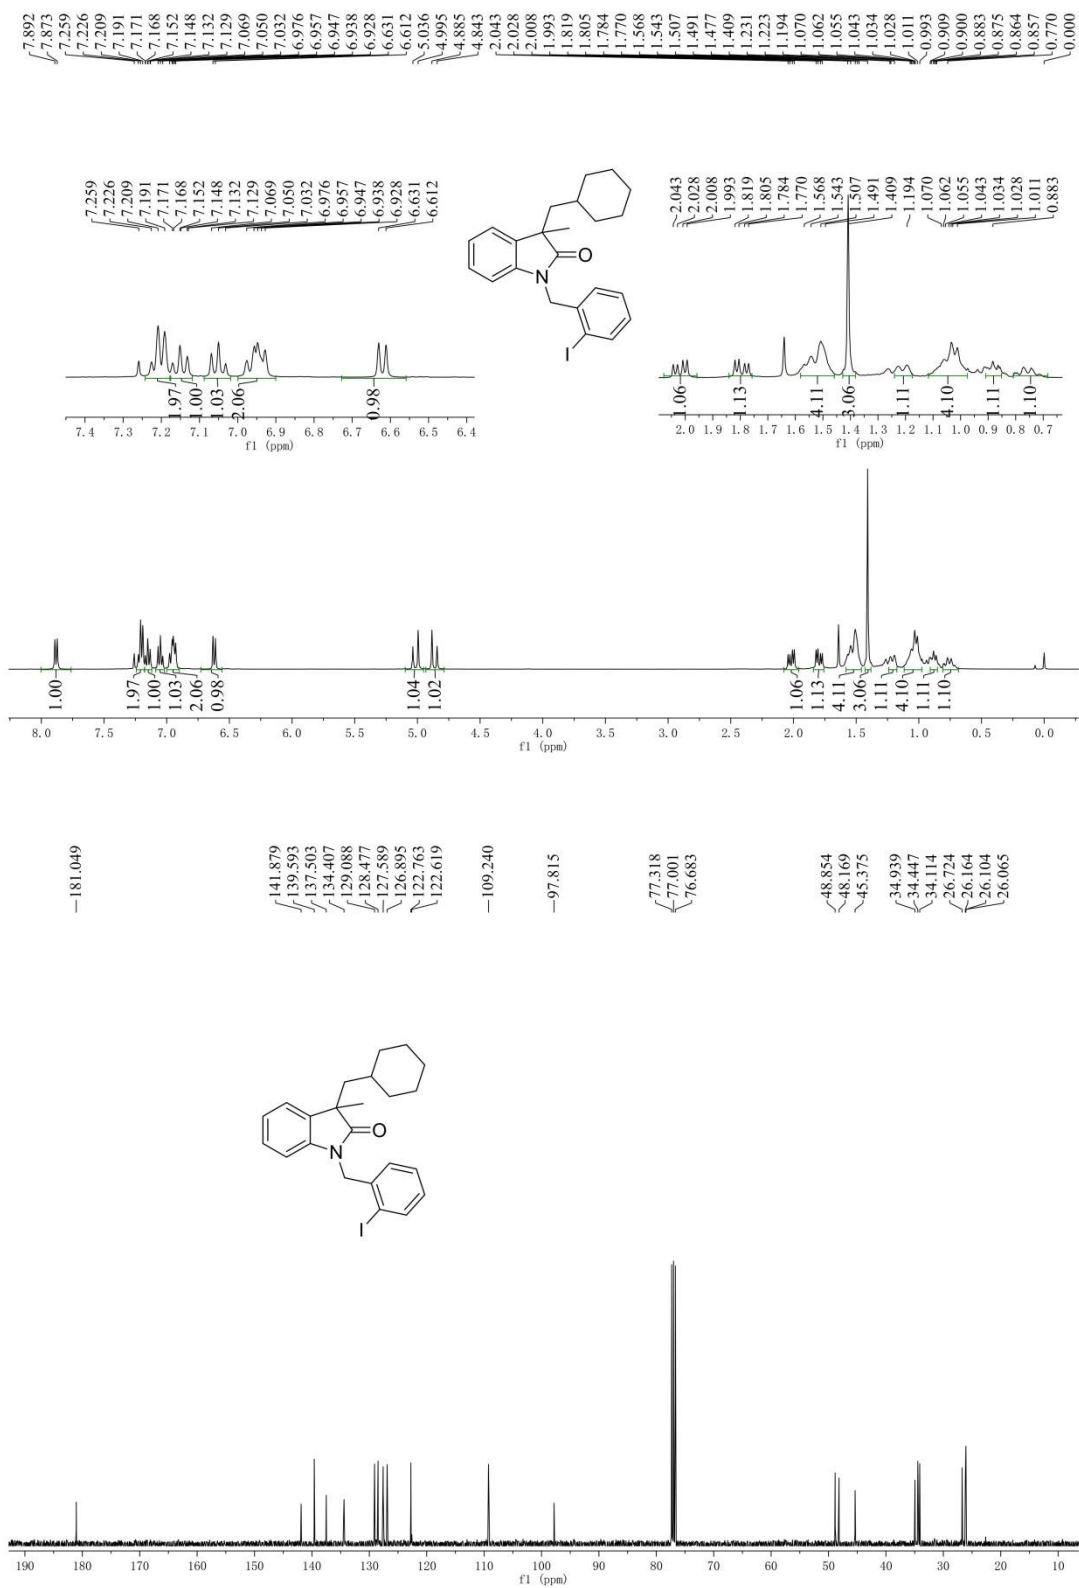

### 3-(Cyclohexylmethyl)-1-methyl-3-phenylindolin-2-one (3aaa)

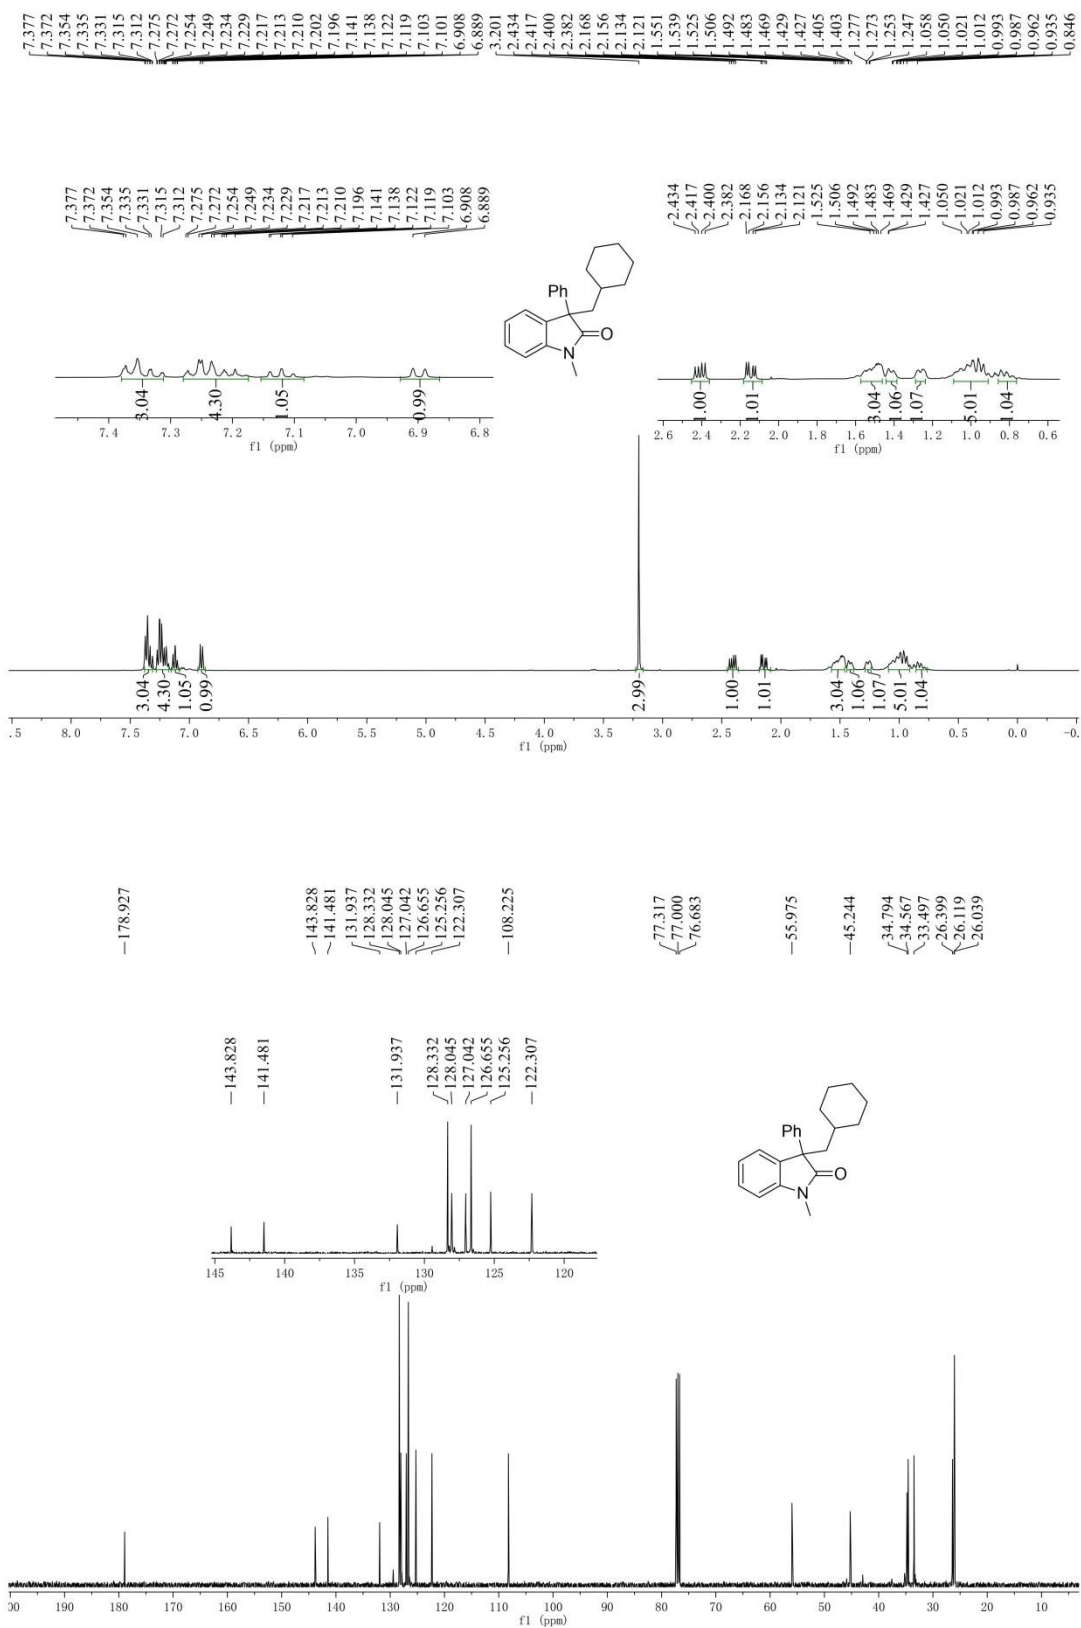



### 3-Benzyl-3-(cyclohexylmethyl)-1-methylindolin-2-one (3aba)

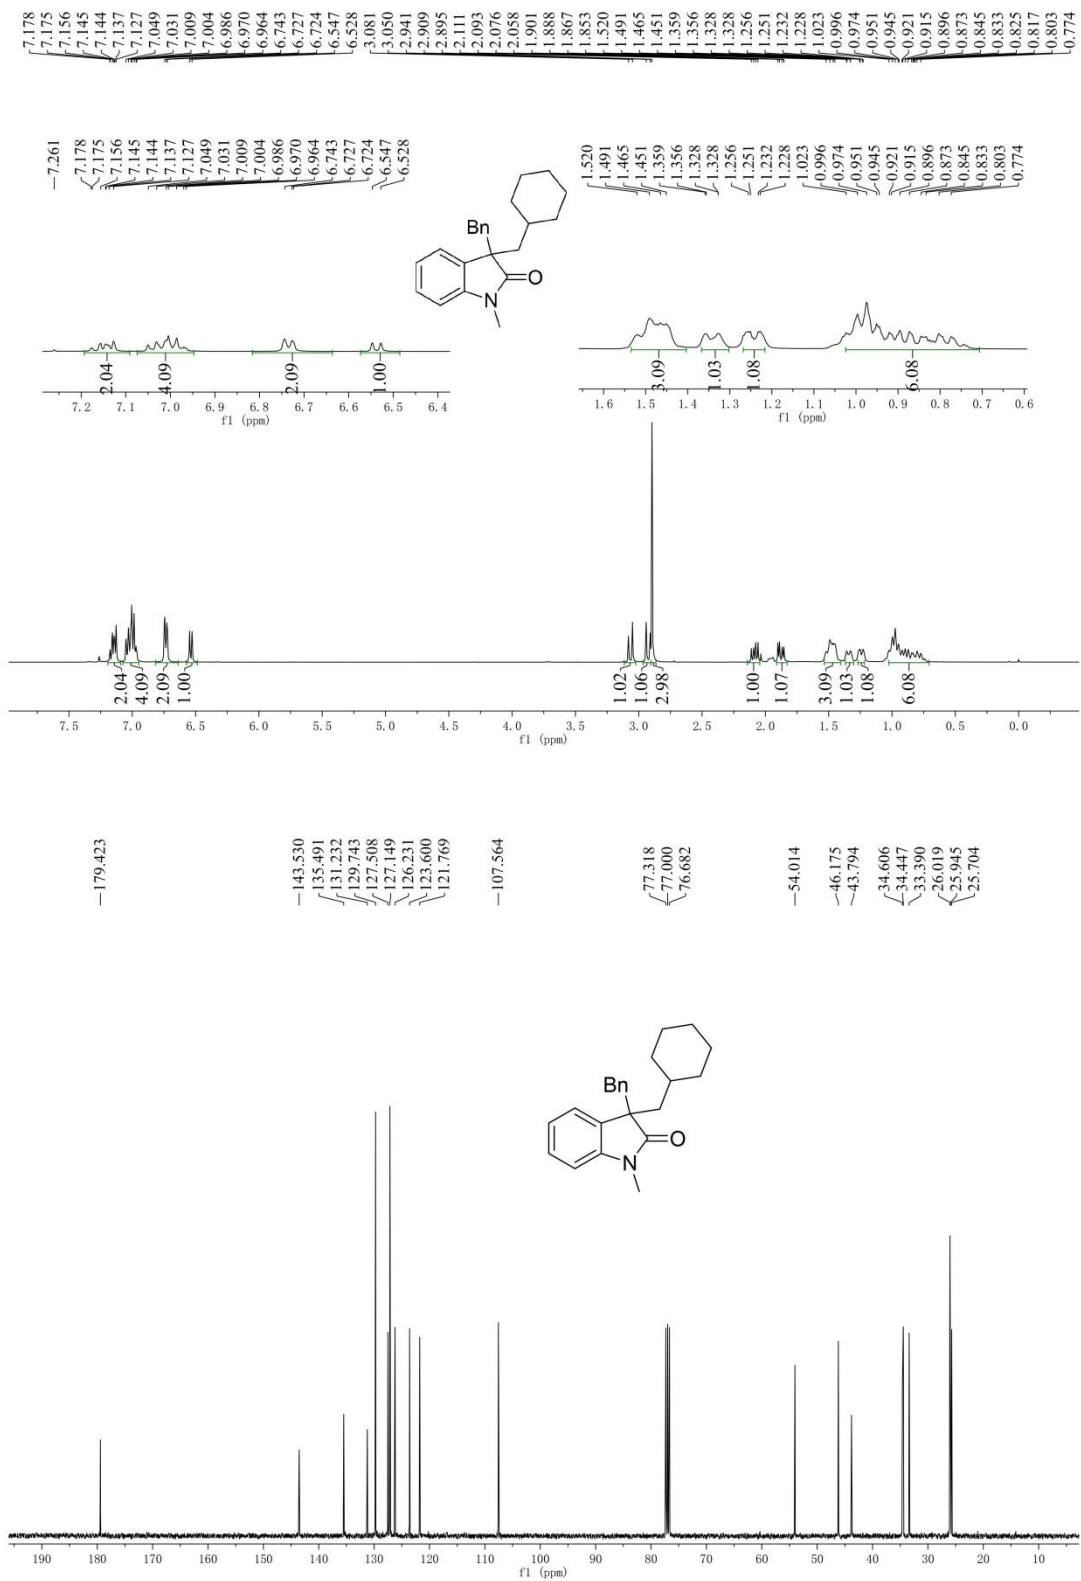

**(3-(Cyclohexylmethyl)-1-methyl-2-oxindolin-3-yl)methyl acetate (3aca)**

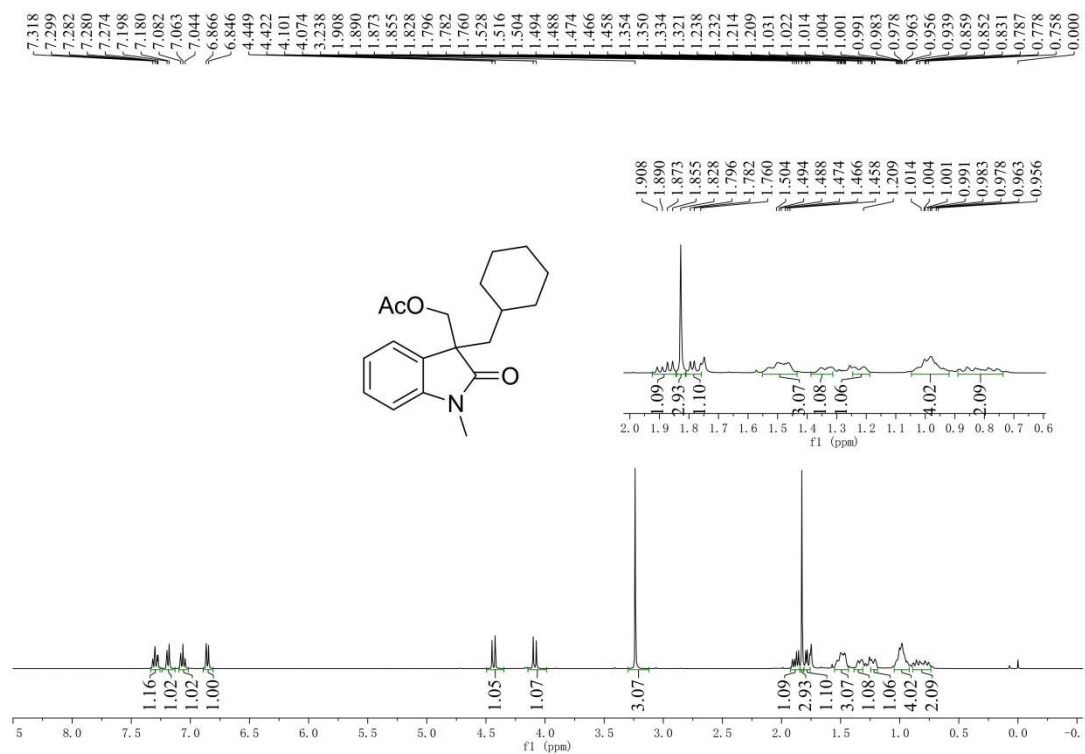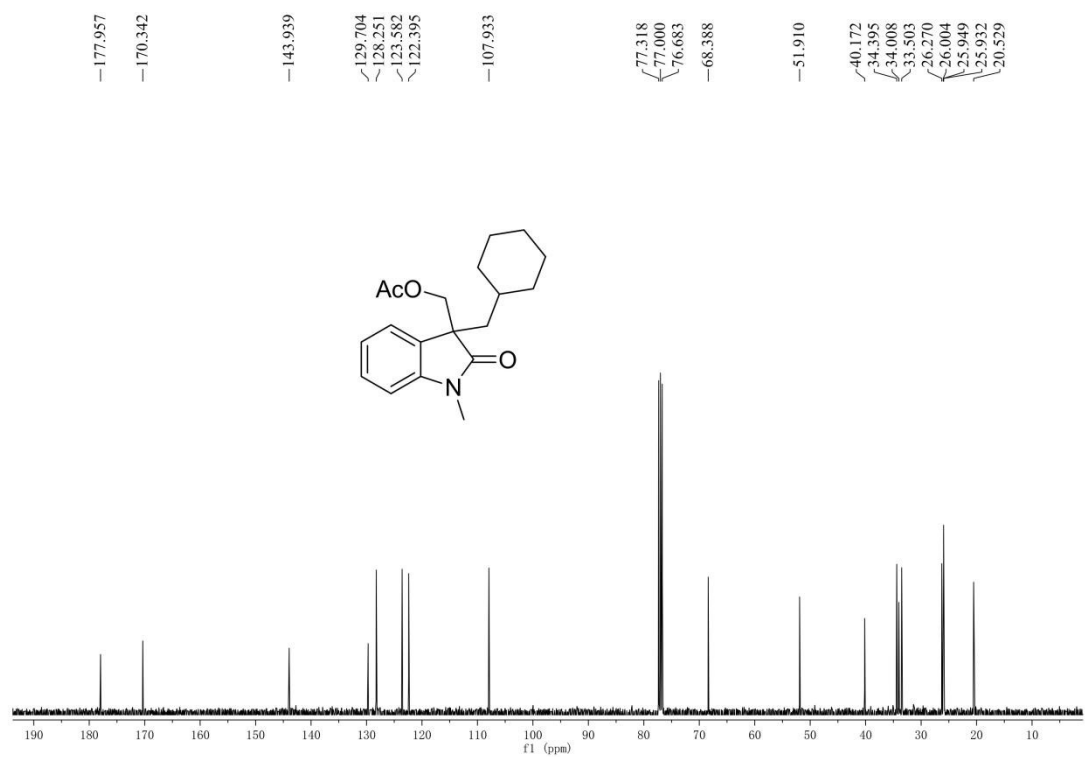

### 3-(Cyclopentylmethyl)-5-methoxy-1,3-dimethylindolin-2-one (3ab)

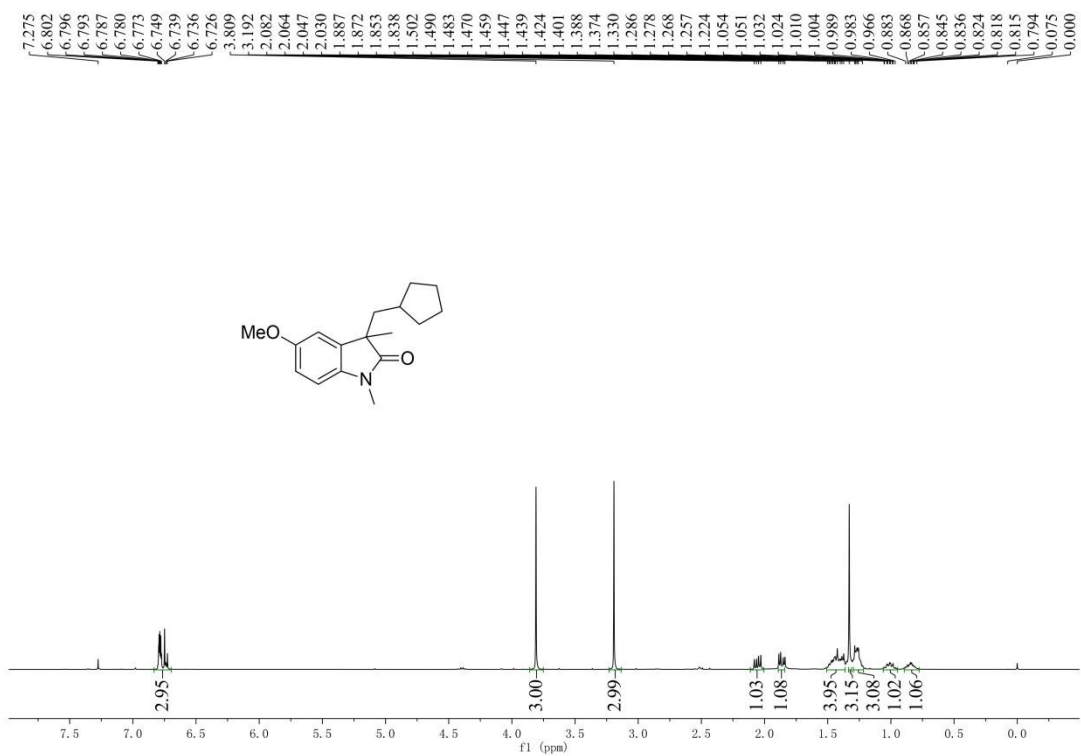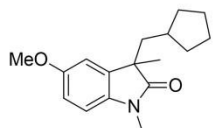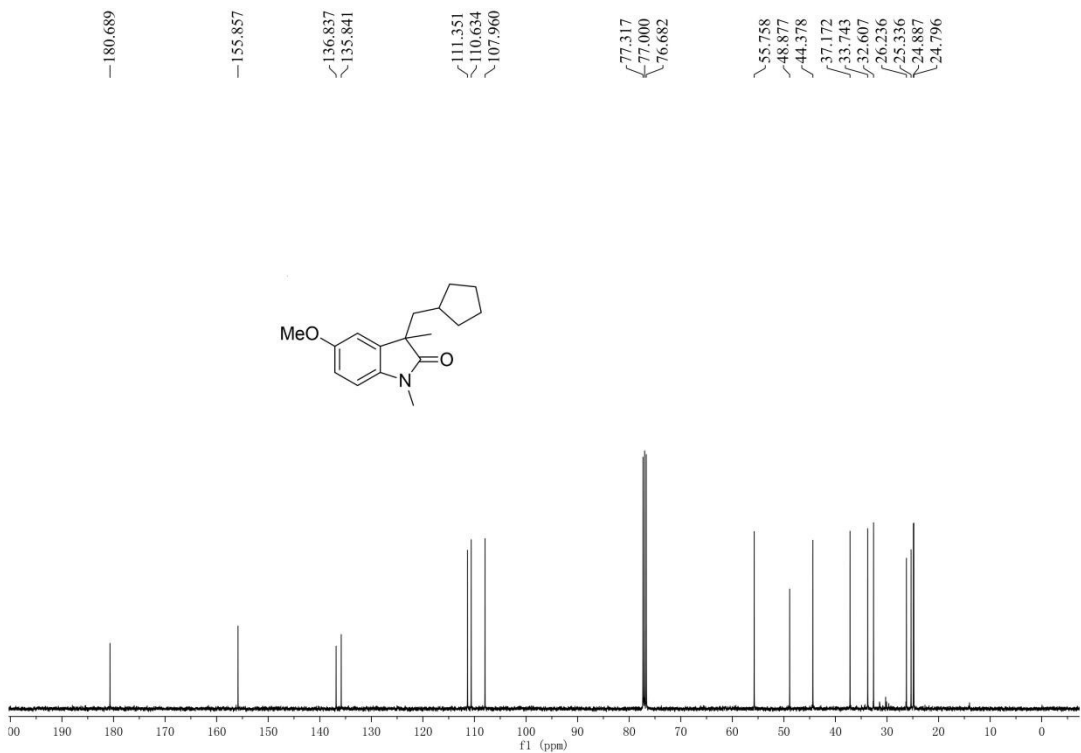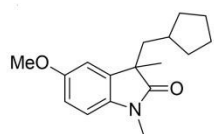

### 3-(Cyclohex-3-en-1-ylmethyl)-5-methoxy-1,3-dimethylindolin-2-one (3ac)

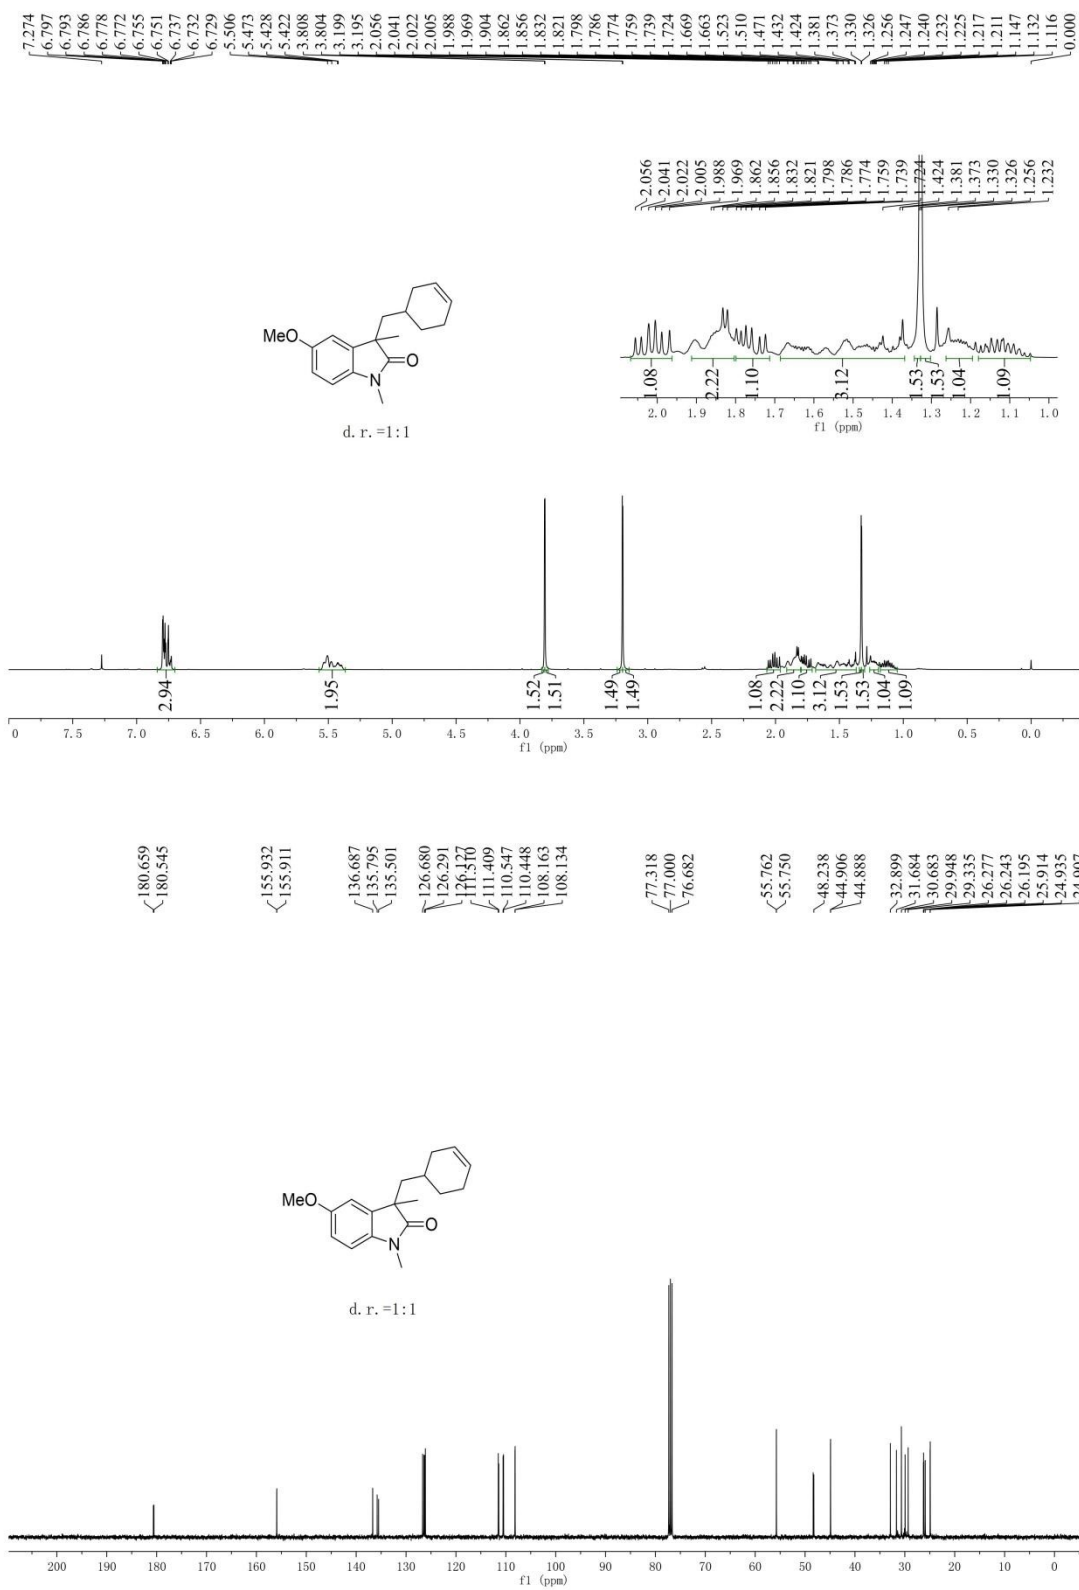

**Tert-butyl 4-((5-methoxy-1,3-dimethyl-2-oxindolin-3-yl)methyl)piperidine-1-carboxylate (3ad)**

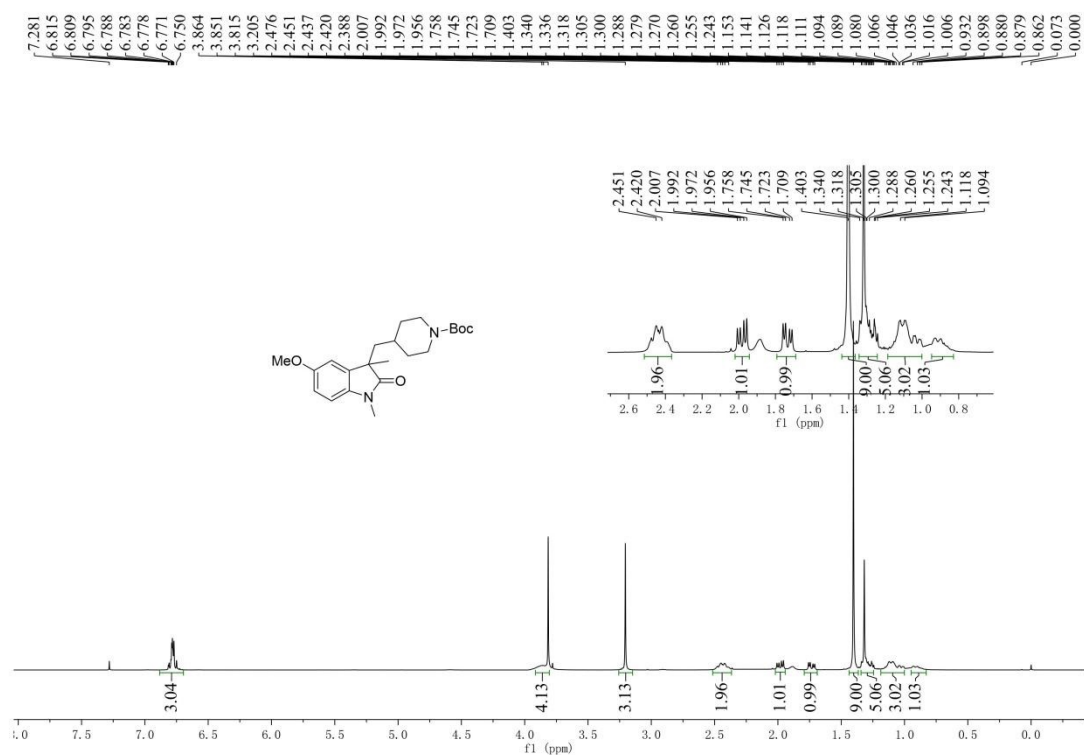

180.331

155.981  
154.600

136.474  
135.440

111.504  
110.418  
108.312

79.112  
77.318  
77.001  
76.682

55.734

48.083

44.347

33.109

32.938

32.367

28.358

26.304

26.254

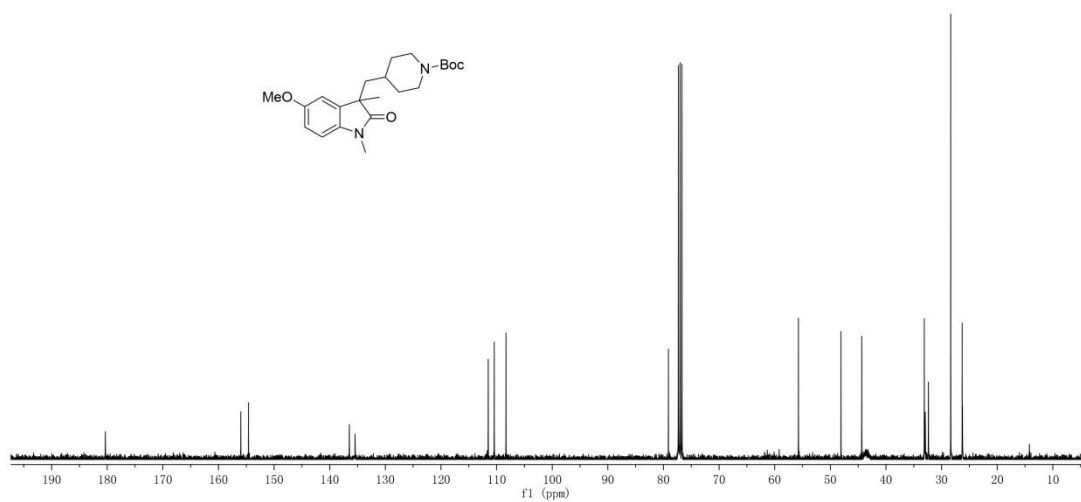

### 3-Isobutyl-5-methoxy-1,3-dimethylindolin-2-one (3ae)

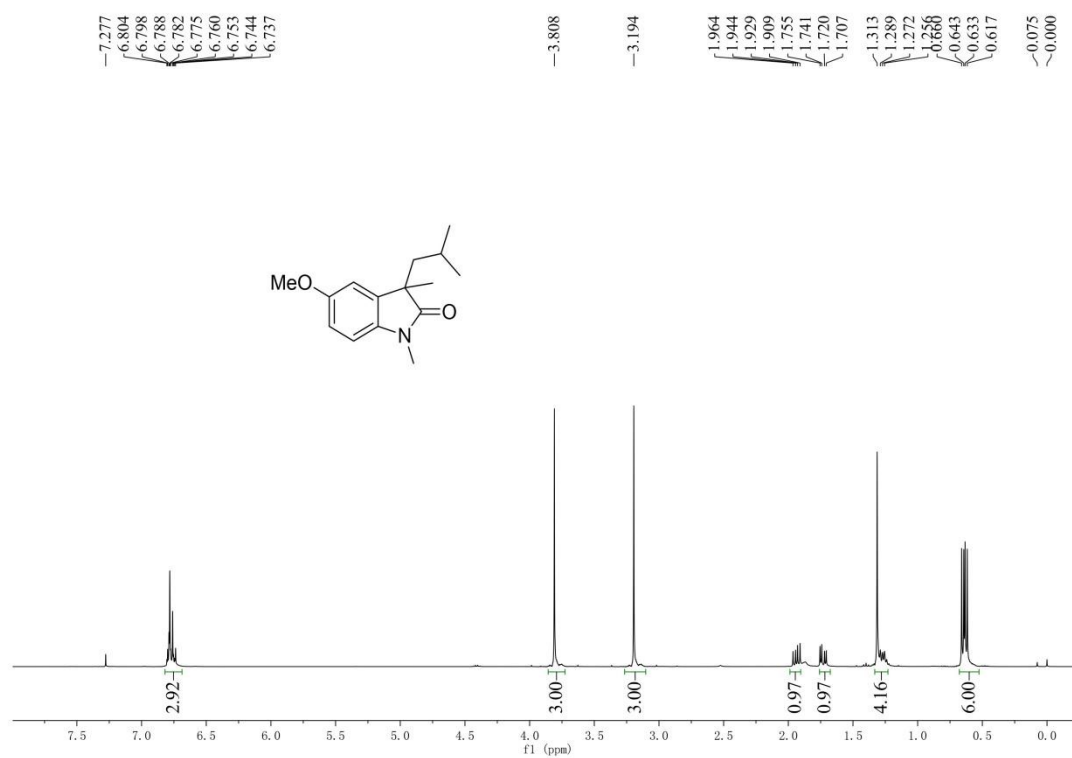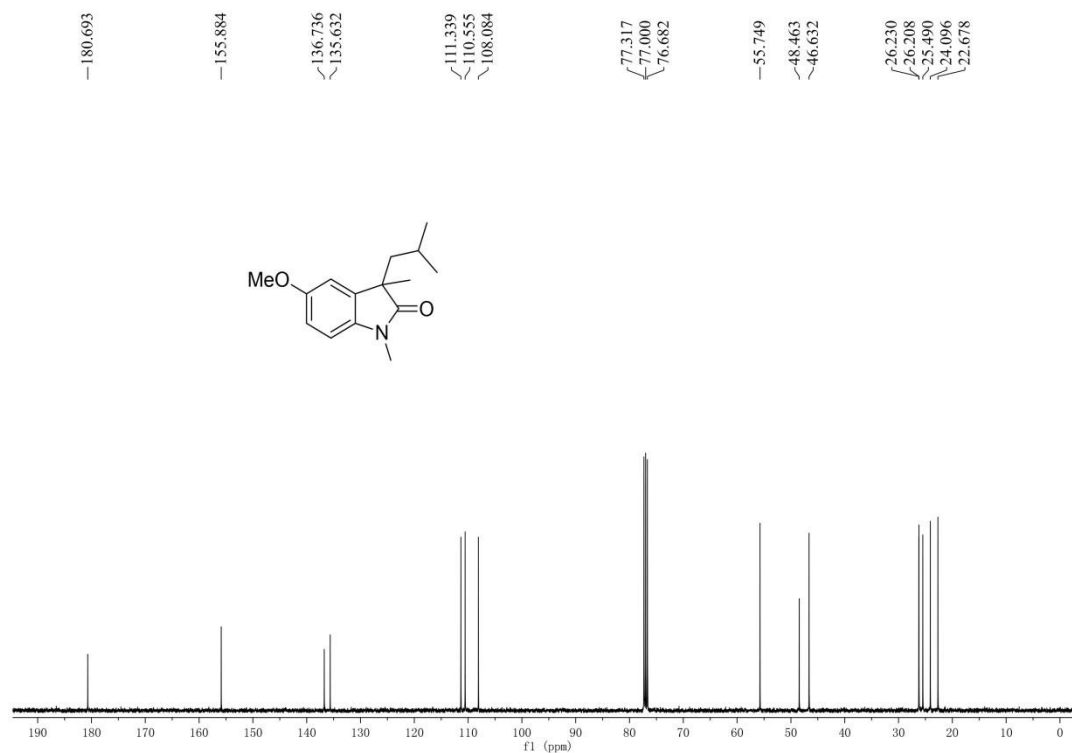

### 5-Methoxy-1,3-dimethyl-3-(2-methylbutyl)indolin-2-one (3af)

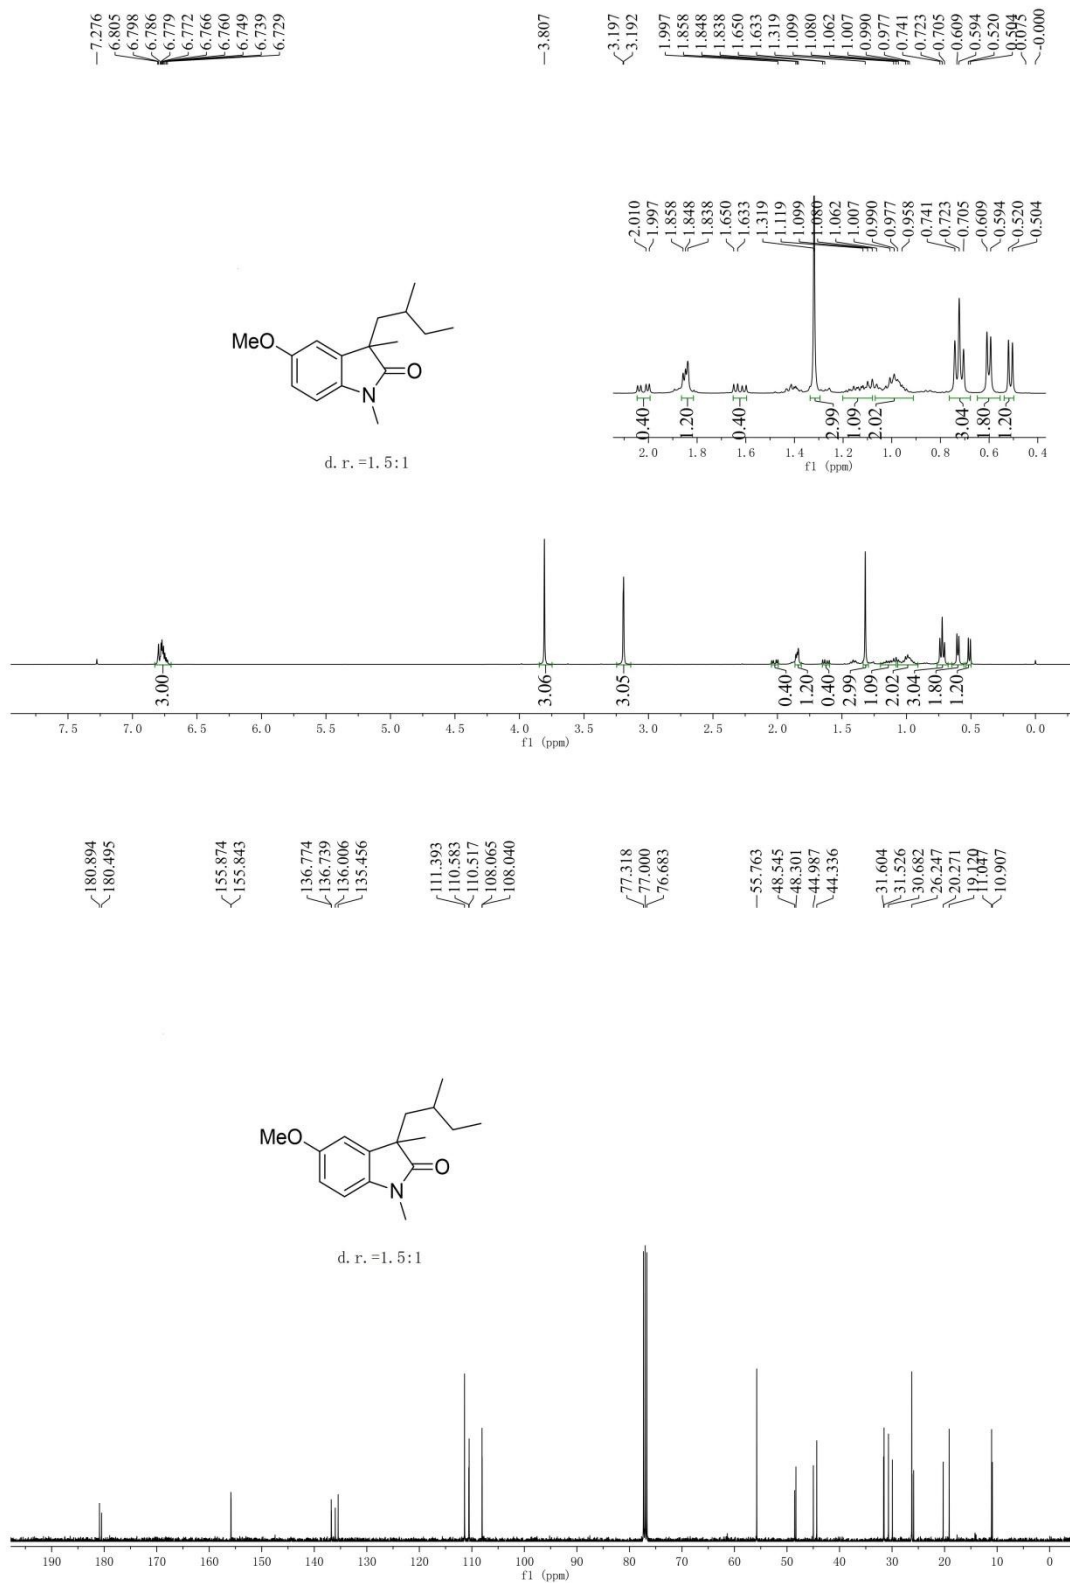

### 5-Methoxy-1,3-dimethyl-3-(2-methylpentyl)indolin-2-one (3ag)

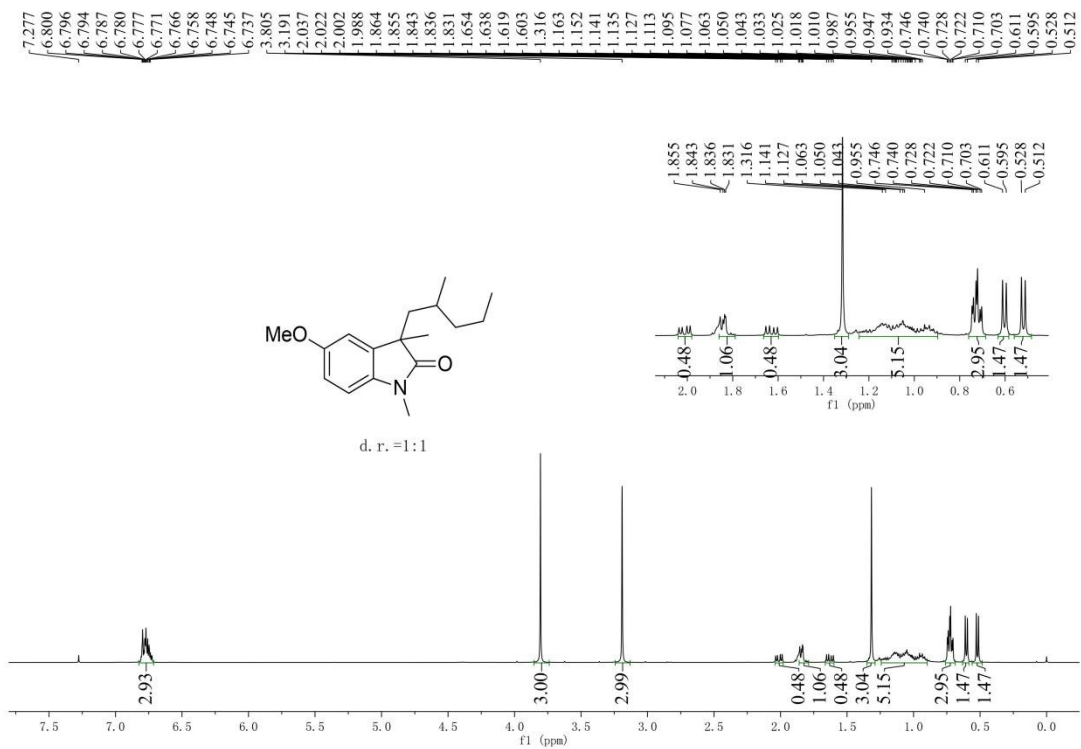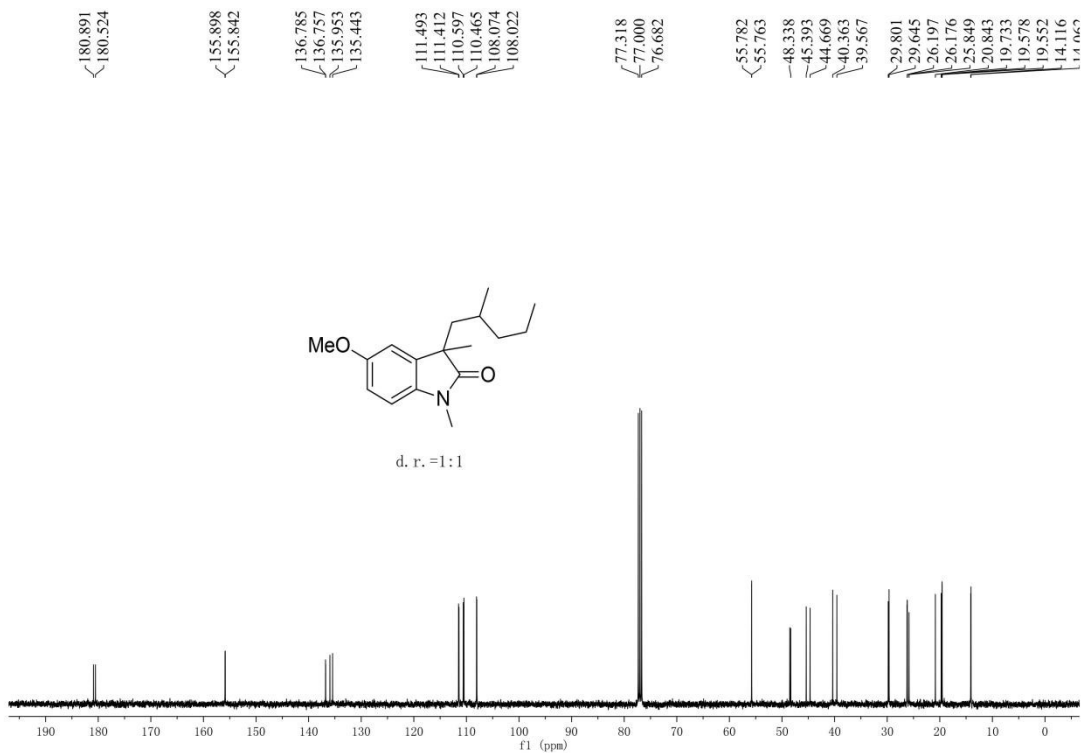



**3-(2,6-Dimethylhept-5-en-1-yl)-5-methoxy-1,3-dimethylindolin-2-one (3ah)**

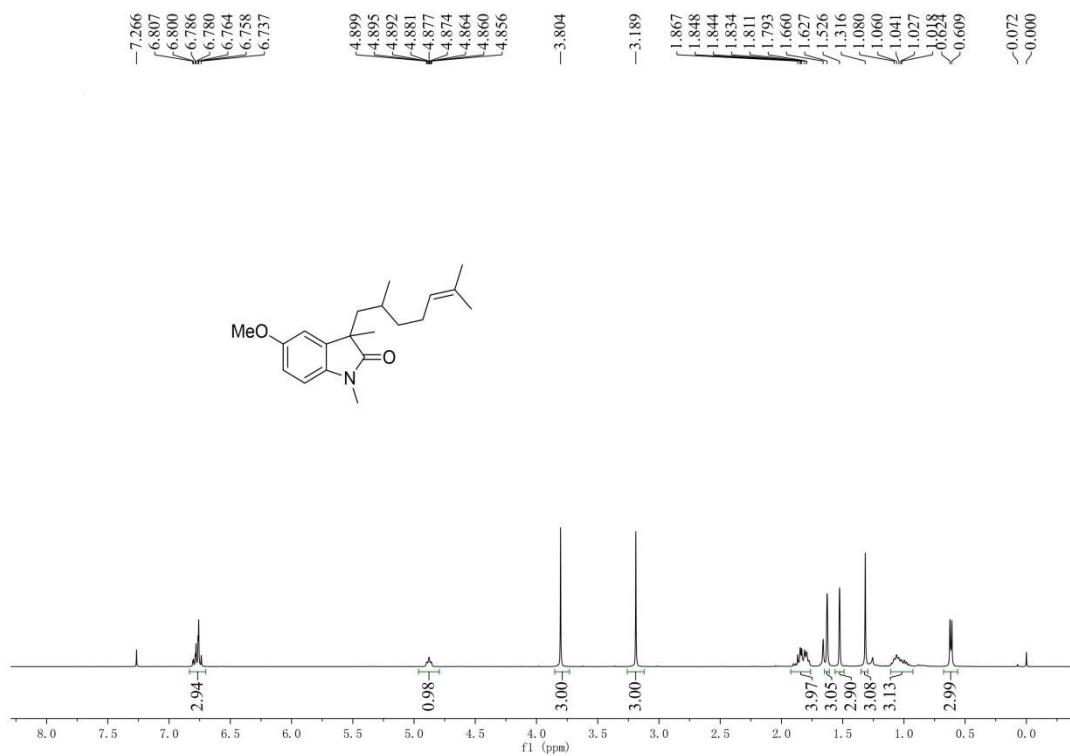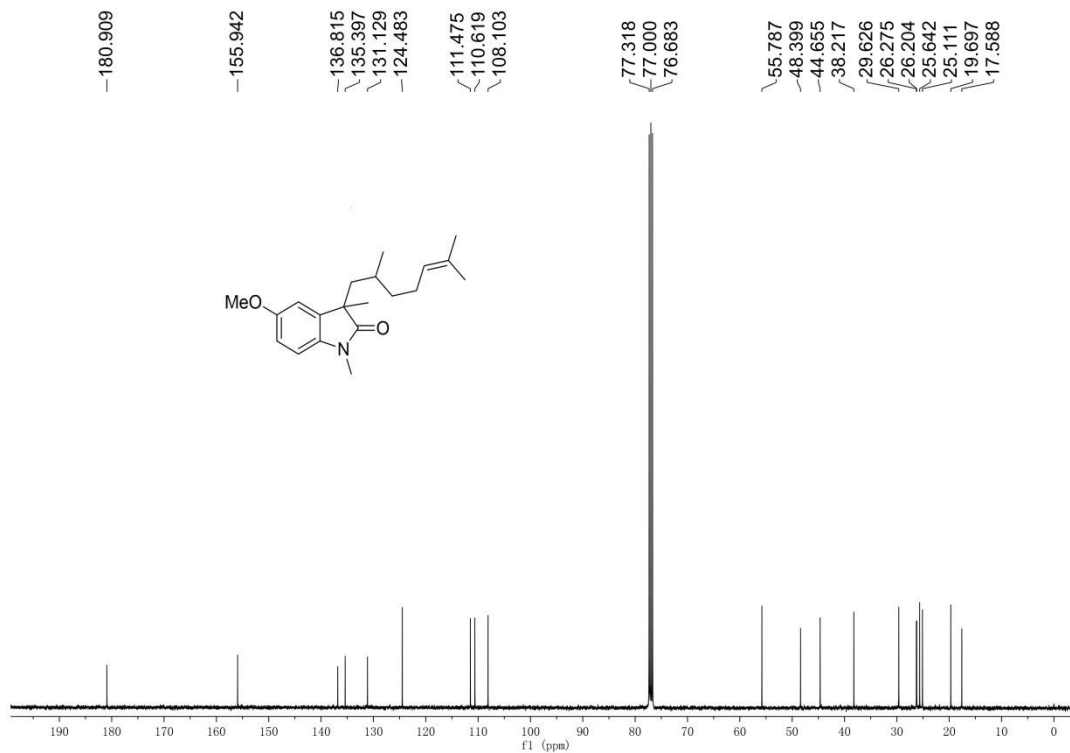

**3-(3-(Benzo[d][1,3]dioxol-5-yl)-2-methylpropyl)-5-methoxy-1,3-dimethylindolin-2-one (3ai)**

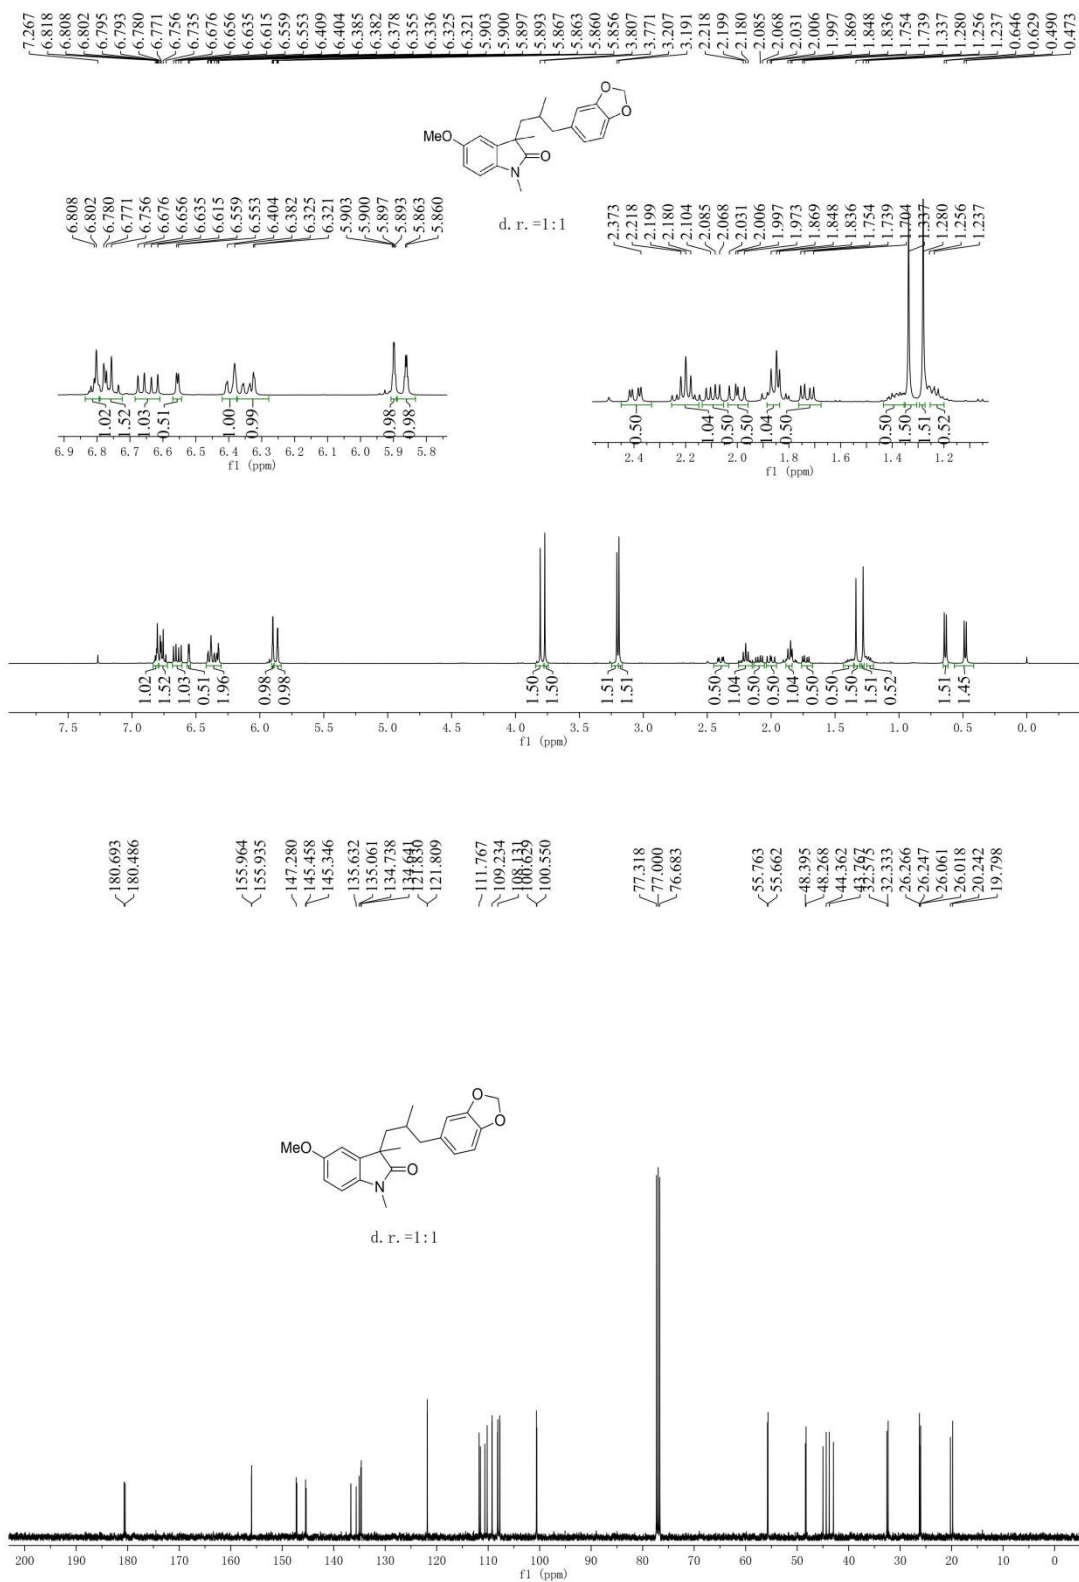

### 5-Methoxy-1,3-dimethyl-3-(2-phenylpropyl)indolin-2-one (3aj)

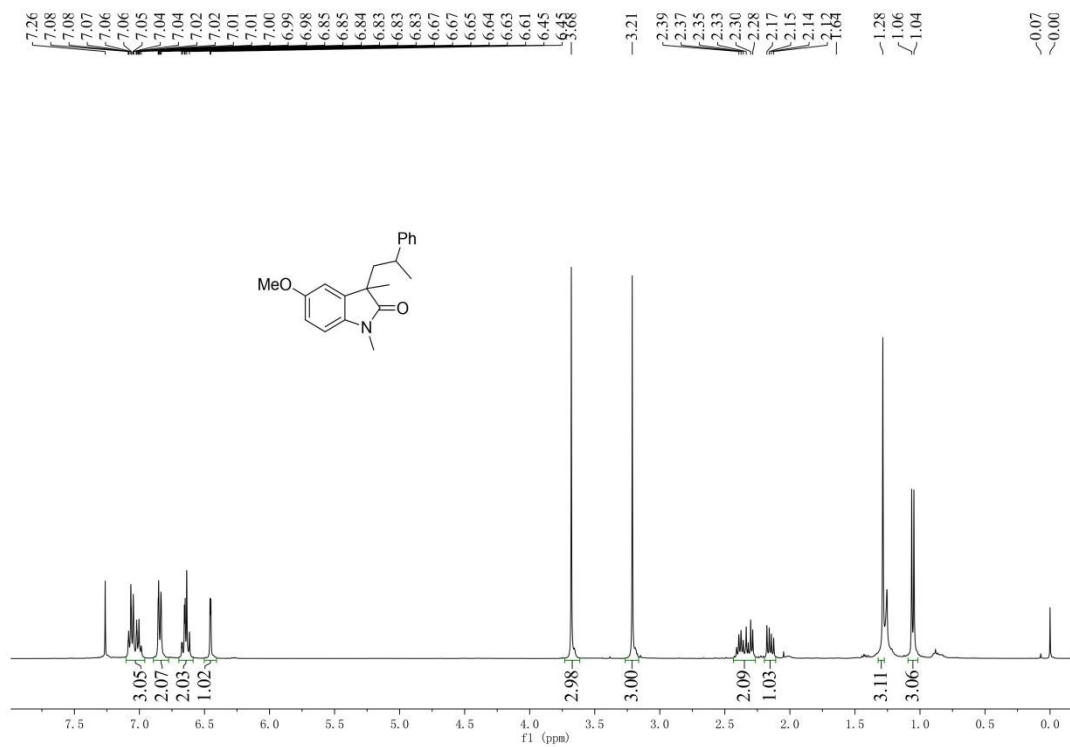

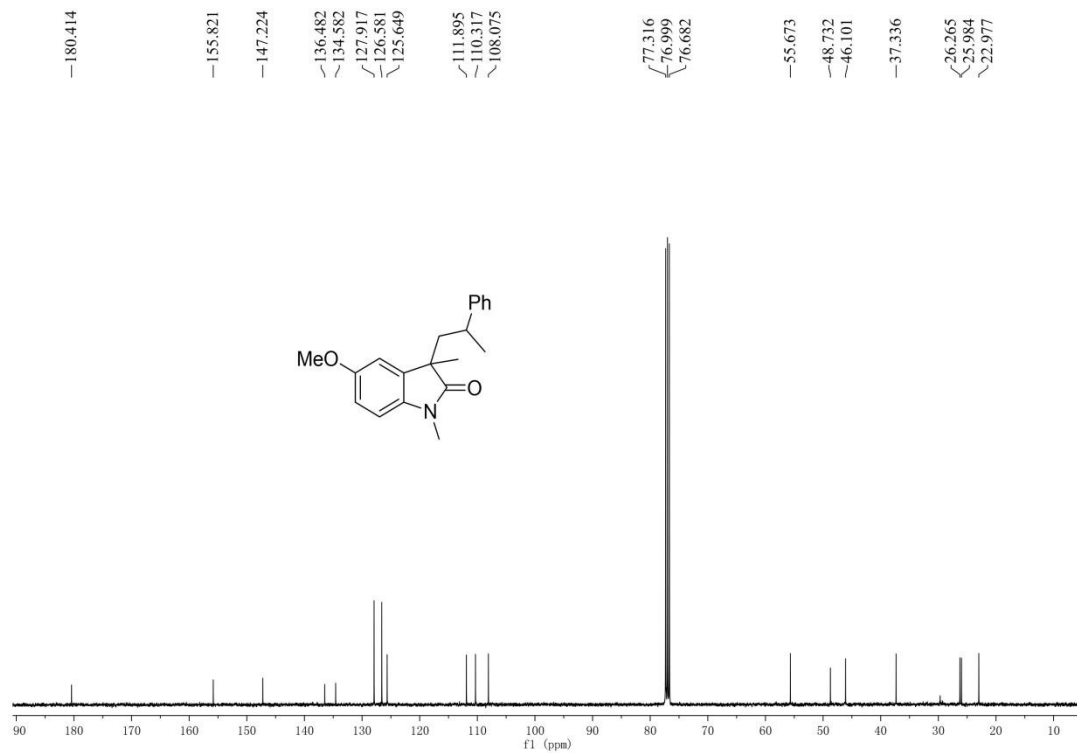

### 3-(2-Ethylhexyl)-5-methoxy-1,3-dimethylindolin-2-one (3ak)

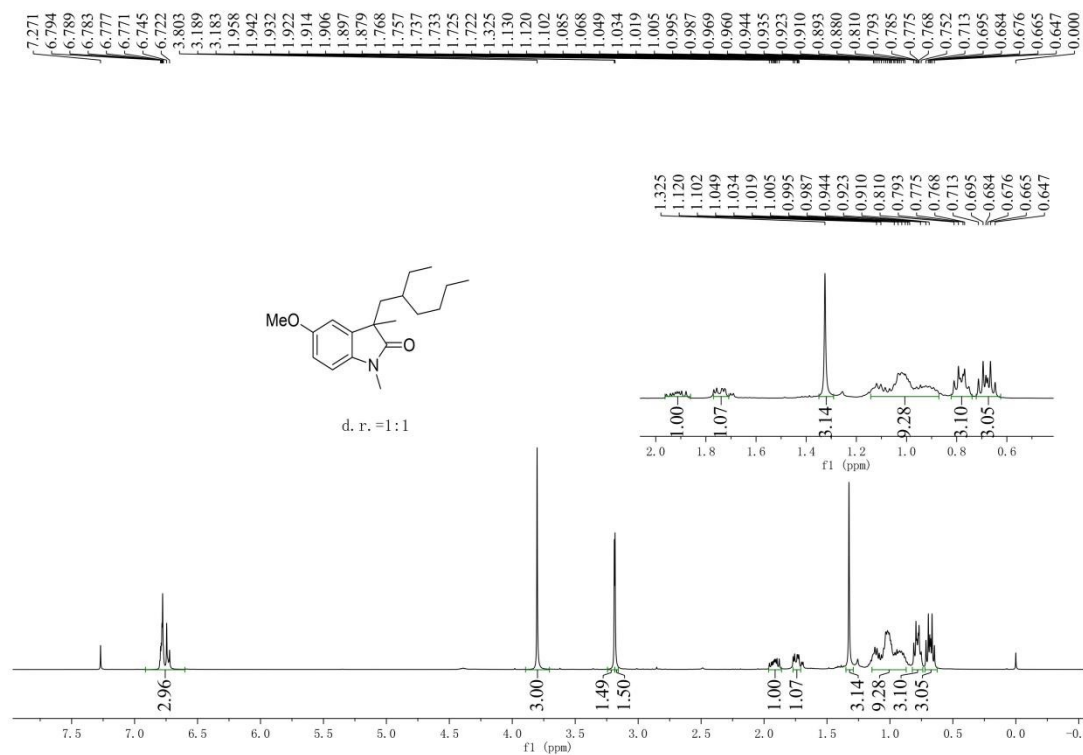

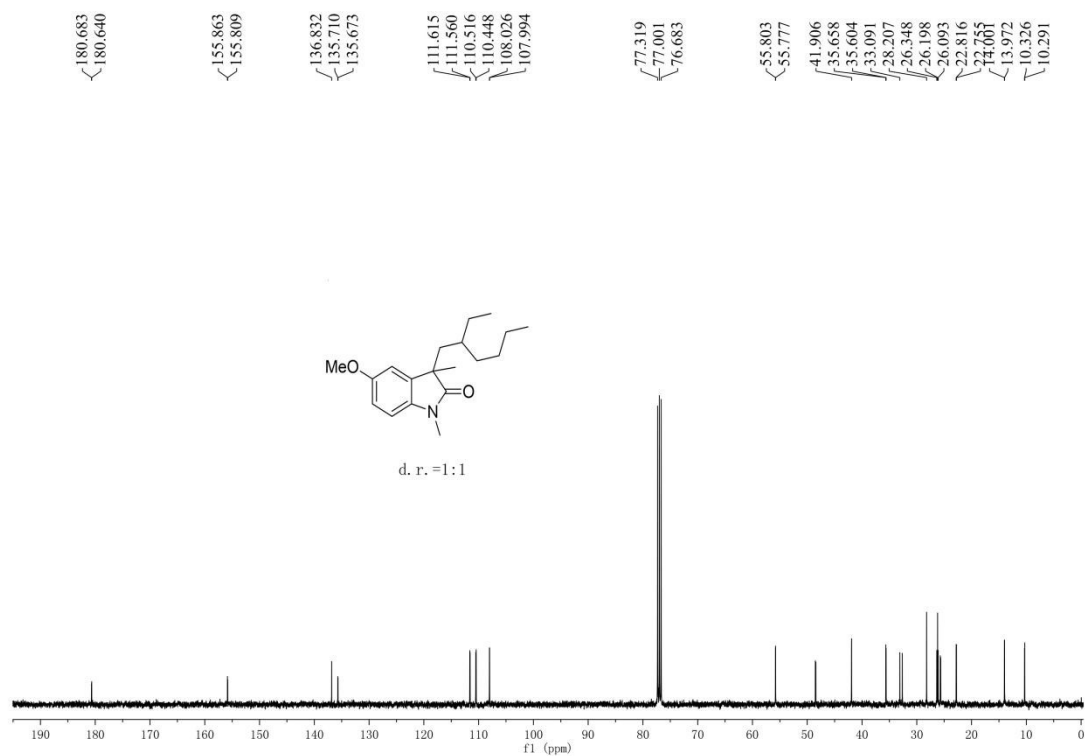

### 5-Methoxy-1,3-dimethyl-3-neopentylindolin-2-one (3a)

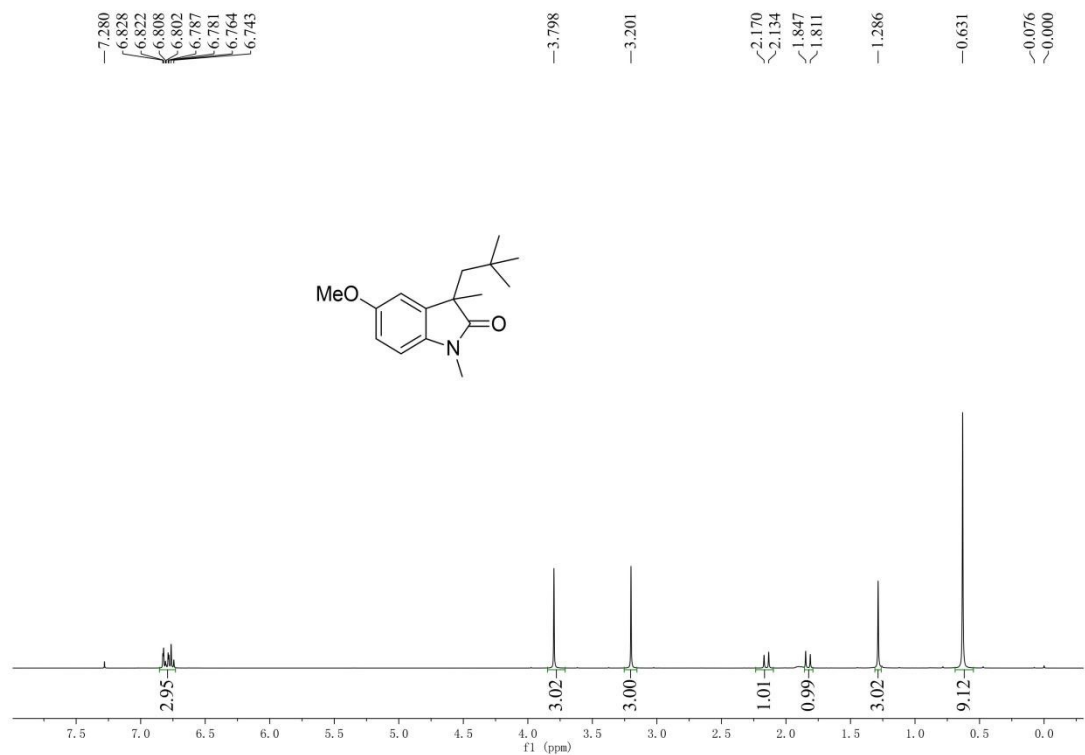

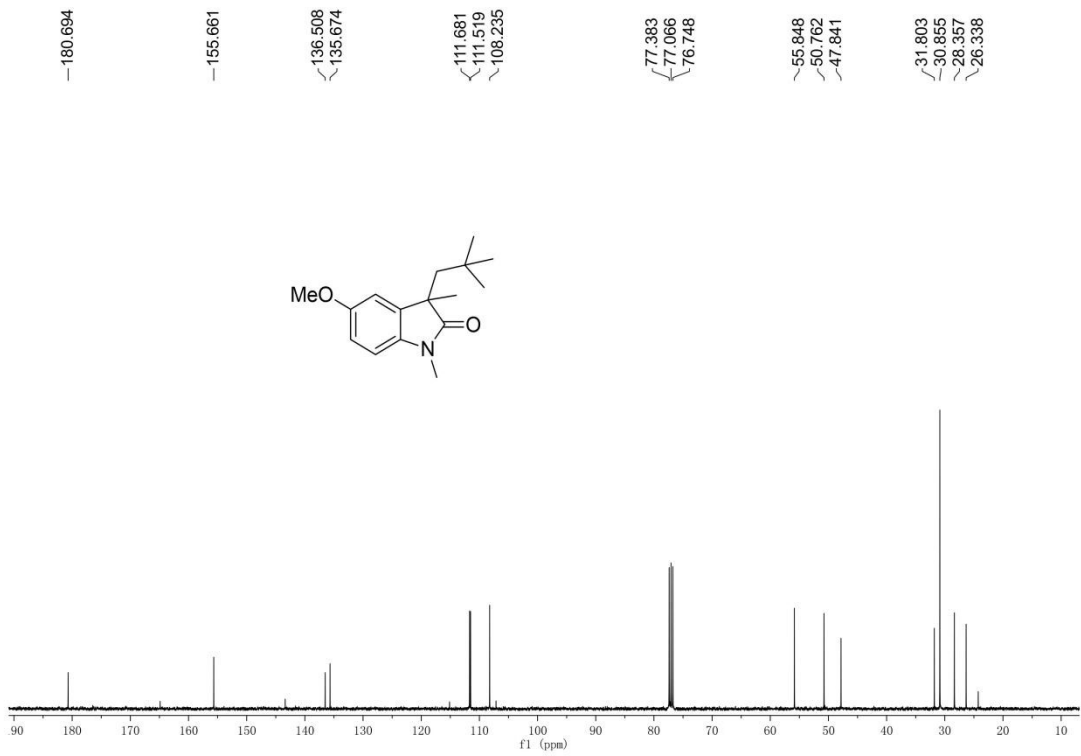

### 5-Methoxy-1,3-dimethyl-3-phenethylindolin-2-one (3am)

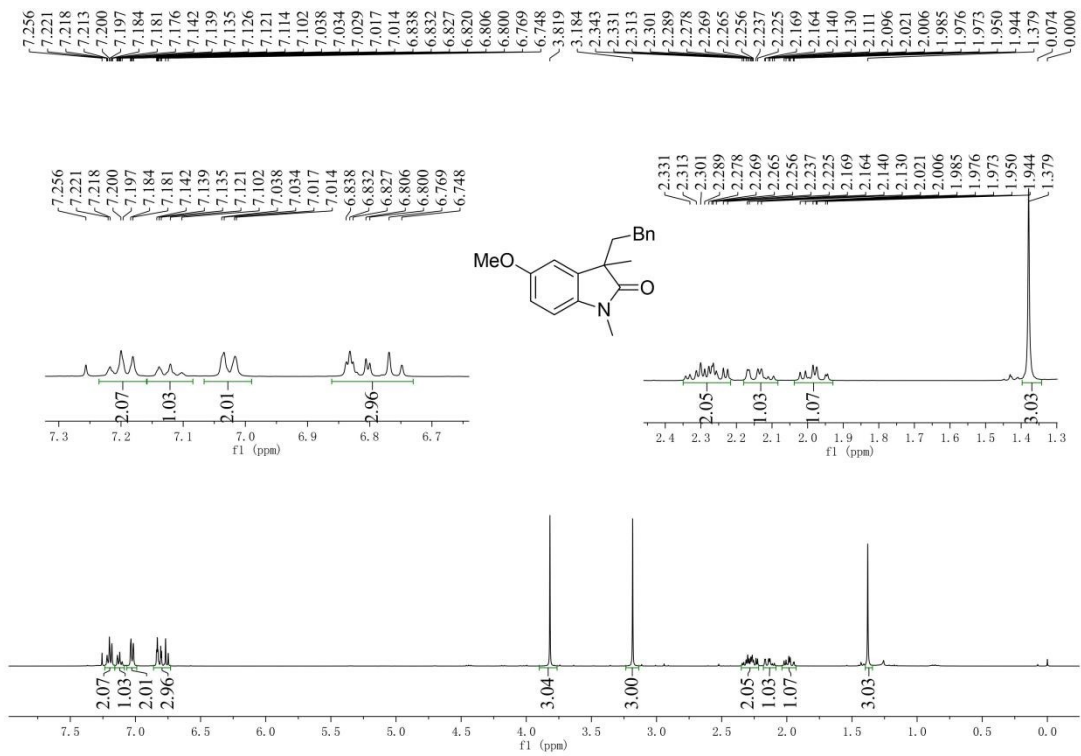

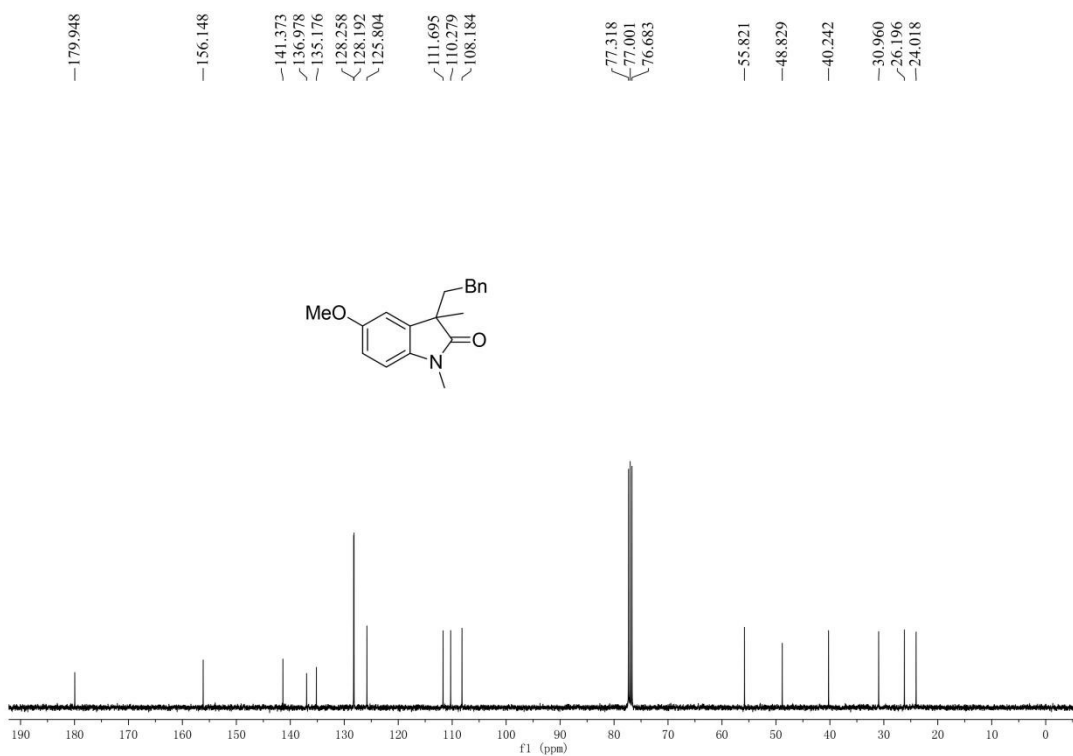

### 5-Methoxy-1,3-dimethyl-3-(3-phenylpropyl)indolin-2-one (3an)

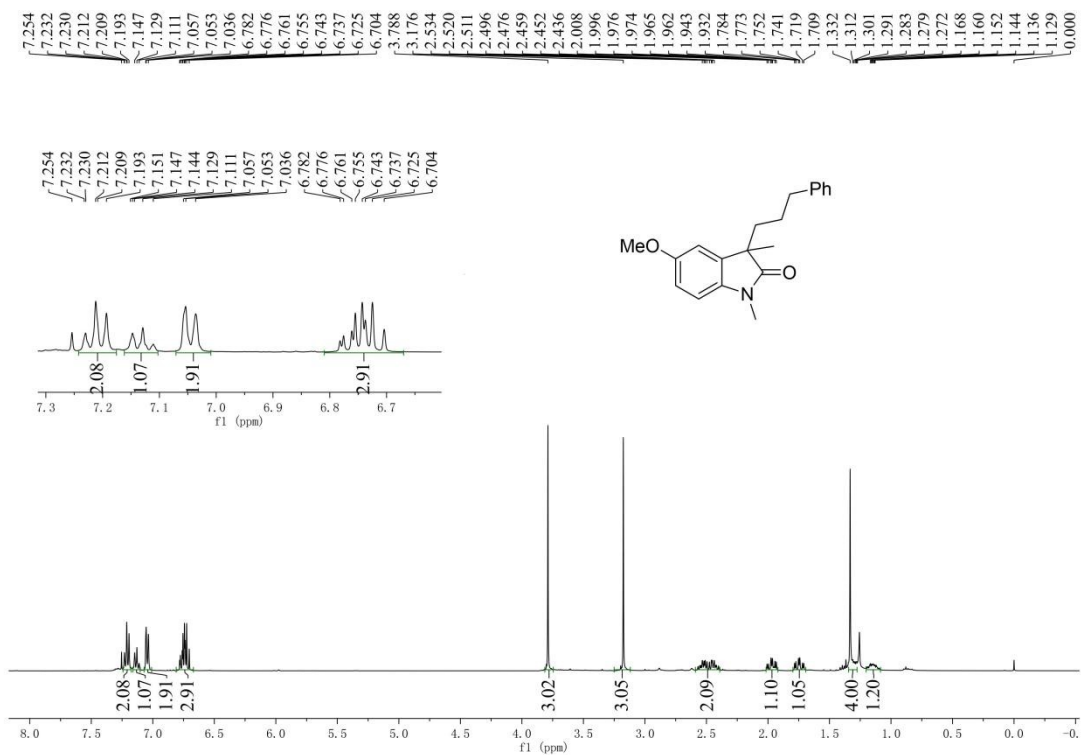

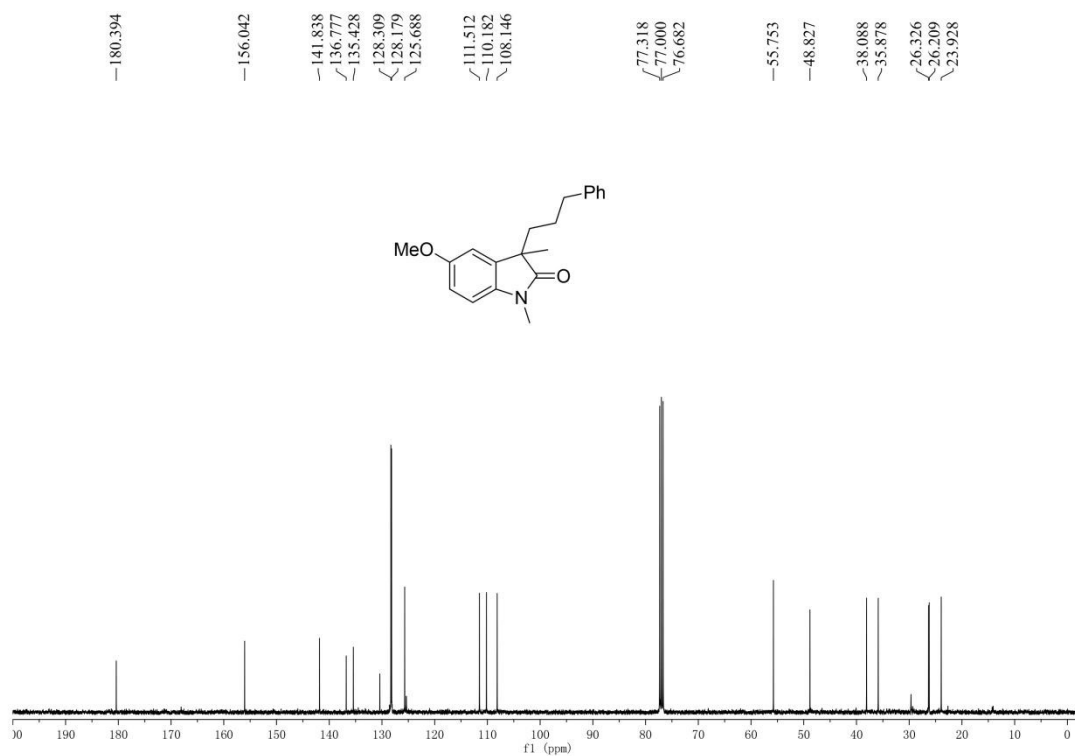

### 5-Methoxy-1,3-dimethyl-3-propylindolin-2-one (3a)

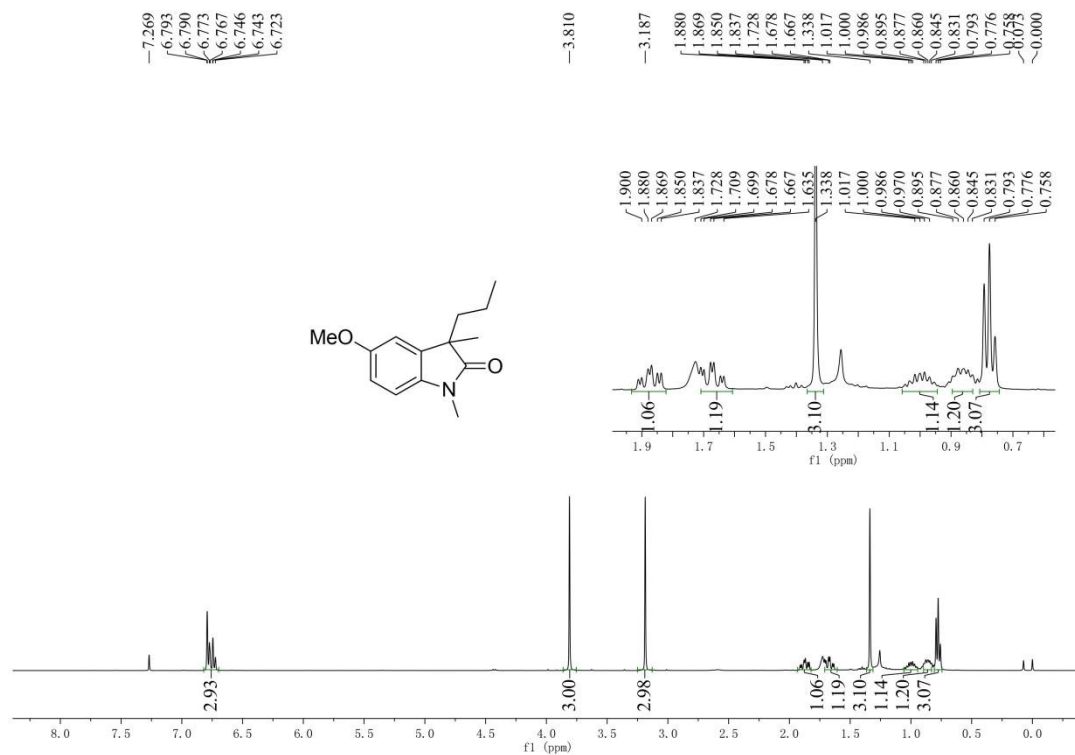



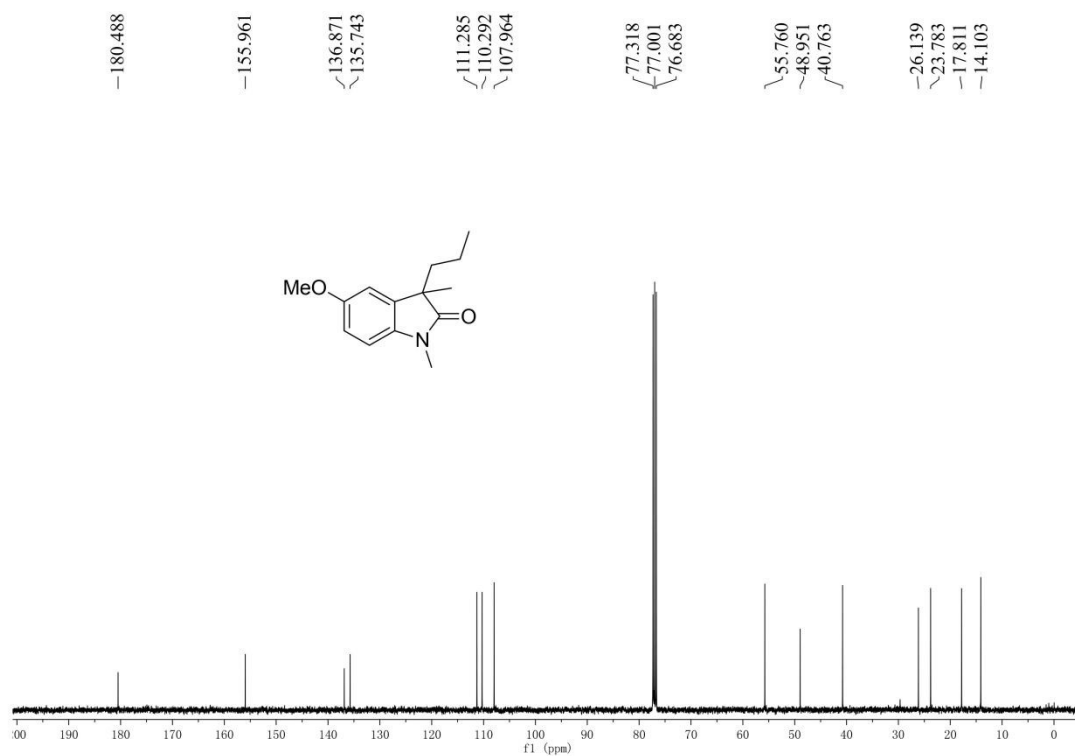

**3-Butyl-5-methoxy-1,3-dimethylindolin-2-one (3ap)**

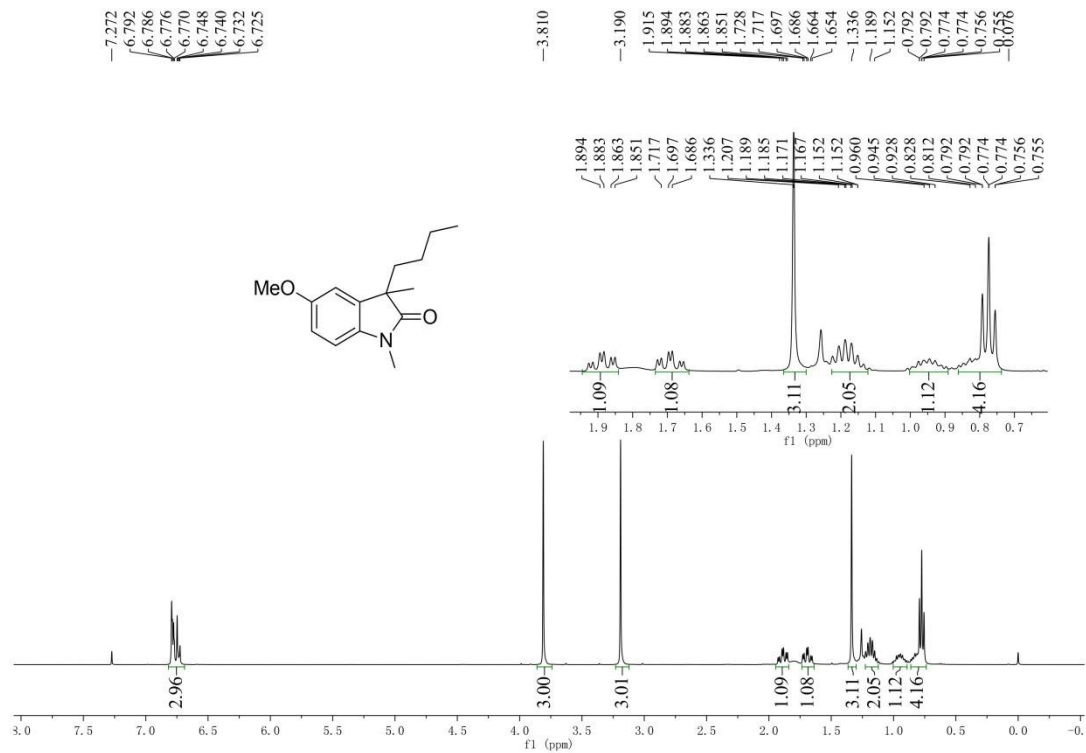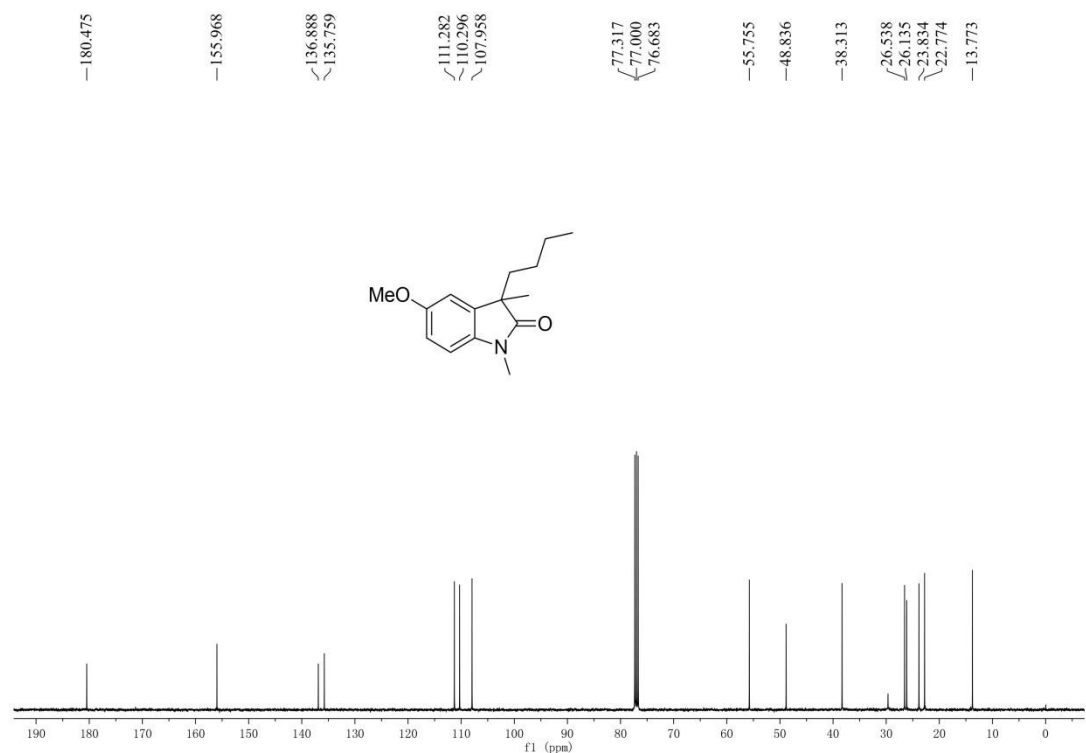

**5-Methoxy-1,3-dimethyl-3-pentylindolin-2-one (3aq)**

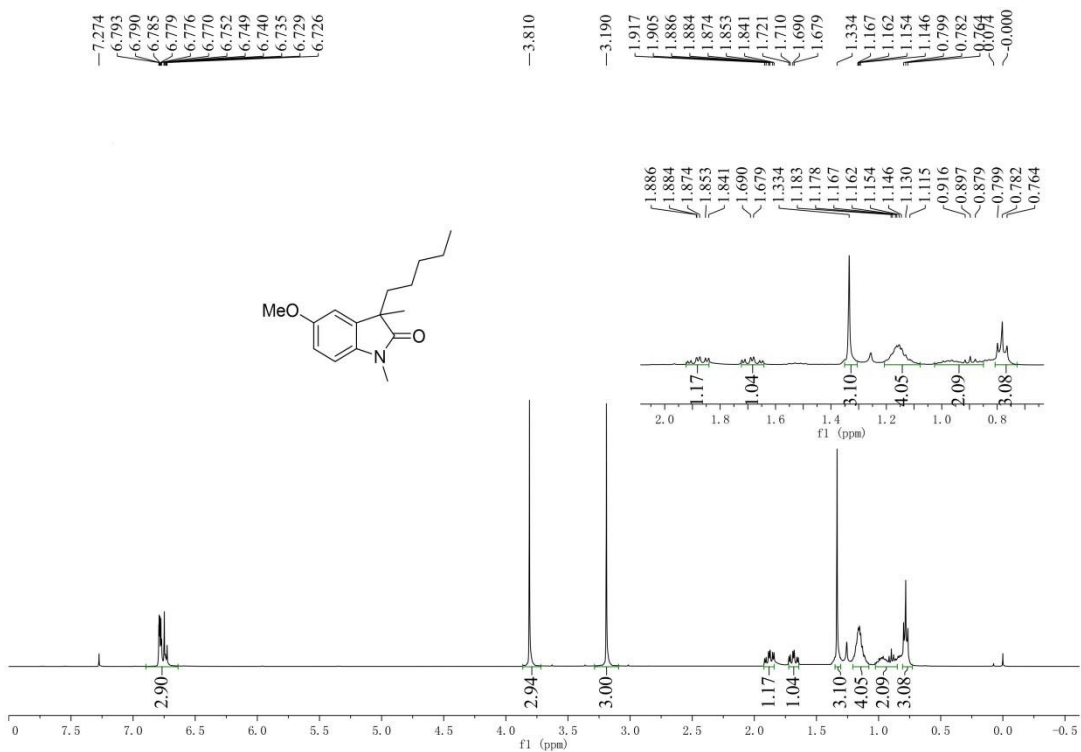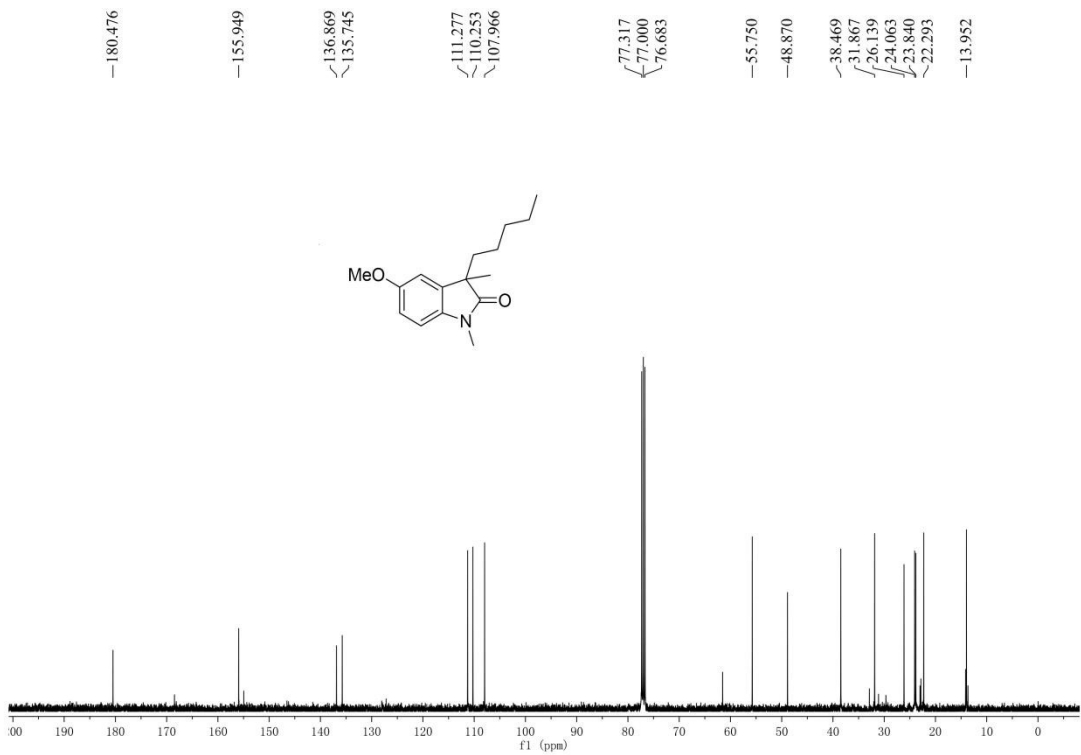

### 3-Hexyl-5-methoxy-1,3-dimethylindolin-2-one (3ar)

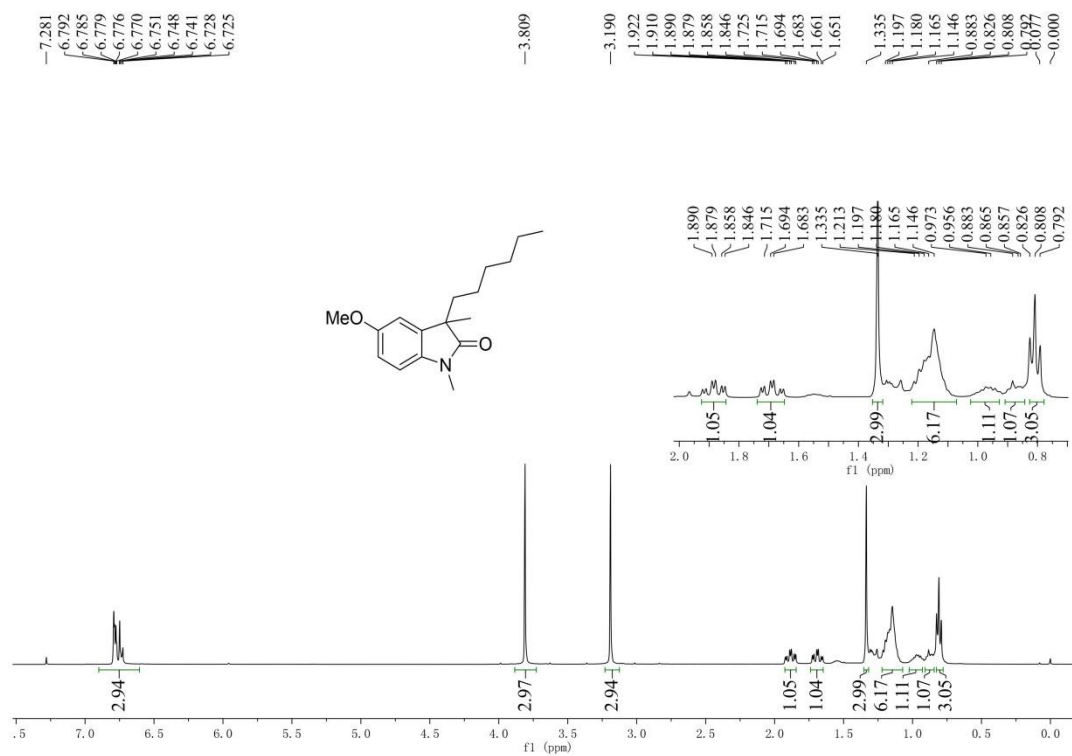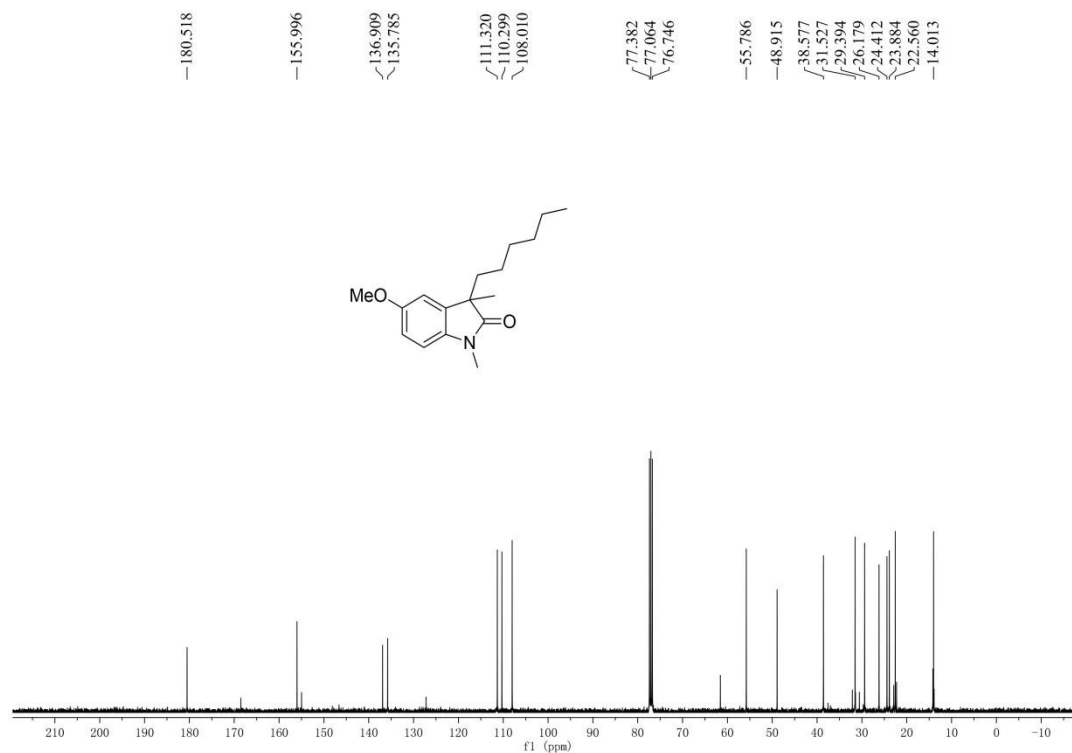

### 3-Heptyl-5-methoxy-1,3-dimethylindolin-2-one (3as)

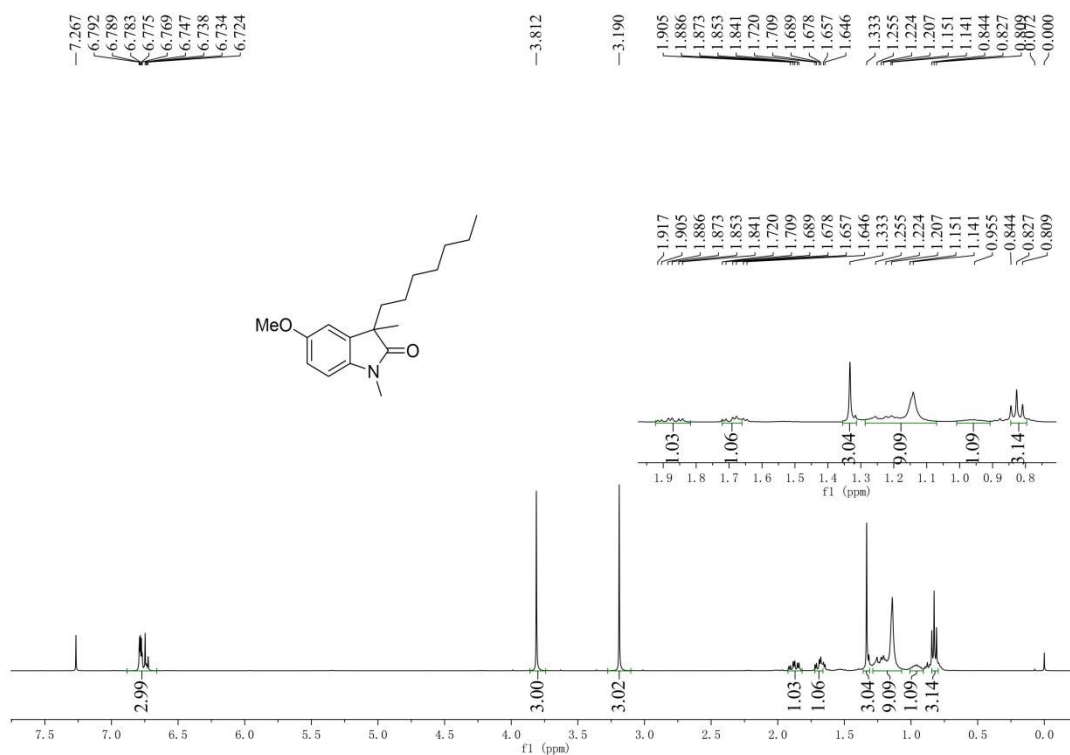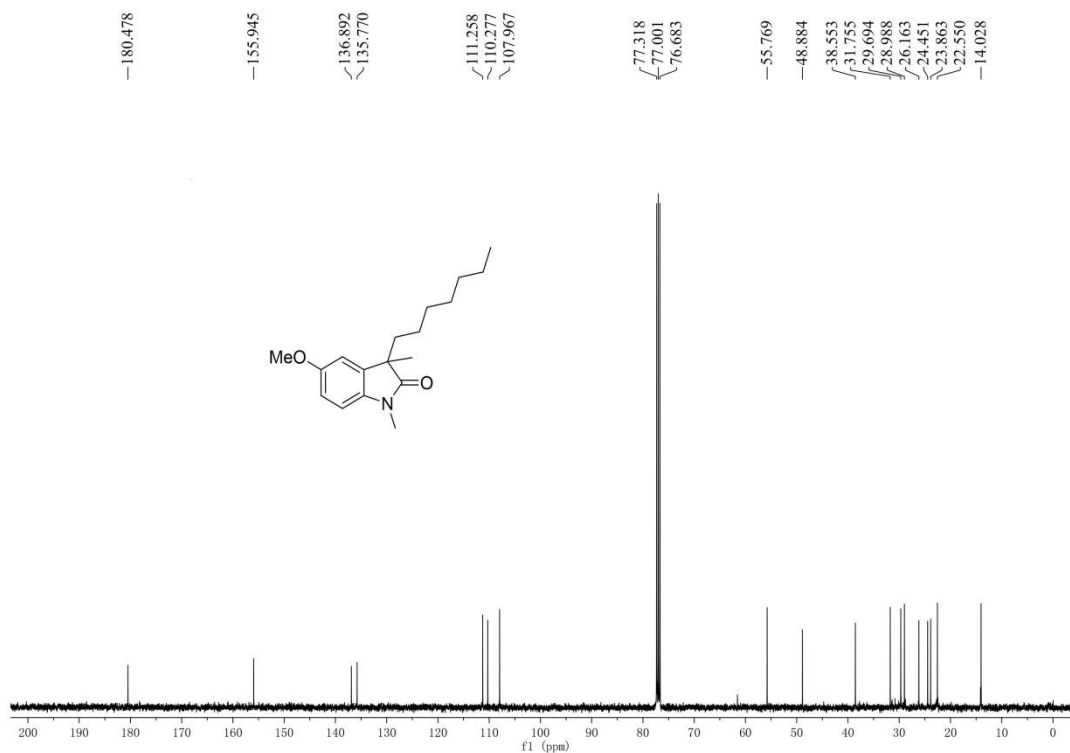

### Prop-1-ene-1,1,3-triyltribenzene (6)

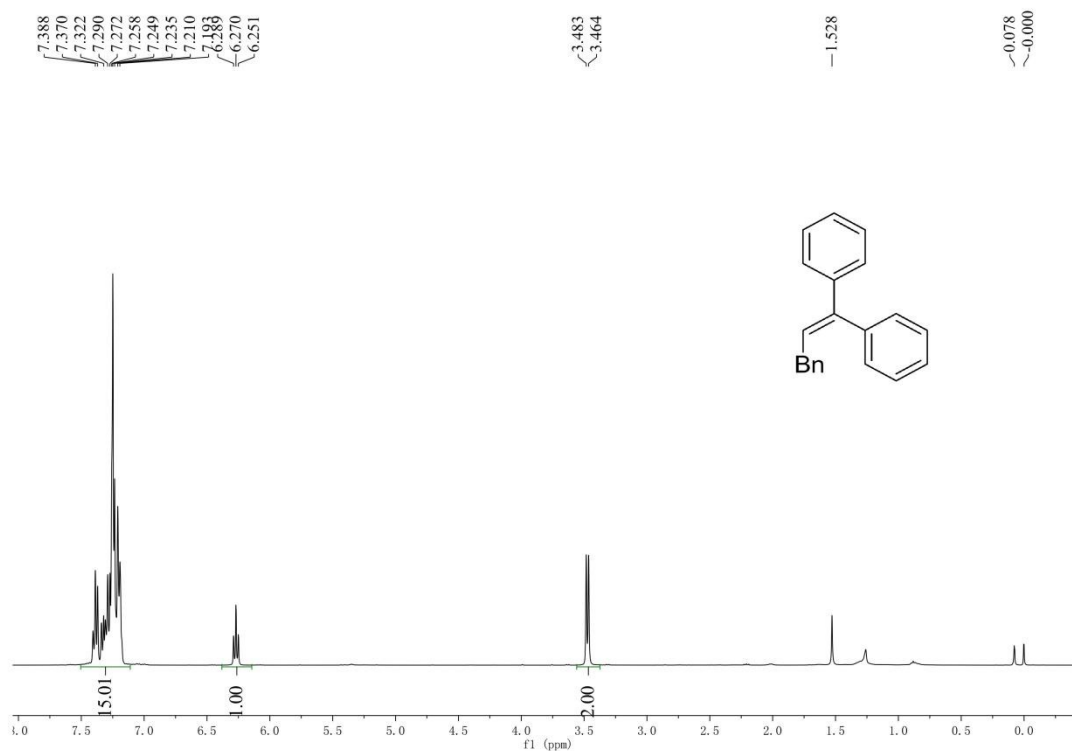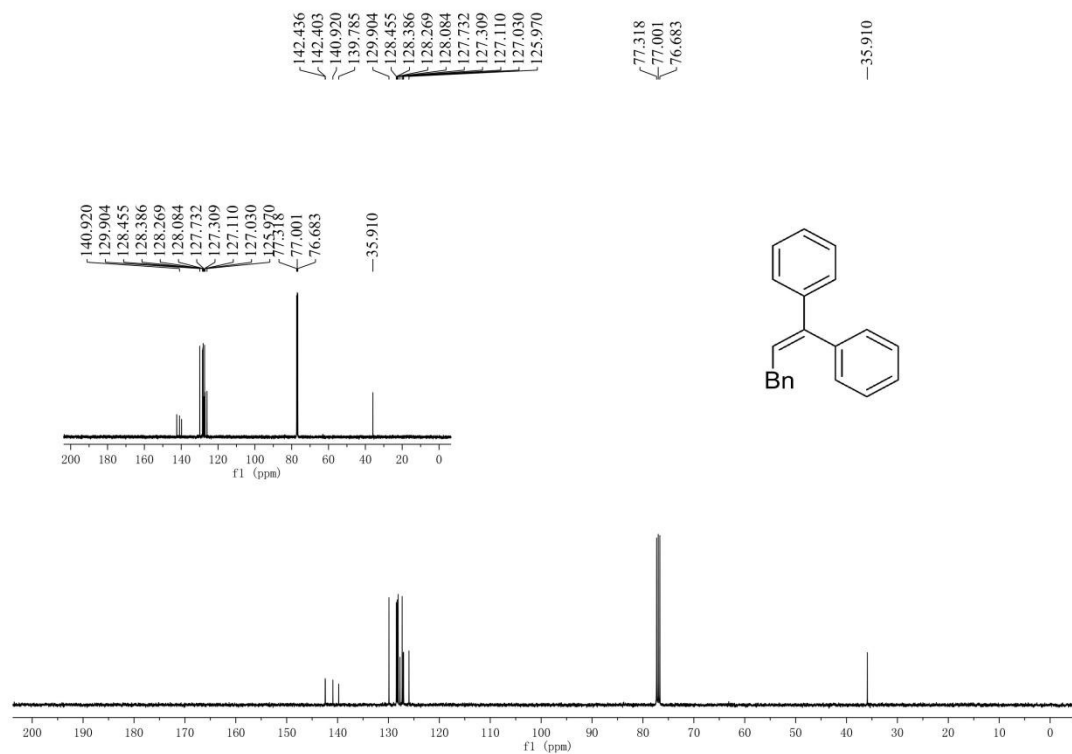

### Product 3ea and product 3ea-D<sub>4</sub>:

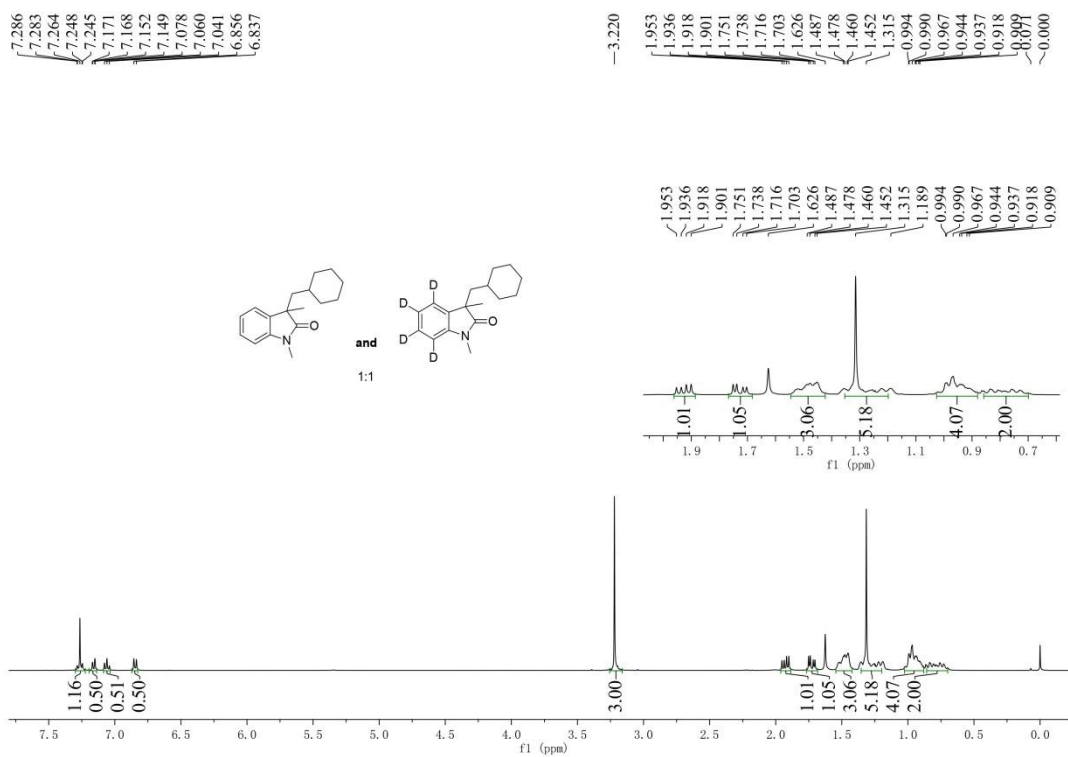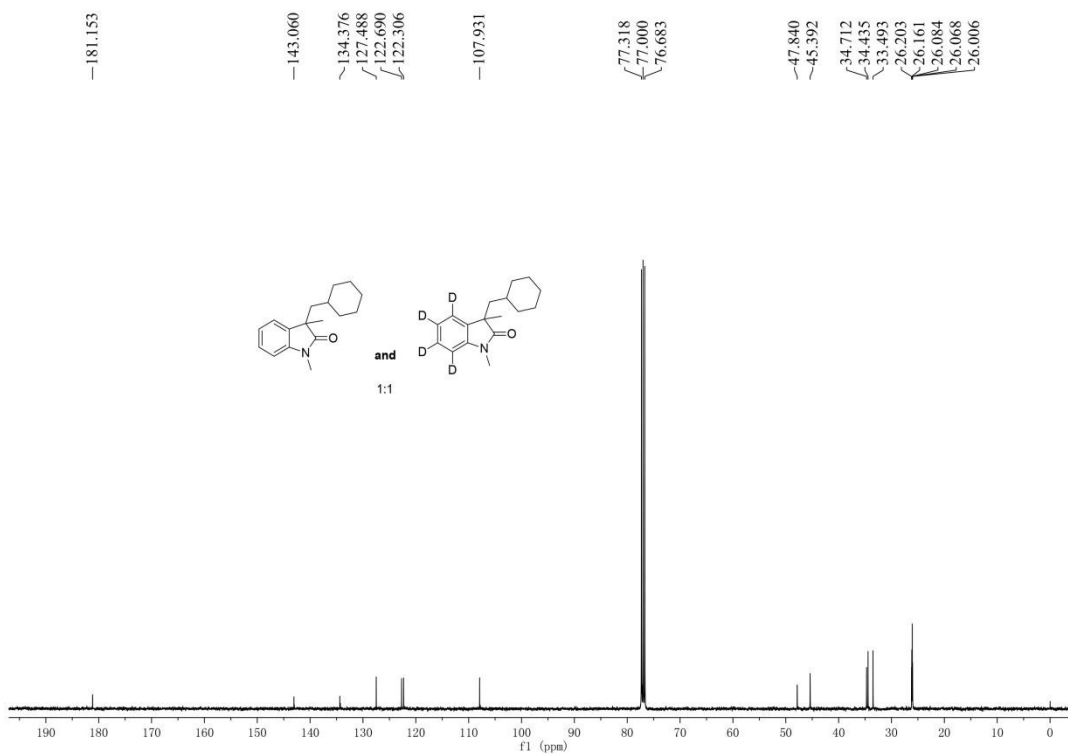

**Product 3ea and product 3ea-D<sub>1</sub>:**

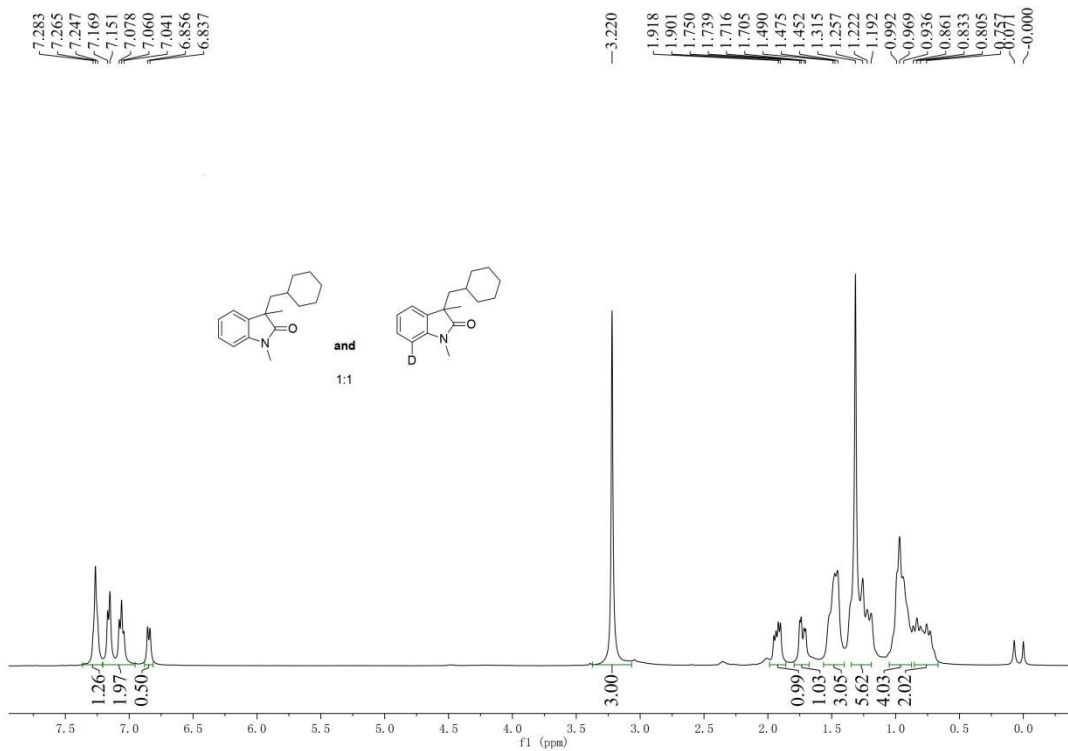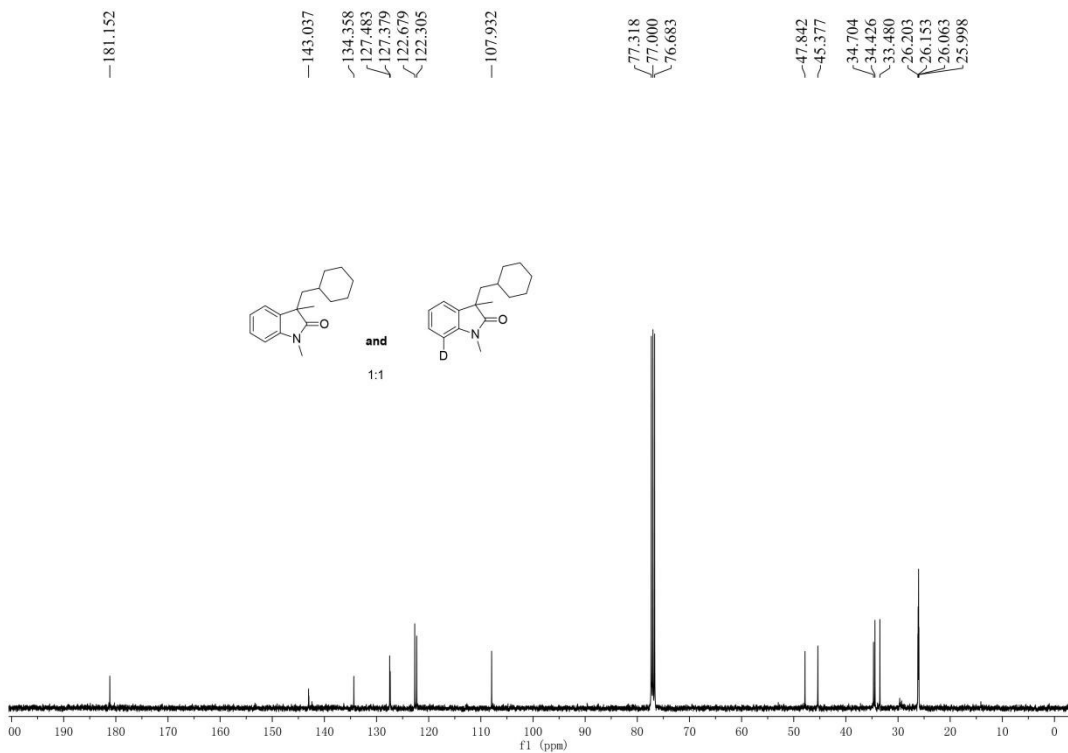

Supplement: d2ob00019a1.pdf [file d2ob00019a1.pdf]
